# Supplementary material for: Integrating short-read and long-read single-cell RNA sequencing for comprehensive transcriptome profiling in mouse retina
Source: HighWire-hosted journal article supplement (doi:10.1101/gr.279167.124), 2025-03-06
Supplement: Supplemental_Fig_S1.pdf [file Supplemental_Fig_S1.pdf]

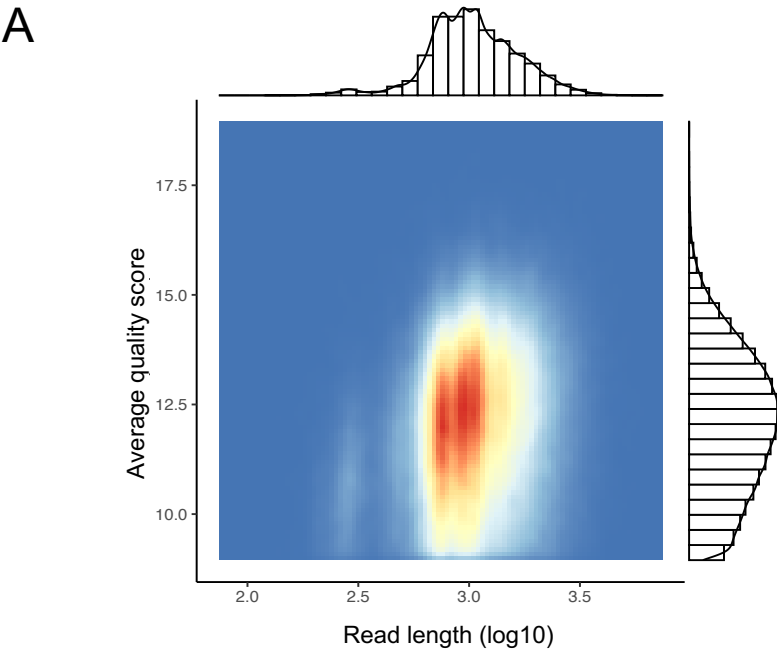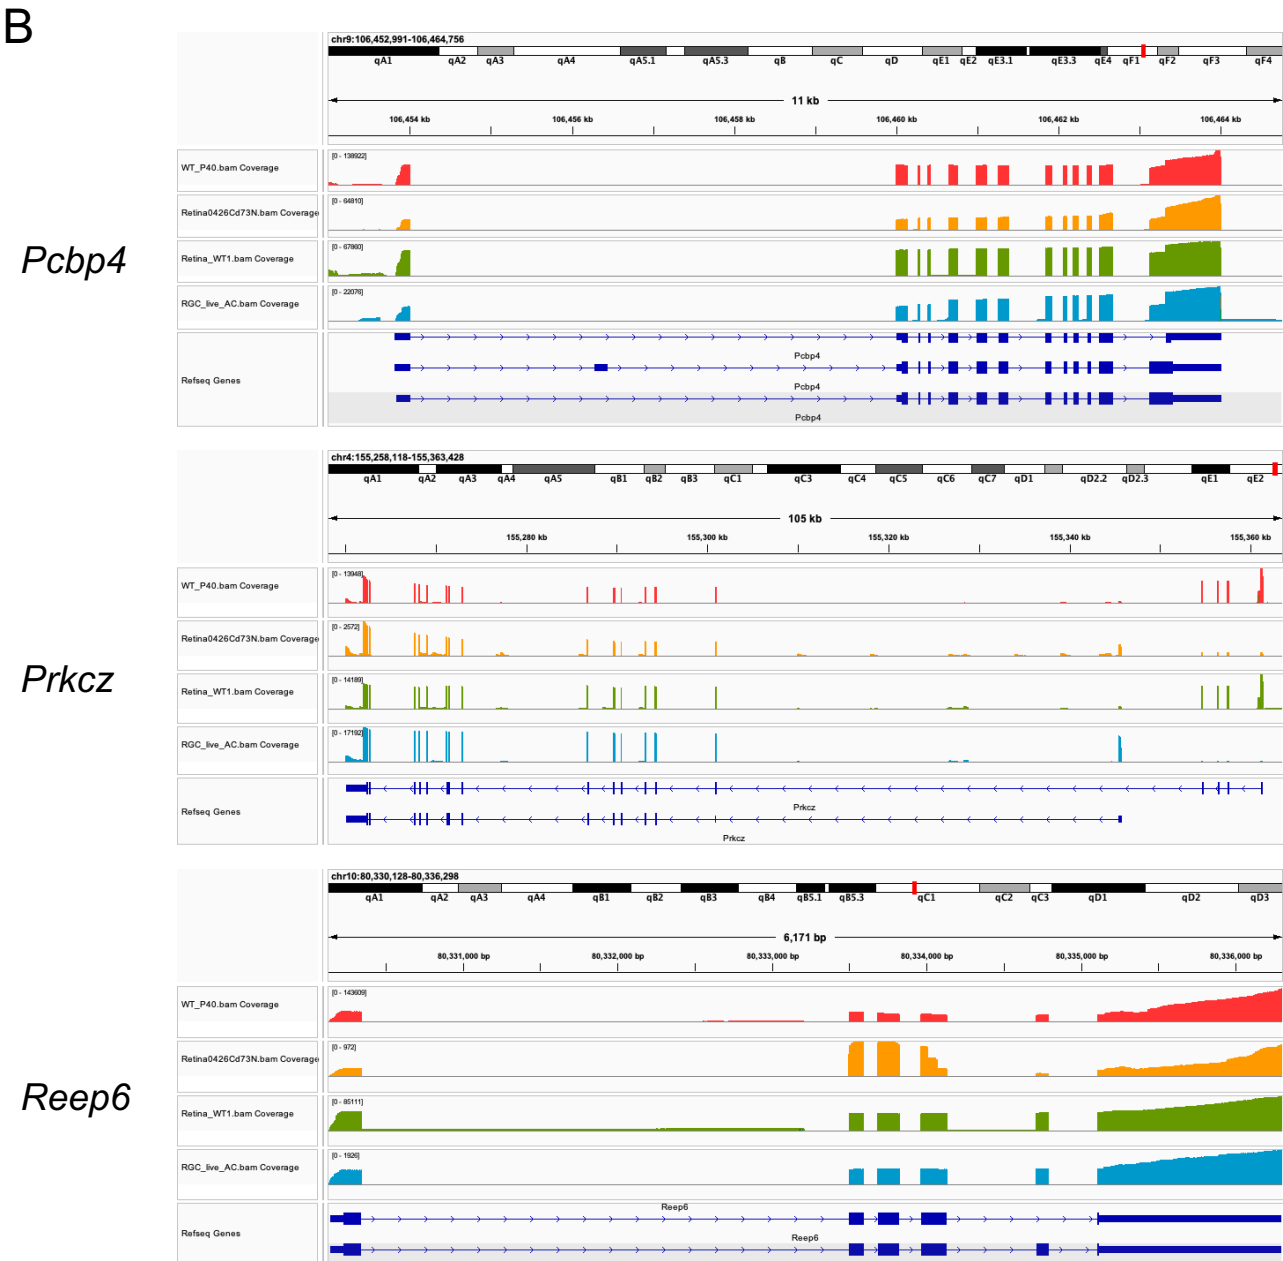

**Figure. S1 ONT long read quality**

A. Bivariate plot comparing log transformed read length with average basecall Phred quality score of all passed long reads.

B. Example visualizations from Integrative Genomics Viewer (IGV) to show the long read coverage along transcripts across the four samples
