# Supplementary material for: Integrating short-read and long-read single-cell RNA sequencing for comprehensive transcriptome profiling in mouse retina
Source: HighWire-hosted journal article supplement (doi:10.1101/gr.279167.124), 2025-03-06
Supplement: Supplemental_Fig_S2.pdf [file Supplemental_Fig_S2.pdf]

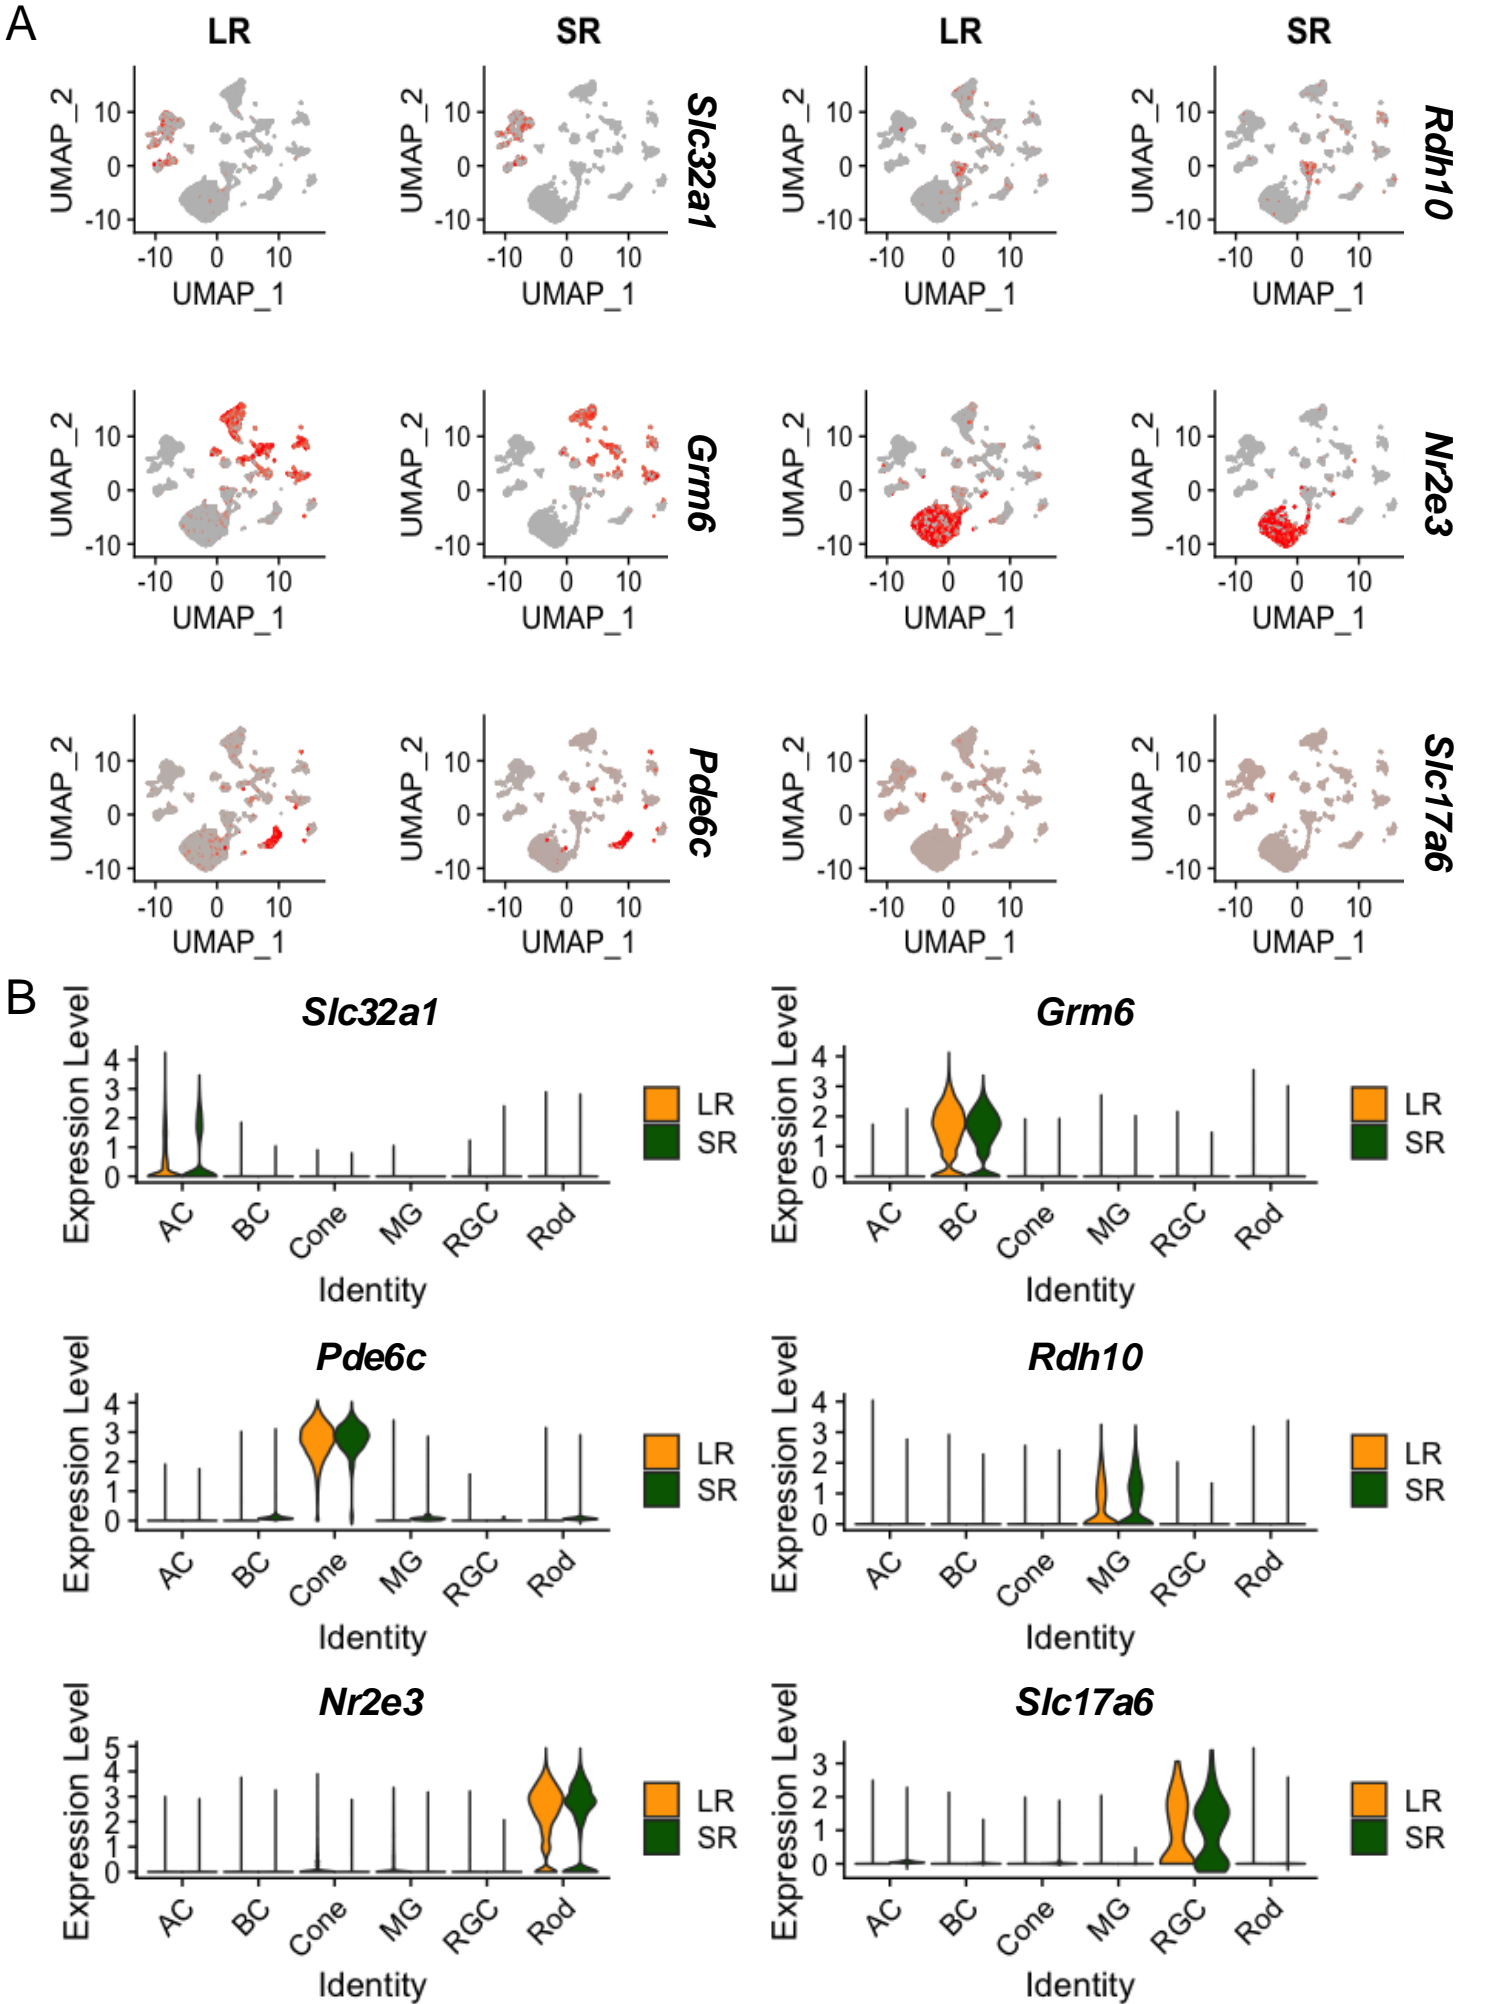

**Figure. S2 Comparison between LR and SR at gene level**

A. Feature plots of the known retinal marker genes for each major cell class between short and long-read data.

B. Violin plots of the known retinal marker genes for each major cell class between short and long-read data.
