# Supplementary material for: Integrating short-read and long-read single-cell RNA sequencing for comprehensive transcriptome profiling in mouse retina
Source: HighWire-hosted journal article supplement (doi:10.1101/gr.279167.124), 2025-03-06
Supplement: Supplemental_Fig_S3.pdf [file Supplemental_Fig_S3.pdf]

A

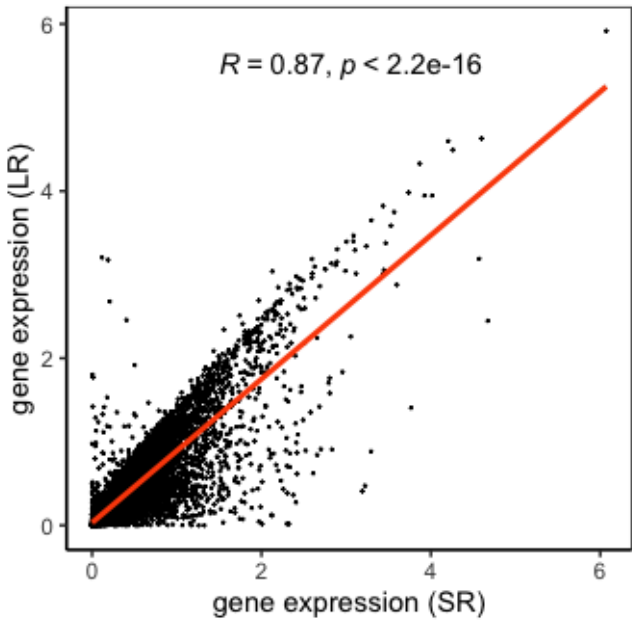

B

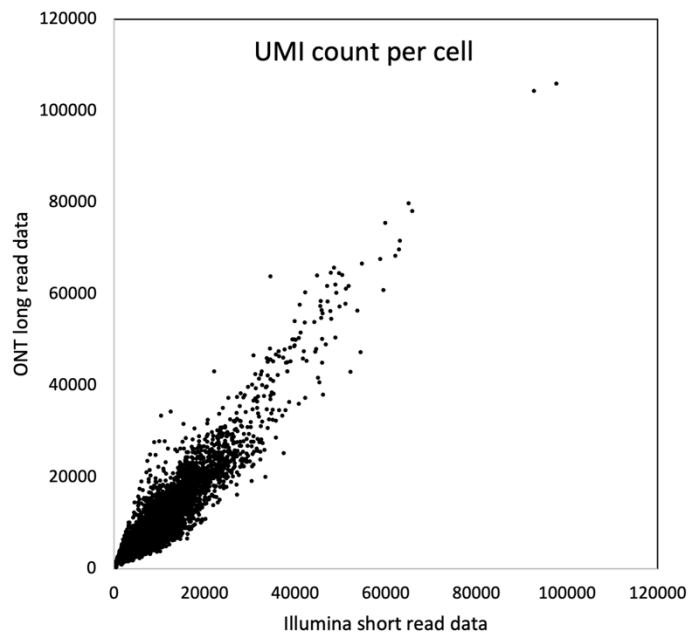

**Figure. S3 Comparison of long read and short read data**

A. Scatter plot for gene average expression of long read and short read data. Each dot represents a gene.

B. Scatter plot showing the comparison of long read and short read data on UMI count per cell. Each dot represents a cell.
