# Supplementary material for: Integrating short-read and long-read single-cell RNA sequencing for comprehensive transcriptome profiling in mouse retina
Source: HighWire-hosted journal article supplement (doi:10.1101/gr.279167.124), 2025-03-06
Supplement: Supplemental_Fig_S5.pdf [file Supplemental_Fig_S5.pdf]

A

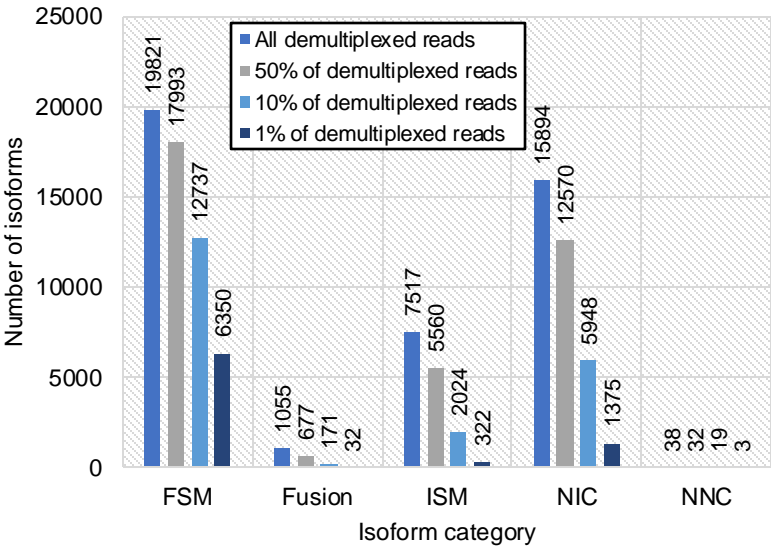

B

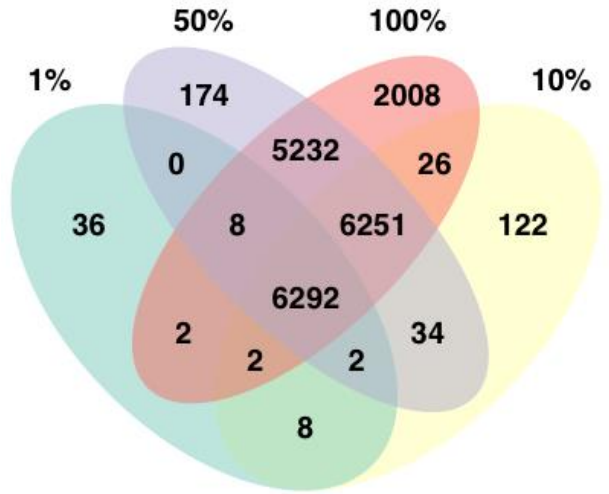

C Using 50% of demultiplexed LR

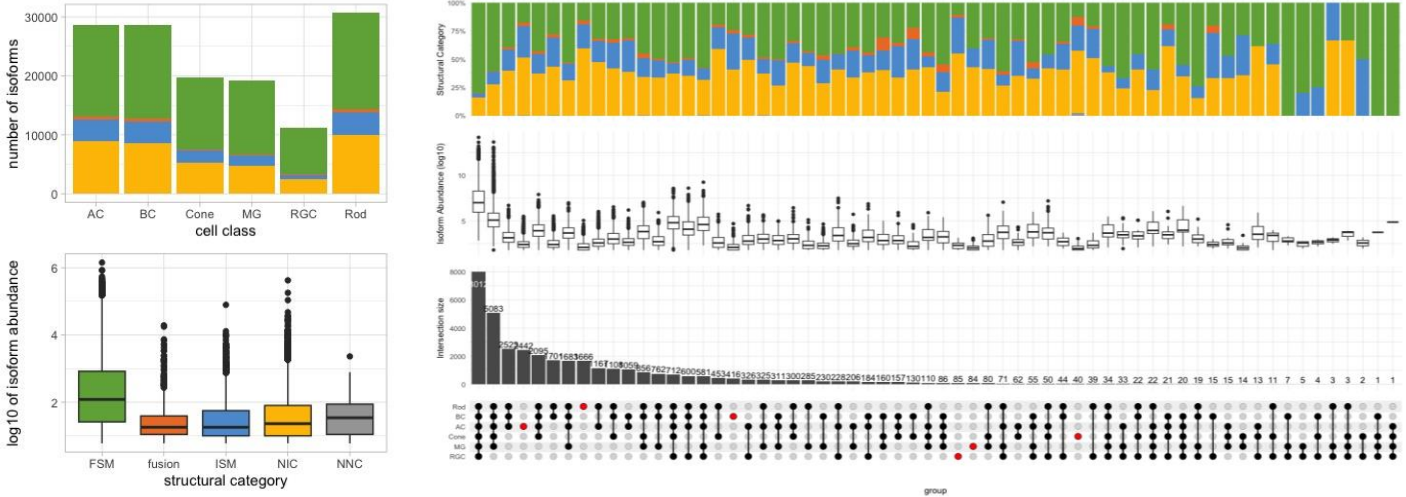

D Using 10% of demultiplexed LR

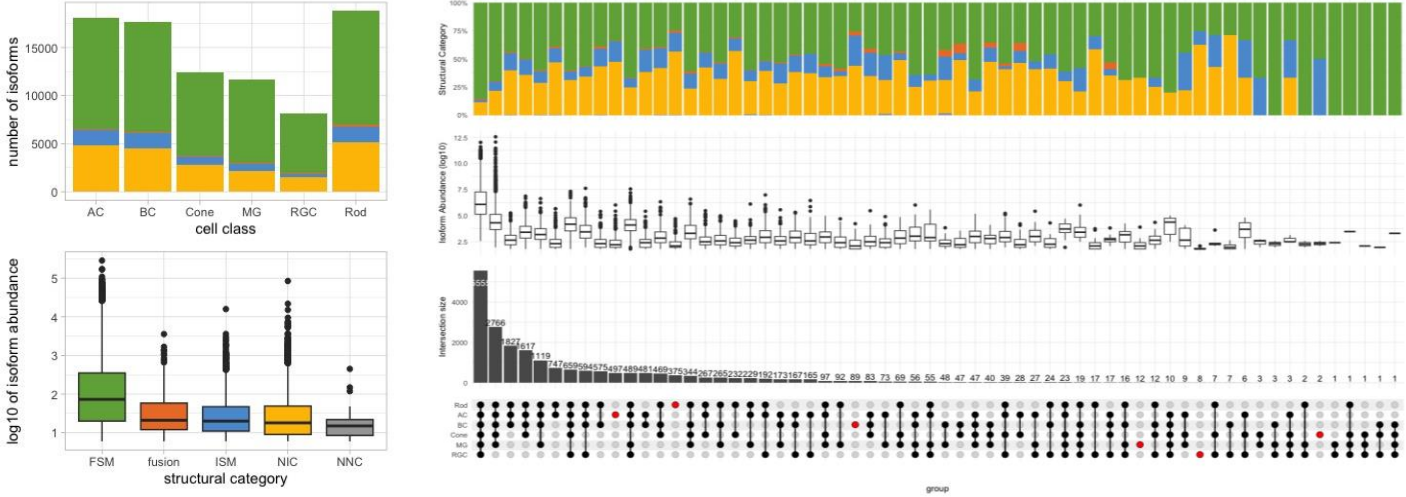

E Using 1% of demultiplexed LR

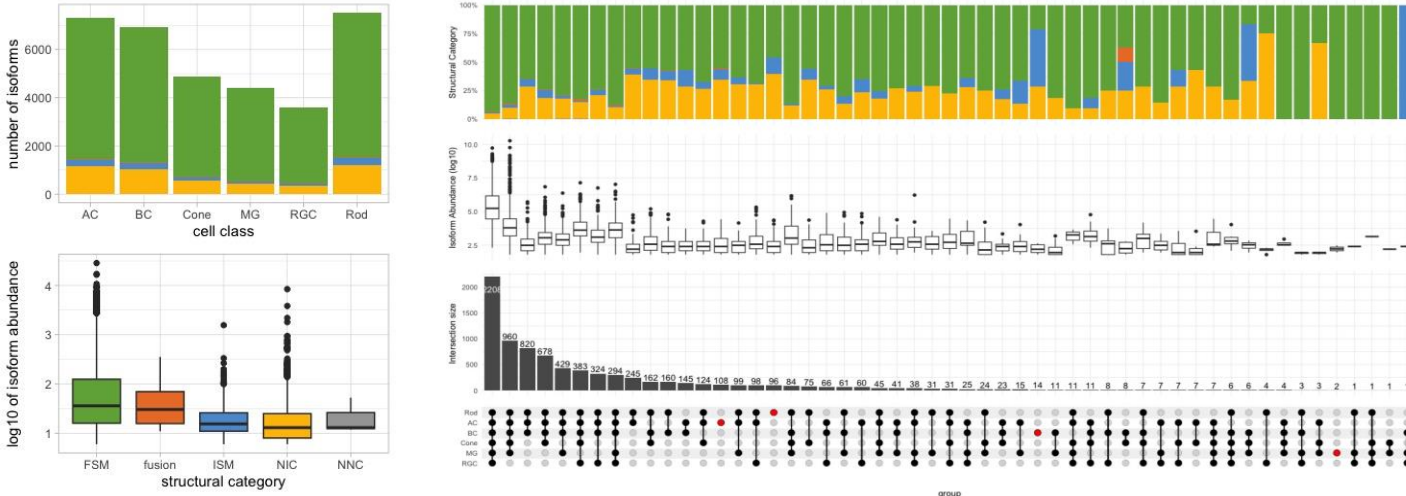

## **Figure. S5 Down sampling analysis**

A. Classification of isoforms according to their splice sites when compared to reference annotations and number of isoforms in each category detected by the 100%, 50%, 10% and 1% of demultiplexed LR<sub>s</sub>.

B. Venn diagram showing intersection of the FSM<sub>s</sub> detected using all, 50%, 10% and 1% of demultiplexed LR<sub>s</sub>. The counts were based on analysis result using software gffcompare.

C. Number of isoforms in different categories for each cell class, isoform abundance in different categories and overlap of isoforms in cell classes for the isoform set detected using 50% of demultiplexed LR<sub>s</sub>.

D. Number of isoforms in different categories for each cell class, isoform abundance in different categories and overlap of isoforms in cell classes for the isoform set detected using 10% of demultiplexed LR<sub>s</sub>.

E. Number of isoforms in different categories for each cell class, isoform abundance in different categories and overlap of isoforms in cell classes for the isoform set detected using 1% of demultiplexed LR<sub>s</sub>.
