# Supplementary material for: Integrating short-read and long-read single-cell RNA sequencing for comprehensive transcriptome profiling in mouse retina
Source: HighWire-hosted journal article supplement (doi:10.1101/gr.279167.124), 2025-03-06
Supplement: Supplemental_Fig_S6.pdf [file Supplemental_Fig_S6.pdf]

A

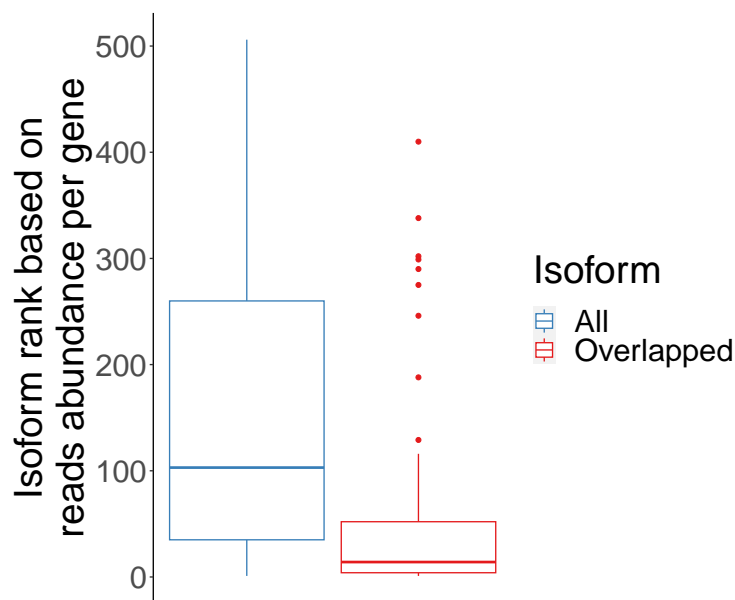

B

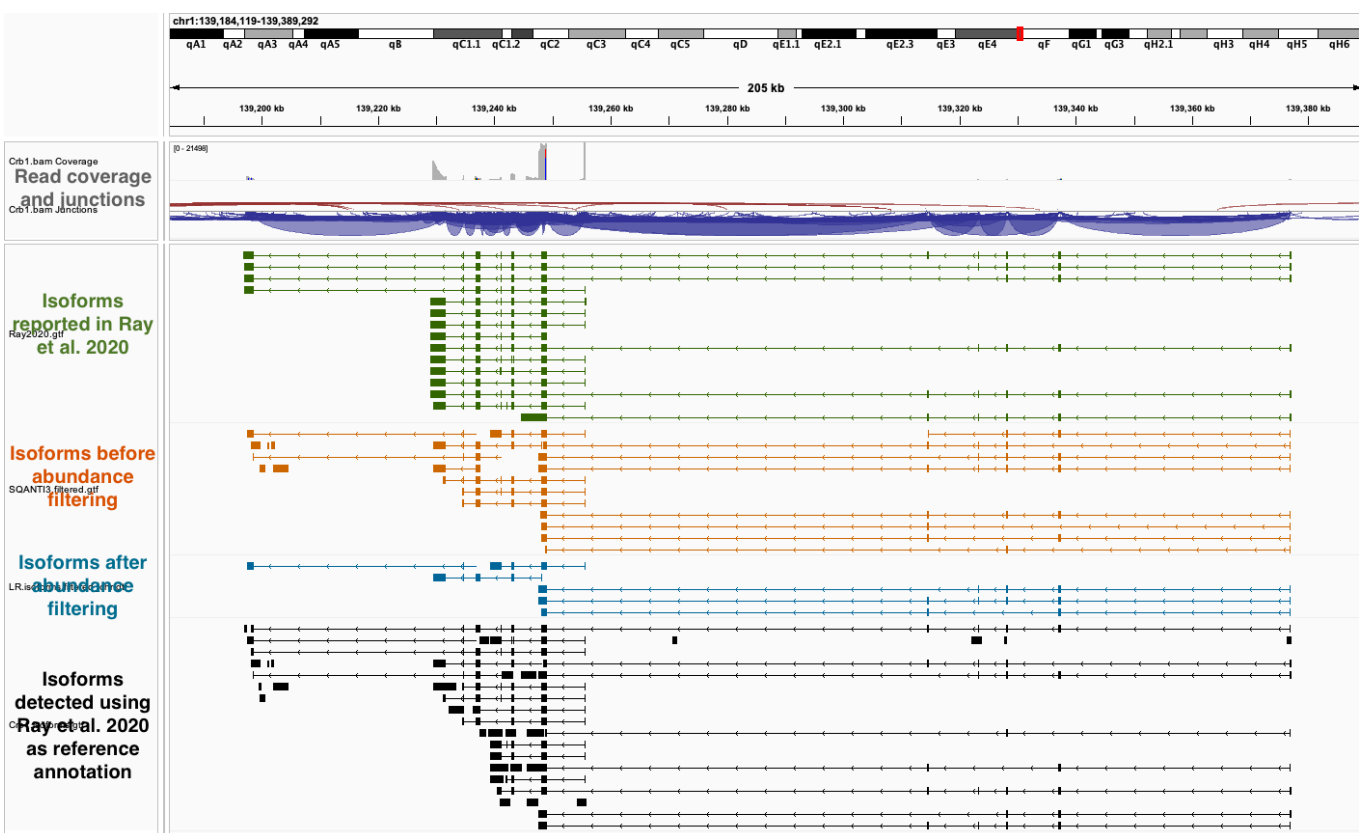

**Figure. S6 Comparison of isoforms detected from Ray et al. 2020**

A. The plot showing the isoform rank based on reads abundance per gene for the 24 genes associated with the 67 isoforms. A lower rank indicates that the isoform has higher reads abundance and potentially a higher expression level compared to other isoforms within its respective gene.

B. IGV visualization across gene Crb1 on (1) read coverage and junctions of demultiplexed long reads; (2) isoforms reported in Ray et al. 2020; (3) isoforms detected using LR scRNA-seq data before abundance filtering; (4) isoforms identified after abundance filtering; (5) isoform detected using GTF file provided by Ray et al. 2020 as reference annotation.
