# Supplementary material for: Integrating short-read and long-read single-cell RNA sequencing for comprehensive transcriptome profiling in mouse retina
Source: HighWire-hosted journal article supplement (doi:10.1101/gr.279167.124), 2025-03-06
Supplement: Supplemental_Fig_S7.pdf [file Supplemental_Fig_S7.pdf]

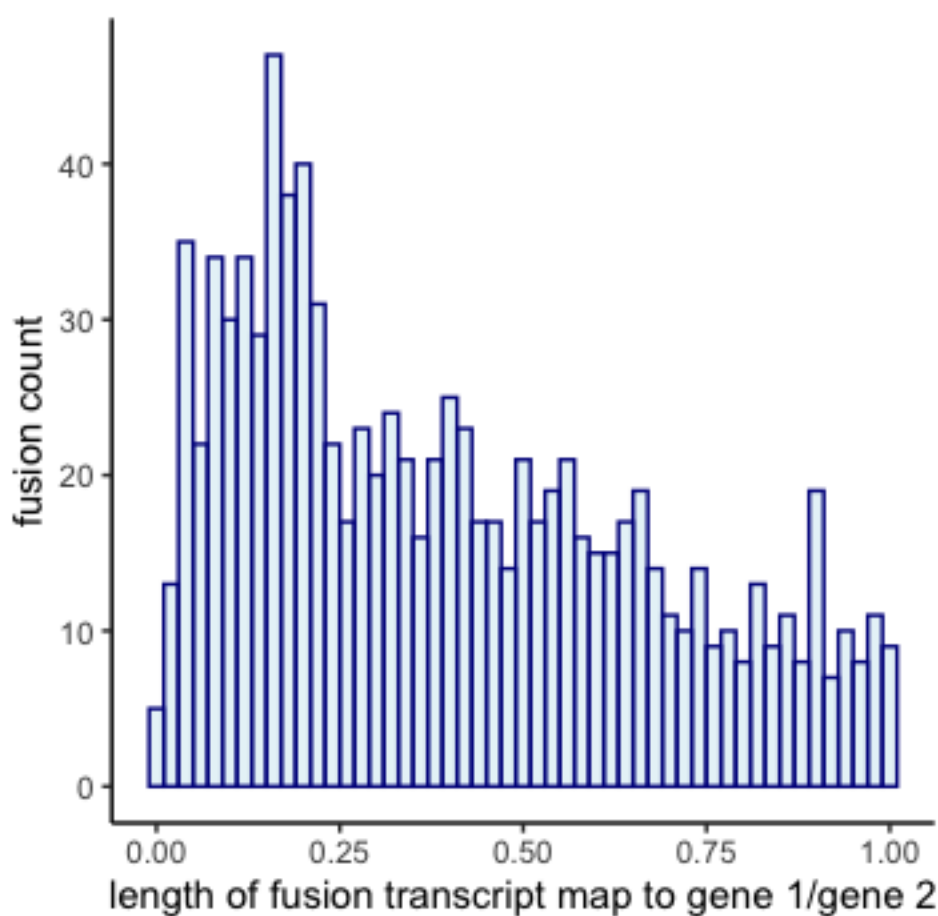

**Figure. S7** Distribution of fusion count on proportion (percentage of length) of the fusion transcript mapped to each of the fused genes. Only fusion transcripts with two fused genes were used for analysis.
