# Supplementary material for: Integrating short-read and long-read single-cell RNA sequencing for comprehensive transcriptome profiling in mouse retina
Source: HighWire-hosted journal article supplement (doi:10.1101/gr.279167.124), 2025-03-06
Supplement: Supplemental_Table_S3.pdf [file Supplemental_Table_S3.pdf]

**Supplemental Table 3.** Summary of number and percentage of long reads passed filtering and demultiplexing for each sample.

| Sample ID       | Long reads<br>per flow cell | Total ONT<br>long reads | Well-<br>structured<br>long reads | Demultiplexed<br>long reads | UMI found   |
|-----------------|-----------------------------|-------------------------|-----------------------------------|-----------------------------|-------------|
| WT_P40          | 123,629,895                 | 397,145,158             | 371,791,116<br>(93.62%)           | 166,451,405<br>(41.91%)     | 116,390,196 |
|                 | 105,667,835                 |                         |                                   |                             |             |
|                 | 117,732,454                 |                         |                                   |                             |             |
|                 | 50,114,974                  |                         |                                   |                             |             |
| Retina0426Cd73N | 101,344,201                 | 405,815,715             | 373,734,904<br>(92.09%)           | 108,966,596<br>(26.85%)     | 73,650,477  |
|                 | 117,506,930                 |                         |                                   |                             |             |
|                 | 85,719,533                  |                         |                                   |                             |             |
|                 | 101,245,051                 |                         |                                   |                             |             |
| Retina_WT1      | 72,680,045                  | 287,446,733             | 263,923,680<br>(91.82%)           | 102,148,840<br>(35.54%)     | 80,240,552  |
|                 | 59,516,227                  |                         |                                   |                             |             |
|                 | 77,548,160                  |                         |                                   |                             |             |
|                 | 77,702,301                  |                         |                                   |                             |             |
| RGC_live_AC     | 76,566,110                  | 310,531,327             | 279,196,517<br>(89.91%)           | 140,097,833<br>(45.12%)     | 122,961,379 |
|                 | 85,885,591                  |                         |                                   |                             |             |
|                 | 88,947,359                  |                         |                                   |                             |             |
|                 | 59,132,267                  |                         |                                   |                             |             |
| Total           | 1,400,938,933               | 1,400,938,933           | 1,288,646,217<br>(91.98%)         | 517,664,674<br>(36.95%)     | 393,242,604 |
