# Supplementary material for: Integrating short-read and long-read single-cell RNA sequencing for comprehensive transcriptome profiling in mouse retina
Source: HighWire-hosted journal article supplement (doi:10.1101/gr.279167.124), 2025-03-06
Supplement: Supplemental_Table_S6.xlsx [file Supplemental_Table_S6.xlsx]

## Sheet: fusion_TAD
Supplemental Table S6 Detected gene fusions mapped to TAD regions in adult mouse retina (GSE135465)
fusion_chr	fusion_start	fusion_end	TAD_chr	TAD_start	TAD_end	fusion_within_TAD	fusion_ID
chr1	16081823	16103654	chr1	15700000	16699999	Y	gene_id "ENSMUSG00000043716.13"; transcript_id "a4f2d88b-b354-49b5-beef-5ebefdc6bada_FWD_pA_Ad3p";
chr1	16344291	16619259	chr1	15700000	16699999	Y	gene_id "ENSMUSG00000025920.19"; transcript_id "511e06d6-7a53-45b8-9cec-27820dd7b0cc_FWD_pA_Ad3p";
chr1	16569782	16657038	chr1	15700000	16699999	Y	gene_id "ENSMUSG00000025939.19"; transcript_id "a127a716-e008-48f0-813c-56f4db0cd26d_REV_pT_Ad5p_TSO3p";
chr1	17145362	17172783	chr1	17100000	17299999	Y	gene_id "ENSMUSG00000025777.8"; transcript_id "04a1d80e-4774-44e3-9865-0185e94a0624_FWD_pA_Ad3p";
chr1	17145362	17173103	chr1	17100000	17299999	Y	gene_id "ENSMUSG00000025777.8"; transcript_id "fd917563-2dcd-4578-b042-79881858109f_FWD_pA_Ad3p";
chr1	21218575	21265208	chr1	20700000	21399999	Y	gene_id "ENSMUSG00000025934.15"; transcript_id "2fe07043-2c54-462c-864a-b4294af5afdf_FWD_pA_Ad3p";
chr1	21218575	21265208	chr1	20700000	21399999	Y	gene_id "ENSMUSG00000025934.15"; transcript_id "a4d9097a-5bd7-47bf-a801-a2adde52ca6c_FWD_pA-1_Ad3p";
chr1	21218804	21265661	chr1	20700000	21399999	Y	gene_id "ENSMUSG00000025934.15"; transcript_id "2fe07043-2c54-462c-864a-b4294af5afdf_FWD_pA-1_Ad3p";
chr1	36530188	36547231	chr1	36100000	38199999	Y	gene_id "ENSMUSG00000067653.12"; transcript_id "88c71e4d-ff05-46d5-a76d-1be58a9635b7_FWD_pA_Ad3p";
chr1	36530193	36547231	chr1	36100000	38199999	Y	gene_id "ENSMUSG00000067653.12"; transcript_id "0741b2d7-7e50-41b2-a837-6029ea21f16f_REV_pT_Ad5p_TSO3p";
chr1	36530193	36547231	chr1	36100000	38199999	Y	gene_id "ENSMUSG00000067653.12"; transcript_id "4ed4c4e3-ddf3-4b31-8331-e418336e7f10_FWD_pA_Ad3p";
chr1	36530193	36547231	chr1	36100000	38199999	Y	gene_id "ENSMUSG00000067653.12"; transcript_id "50fb54b4-cc97-46cc-b92b-ca0e6e5b3f1b_FWD_pA_Ad3p";
chr1	36530193	36547231	chr1	36100000	38199999	Y	gene_id "ENSMUSG00000067653.12"; transcript_id "7a6b4d9e-c28b-4ce0-ab2a-a278f1904e71_REV_pT_Ad5p_TSO3p";
chr1	36530193	36547231	chr1	36100000	38199999	Y	gene_id "ENSMUSG00000067653.12"; transcript_id "7dd1d604-e7ec-4877-8444-b1ed3cb029e8_FWD_pA_Ad3p";
chr1	36530193	36547231	chr1	36100000	38199999	Y	gene_id "ENSMUSG00000067653.12"; transcript_id "83b9b464-dc0d-41db-949e-2347e7e40c78_REV_pT_Ad5p_TSO3p";
chr1	36530193	36547231	chr1	36100000	38199999	Y	gene_id "ENSMUSG00000067653.12"; transcript_id "ebf044b2-a8e7-4846-bd73-12f3d0578f29_FWD_pA_Ad3p";
chr1	36531467	36547231	chr1	36100000	38199999	Y	gene_id "ENSMUSG00000067653.12"; transcript_id "b76a4832-4a40-45e7-82fc-7444bee92060_FWD_pA_Ad3p";
chr1	44074059	44102414	chr1	43800000	44199999	Y	gene_id "ENSMUSG00000026049.11"; transcript_id "9280b8c4-dee4-46d3-9243-72fcb49efecc_FWD_pA_Ad3p";
chr1	44075268	44102414	chr1	43800000	44199999	Y	gene_id "ENSMUSG00000026049.11"; transcript_id "584f36d6-7307-4ae9-8ee4-3a5f3f392aff_REV_pT_Ad5p";
chr1	52789084	52952844	chr1	52100000	53399999	Y	gene_id "ENSMUSG00000026102.9"; transcript_id "8941353a-3339-4d7c-b8a5-81bab65e69b2_FWD_pA_Ad3p";
chr1	53297095	53326175	chr1	52100000	53399999	Y	gene_id "ENSMUSG00000026096.14"; transcript_id "3e170d55-8dbf-42b9-ab24-fc991f864b6b_REV_pT_Ad5p_TSO3p";
chr1	53297095	53326175	chr1	52100000	53399999	Y	gene_id "ENSMUSG00000026096.14"; transcript_id "5d921ca9-b469-46a7-8dd3-43b3f8b5fb7e_REV_pT_Ad5p_TSO3p";
chr1	53297111	53326343	chr1	52100000	53399999	Y	gene_id "ENSMUSG00000026096.14"; transcript_id "1a7ff672-83ff-4711-a7ab-e80edc99842c_REV_pT_Ad5p-1_TSO3p";
chr1	53297111	53326175	chr1	52100000	53399999	Y	gene_id "ENSMUSG00000026096.14"; transcript_id "330f501d-1ba2-4d27-b03c-903dfa9be5d4_REV_pT_Ad5p_TSO3p";
chr1	53297111	53326175	chr1	52100000	53399999	Y	gene_id "ENSMUSG00000026097.9"; transcript_id "48d2135c-4e41-47e1-97bc-764476daa61b_FWD_pA_Ad3p";
chr1	53297111	53326175	chr1	52100000	53399999	Y	gene_id "ENSMUSG00000026096.14"; transcript_id "e180c841-c359-43aa-b5de-59c94bcfd6b3_FWD_pA_Ad3p";
chr1	53297111	53326175	chr1	52100000	53399999	Y	gene_id "ENSMUSG00000100679.1"; transcript_id "f4cfd2f4-8153-40d2-9dd7-885b42f274cd_REV_pT_Ad5p_TSO3p";
chr1	53297111	53326175	chr1	52100000	53399999	Y	gene_id "ENSMUSG00000026096.14"; transcript_id "f78b2391-8a8b-4592-b059-6155d7eb1206_REV_pT_Ad5p_TSO3p";
chr1	53325673	53348149	chr1	52100000	53399999	Y	gene_id "ENSMUSG00000099913.1"; transcript_id "34a5e0e7-085d-49c9-907b-d74e2b464d3a_REV_pT_Ad5p_TSO3p";
chr1	57377640	57415907	chr1	58400000	60599999	Y	gene_id "ENSMUSG00000025971.6"; transcript_id "848c841e-ba54-46b7-b38e-6d97efc2e841_FWD_pA_Ad3p";
chr1	59018252	59119806	chr1	58400000	60599999	Y	gene_id "ENSMUSG00000038079.14"; transcript_id "392ef6f2-b2b2-44eb-85a7-d926a04bb1b3_REV_pT_Ad5p_TSO3p";
chr1	59050506	59119806	chr1	58400000	60599999	Y	gene_id "ENSMUSG00000038079.14"; transcript_id "b85ad12f-a31f-4f27-a3fb-68b349a251b0_FWD_pA-1_Ad3p";
chr1	59064478	59119806	chr1	58400000	60599999	Y	gene_id "ENSMUSG00000038079.14"; transcript_id "7cf19afa-9711-42d8-ae00-38dbf61433ef_FWD_pA_Ad3p";
chr1	59076132	59119806	chr1	58400000	60599999	Y	gene_id "ENSMUSG00000038079.14"; transcript_id "9a05f421-d5e1-4f38-9911-4e10dc5181a3_REV_pT_Ad5p_TSO3p";
chr1	59100911	59161636	chr1	58400000	60599999	Y	gene_id "ENSMUSG00000038079.14"; transcript_id "92fa178a-903f-4a74-9ea4-c95790862d7d_REV_pT_Ad5p_TSO3p";
chr1	59100911	59161636	chr1	74200000	75599999	Y	gene_id "ENSMUSG00000038079.14"; transcript_id "cc69256a-984e-4c40-b609-1b49499ec5dc_FWD_pA_Ad3p_TSO5p";
chr1	75236487	75257840	chr1	78500000	78699999	N	gene_id "ENSMUSG00000026203.16"; transcript_id "52983063-088c-430d-b8bd-7b54c7c7e465_REV_pT_Ad5p_TSO3p";
chr1	78425085	78512158	chr1	105700000	107499999	Y	gene_id "ENSMUSG00000026245.16"; transcript_id "60a2ef9e-3a14-475d-9c66-43ef5b50b182_FWD_pA_Ad3p";
chr1	106030573	106287422	chr1	109400000	119499999	N	gene_id "ENSMUSG00000044340.7"; transcript_id "95ff3e19-7d2c-4495-bfdb-7570c9d86a2c_REV_pT_Ad5p_TSO3p";
chr1	119471121	119526359	chr1	120000000	120199999	N	gene_id "ENSMUSG00000004451.14"; transcript_id "4bda696a-3ed3-40ba-9826-359c66588cbb_REV_pT_Ad5p_TSO3p";
chr1	120113290	120244269	chr1	120000000	120199999	N	gene_id "ENSMUSG00000026389.16"; transcript_id "3a8c9857-8243-404b-bedf-705828995672_REV_pT_Ad5p";
chr1	120113290	120265284	chr1	120200000	120499999	N	gene_id "ENSMUSG00000026389.16"; transcript_id "4ce4172f-1256-49c8-b9a2-ea66d3381f40_FWD_pA_Ad3p";
chr1	130717529	130744622	chr1	130400000	130799999	Y	gene_id "ENSMUSG00000042510.7"; transcript_id "95fe23f7-e03e-4f5b-853b-3031069e42eb_FWD_pA_Ad3p";
chr1	132008109	132024577	chr1	132000000	132199999	Y	gene_id "ENSMUSG00000026436.15"; transcript_id "1fef03fe-a60f-43df-b683-19b924ac2099_FWD_pA_Ad3p";
chr1	132008109	132023898	chr1	132000000	132199999	Y	gene_id "ENSMUSG00000026436.15"; transcript_id "bff047ae-059e-4dad-9aee-972cd6968b4f_REV_pT_Ad5p_TSO3p";
chr1	155778158	155860561	chr1	152300000	196999999	Y	gene_id "ENSMUSG00000033684.14"; transcript_id "e2b0ea14-c2f5-423b-8111-b70e9f5ee19c_FWD_pA_Ad3p";
chr1	171129164	171196268	chr1	152300000	196999999	Y	gene_id "ENSMUSG00000058076.12"; transcript_id "fdc954ce-529c-4285-b26e-8083636f36af_FWD_pA_Ad3p";
chr1	172482199	172507380	chr1	152300000	196999999	Y	gene_id "ENSMUSG00000026547.15"; transcript_id "b702f626-f80e-476f-804c-72fed79d2399_FWD_pA_Ad3p";
chr1	172482220	172507380	chr1	152300000	196999999	Y	gene_id "ENSMUSG00000026547.15"; transcript_id "4f787a76-5d71-4e61-912b-e5cfc5a48dd6_REV_pT_Ad5p_TSO3p";
chr1	172482220	172507380	chr1	152300000	196999999	Y	gene_id "ENSMUSG00000026547.15"; transcript_id "d4508150-ad9f-4a4b-a60b-93d10dbb5ae8_REV_pT_Ad5p_TSO3p";
chr1	186625083	186749325	chr1	152300000	196999999	Y	gene_id "ENSMUSG00000039239.14"; transcript_id "819bd6c6-5680-414c-98b5-90b4434d7327_REV_pT_Ad5p_TSO3p";
chr1	195041900	195131355	chr1	152300000	196999999	Y	gene_id "ENSMUSG00000016493.13"; transcript_id "58d78287-89ec-4bf1-ac8f-973cfed97fec_FWD_pA_Ad3p";
chr1	195041900	195131534	chr1	152300000	196999999	Y	gene_id "ENSMUSG00000016493.13"; transcript_id "70d2ff63-05fb-44bb-9dcc-48b659459bea_REV_pT_Ad5p_TSO3p";
chr1	195063569	195131534	chr1	152300000	196999999	Y	gene_id "ENSMUSG00000016481.15"; transcript_id "2294885c-df7b-4115-8e2c-2aec32590293_REV_pT_Ad5p_TSO3p";
chr1	195085155	195131355	chr1	152300000	196999999	Y	gene_id "ENSMUSG00000016481.15"; transcript_id "2c32be93-a7f3-4340-901c-3b421e99da7b_REV_pT_Ad5p";
chr1	195085155	195131534	chr1	152300000	196999999	Y	gene_id "ENSMUSG00000016481.15"; transcript_id "4be173bc-2cfa-4eee-8a91-81a642636c49_FWD_pA_Ad3p";
chr1	195085155	195131534	chr1	152300000	196999999	Y	gene_id "ENSMUSG00000016481.15"; transcript_id "a907c1b6-dc78-442a-9824-a44b8939b00b_REV_pT_Ad5p_TSO3p";
chr10	18743777	18857073	chr10	18200000	20099999	Y	gene_id "ENSMUSG00000019851.8"; transcript_id "4b980932-79bc-4ad0-8659-68a3242fb719_REV_pT_Ad5p_TSO3p";
chr10	18743777	18857073	chr10	18200000	20099999	Y	gene_id "ENSMUSG00000111474.1"; transcript_id "deec94ae-82e5-4e37-b459-cb9d8b06741e_FWD_pA_Ad3p";
chr10	26695338	26850001	chr10	26800000	26999999	N	gene_id "ENSMUSG00000039031.16"; transcript_id "3692a784-95df-4a91-94a6-d1585576d148_FWD_pA_Ad3p";
chr10	29147335	29199189	chr10	29100000	29299999	Y	gene_id "10:29147000"; transcript_id "00a2565d-6a2a-4e48-bf1d-f314951cc2cc_FWD_pA_Ad3p";
chr10	29147797	29199189	chr10	29100000	29299999	Y	gene_id "ENSMUSG00000038916.7"; transcript_id "9728fc4f-4301-47e3-b8e5-688e8d607b68_REV_pT_Ad5p_TSO3p";
chr10	57784881	57811830	chr10	57700000	57999999	Y	gene_id "ENSMUSG00000019872.13"; transcript_id "713adaea-fb42-4167-8a9e-a958571322d7_FWD_pA_Ad3p";
chr10	75748922	75773414	chr10	74400000	77899999	Y	gene_id "ENSMUSG00000020196.10"; transcript_id "b61fbca0-82dd-4bf0-8ddd-303e7d77994e_REV_pT_Ad5p_TSO3p";
chr10	75774115	75798584	chr10	74400000	77899999	Y	gene_id "ENSMUSG00000001665.11"; transcript_id "4dd3a6b8-b827-4c3b-8794-496cf9907563_FWD_pA_Ad3p";
chr10	75783984	75822423	chr10	74400000	77899999	Y	gene_id "ENSMUSG00000001663.10"; transcript_id "32894d73-6ba0-4491-a72c-9034088508dc_REV_pT_Ad5p_TSO3p";
chr10	75783984	75822423	chr10	74400000	77899999	Y	gene_id "ENSMUSG00000001663.10"; transcript_id "3f17366d-c7a7-4fd6-b140-7c49e75a011e_REV_pT_Ad5p_TSO3p";
chr10	75783984	75822423	chr10	74400000	77899999	Y	gene_id "ENSMUSG00000001663.10"; transcript_id "be7cabf3-afc9-451a-aaae-594cc8fa6818_REV_pT_Ad5p_TSO3p";
chr10	75814943	75834479	chr10	74400000	77899999	Y	gene_id "ENSMUSG00000009093.7"; transcript_id "a64815ea-3367-488f-bc3c-cf0db9783fb7_REV_pT_Ad5p_TSO3p";
chr10	75814944	75834479	chr10	74400000	77899999	Y	gene_id "ENSMUSG00000009093.7"; transcript_id "d2c10887-4c36-4266-ad73-d154be9a509b_FWD_pA_Ad3p";
chr10	76890572	77008416	chr10	74400000	77899999	Y	gene_id "ENSMUSG00000112143.1"; transcript_id "1adfe934-fc17-45dd-9b34-37636825f87c_FWD_pA_Ad3p";
chr10	78273365	78307550	chr10	78100000	78299999	N	gene_id "ENSMUSG00000001211.15"; transcript_id "1d8477ad-5db1-4d0c-9861-8c503a2dd48d_FWD_pA_Ad3p";
chr10	78273365	78307550	chr10	78100000	78299999	N	gene_id "10:78273000"; transcript_id "268b6a7f-6860-423f-8d8b-285acf4220e7_REV_pT_Ad5p_TSO3p";
chr10	80165985	80175146	chr10	79000000	81099999	Y	gene_id "ENSMUSG00000045193.13"; transcript_id "6668aee2-c00f-4911-b7e1-9dec1f185aa2_FWD_pA_Ad3p_TSO5p";
chr10	80167840	80175146	chr10	79000000	81099999	Y	gene_id "ENSMUSG00000045193.13"; transcript_id "1def10bf-841a-4e78-be7a-fe681e69b37b_REV_pT_Ad5p_TSO3p";
chr10	80167840	80175146	chr10	79000000	81099999	Y	gene_id "ENSMUSG00000045193.13"; transcript_id "6329f6cd-d3fe-46ee-84ab-73d0b5954675_REV_pT_Ad5p_TSO3p";
chr10	80167840	80175146	chr10	79000000	81099999	Y	gene_id "ENSMUSG00000045193.13"; transcript_id "815b4fd1-7727-453f-a831-7db93d6b7c15_REV_pT_Ad5p_TSO3p";
chr10	80172944	80189650	chr10	79000000	81099999	Y	gene_id "ENSMUSG00000003070.6"; transcript_id "1da80b09-00c7-46b6-bff9-973bc158d66e_FWD_pA_Ad3p_TSO5p";
chr10	80238915	80256793	chr10	79000000	81099999	Y	gene_id "ENSMUSG00000020153.14"; transcript_id "a15040d2-dc03-4513-b434-e5e48c317cc6_FWD_pA_Ad3p";
chr10	80318708	80323409	chr10	79000000	81099999	Y	gene_id "ENSMUSG00000020131.14"; transcript_id "036b0ce5-1850-455d-b9d0-05b6701baf65_REV_pT_Ad5p_TSO3p";
chr10	80567124	80590324	chr10	79000000	81099999	Y	gene_id "10:80567000"; transcript_id "46cd0af0-f618-426b-99a7-2d151954d1aa_REV_pT_Ad5p_TSO3p";
chr10	80798732	80807648	chr10	79000000	81099999	Y	gene_id "ENSMUSG00000020211.15"; transcript_id "0d348320-bed1-44d9-b23b-19ed9db173a4_FWD_pA_Ad3p";
chr10	80798732	80807648	chr10	79000000	81099999	Y	gene_id "ENSMUSG00000020211.15"; transcript_id "76e43d57-5995-4161-a7ed-765b05408273_FWD_pA_Ad3p_TSO5p";
chr10	80798732	80807648	chr10	79000000	81099999	Y	gene_id "ENSMUSG00000020211.15"; transcript_id "b949b389-0dad-436f-a551-f3076e0d3d00_REV_pT_Ad5p_TSO3p";
chr10	81199191	81230785				N	gene_id "ENSMUSG00000034958.11"; transcript_id "35503215-7bcd-45d1-8e6d-ffc6893fd4ef_REV_pT_Ad5p";
chr10	81390311	81395392				N	gene_id "ENSMUSG00000078439.9"; transcript_id "724e8808-da61-4e96-abda-cd60ff86c384_FWD_pA_Ad3p";
chr10	81390311	81395392				N	gene_id "ENSMUSG00000078439.9"; transcript_id "a6f4889e-eebf-4310-918e-4fd3d3f458c6_REV_pT_Ad5p_TSO3p";
chr10	81704825	81879155	chr10	81700000	81899999	Y	gene_id "ENSMUSG00000112640.1"; transcript_id "69f91127-61db-4bc2-94fa-fbbaf8669811_FWD_pA_Ad3p";
chr10	81704825	81823898	chr10	81700000	81899999	Y	gene_id "ENSMUSG00000094076.7"; transcript_id "d2586de7-3ac7-47d3-add5-07efe111d140_FWD_pA_Ad3p";
chr10	82058417	82109091	chr10	82100000	83199999	N	gene_id "ENSMUSG00000112160.1"; transcript_id "ed0281d6-8a09-4f6a-8a8c-a11532d8605b_FWD_pA_Ad3p";
chr10	85829494	85889096	chr10	85400000	85999999	Y	gene_id "ENSMUSG00000001785.13"; transcript_id "db0d88ac-4faa-4491-8df9-c412d57b4d0b_FWD_pA-1_Ad3p";
chr10	115340742	115384410				N	gene_id "ENSMUSG00000069520.6"; transcript_id "103dce24-4cdd-4ffd-8654-28be0465220d_REV_pT_Ad5p";
chr10	117277331	117291940	chr10	116700000	118699999	Y	gene_id "ENSMUSG00000069516.8"; transcript_id "129fc38f-9535-4a09-ade3-d544174ab1c5_REV_pT_Ad5p_TSO3p";
chr10	127022332	127041513	chr10	126300000	128399999	Y	gene_id "ENSMUSG00000040521.11"; transcript_id "cb591d23-422d-4afb-a9fd-ee12f1a27b49_FWD_pA_Ad3p";
chr10	127190378	127311678	chr10	126300000	128399999	Y	gene_id "10:127190000"; transcript_id "7f97bdd4-3eba-43cd-a251-ebabdba87cea_FWD_pA_Ad3p_TSO5p";
chr10	128490860	128495096	chr10	128400000	128599999	Y	gene_id "ENSMUSG00000090841.2"; transcript_id "2d19ccf7-8fdd-46f0-ba46-d266449624fe_FWD_pA_Ad3p";
chr10	128490861	128495096	chr10	128400000	128599999	Y	gene_id "ENSMUSG00000090841.2"; transcript_id "fc568494-c51b-482f-85e3-069942b6dddf_REV_pT_Ad5p_TSO3p";
chr10	128548114	128583665	chr10	128400000	128599999	Y	gene_id "ENSMUSG00000093674.7"; transcript_id "dc220645-40b3-4d70-aa11-2f8ddcf6bb9d_REV_pT_Ad5p_TSO3p";
chr10	128913593	128923524	chr10	128800000	128999999	Y	gene_id "ENSMUSG00000090247.7"; transcript_id "2eb13268-ab31-4280-8e25-681a60b27c1a_FWD_pA_Ad3p";
chr10	128913593	128923524	chr10	128800000	128999999	Y	gene_id "ENSMUSG00000090247.7"; transcript_id "3e21752a-8b09-41fe-846b-53d8b3b01df0_REV_pT_Ad5p_TSO3p";
chr10	128913593	128923524	chr10	128800000	128999999	Y	gene_id "ENSMUSG00000090247.7"; transcript_id "6042a5c0-56be-4e4f-8725-d8a4fbb6a12f_FWD_pA_Ad3p";
chr11	3452365	3499350	chr11	3200000	3899999	Y	gene_id "ENSMUSG00000034579.17"; transcript_id "0aa107af-993b-4d96-908b-566b9f104832_FWD_pA_Ad3p";
chr11	3452365	3494166	chr11	3200000	3899999	Y	gene_id "ENSMUSG00000034579.17"; transcript_id "6a08b0da-8aa9-4c85-ba39-bae9940381a9_FWD_pA_Ad3p";
chr11	3452365	3494166	chr11	3200000	3899999	Y	gene_id "ENSMUSG00000034579.17"; transcript_id "79e6dcfb-ce75-4a55-862e-f41b98a2437f_REV_pT_Ad5p_TSO5p3p";
chr11	3452365	3494166	chr11	3200000	3899999	Y	gene_id "ENSMUSG00000034579.17"; transcript_id "875beeb7-ad9c-4e59-b581-e0a4139297f7_FWD_pA_Ad3p";
chr11	3452365	3499350	chr11	3200000	3899999	Y	gene_id "ENSMUSG00000034579.17"; transcript_id "9e6988c4-588a-4559-b93c-935c9cf2715b_FWD_pA_Ad3p";
chr11	3452365	3498304	chr11	3200000	3899999	Y	gene_id "ENSMUSG00000034579.17"; transcript_id "b210393e-a11c-4805-b5de-739bc3916ae2_REV_pT_Ad5p_TSO3p";
chr11	3452365	3490927	chr11	3200000	3899999	Y	gene_id "ENSMUSG00000034587.8"; transcript_id "c6e043c0-348b-431a-98ac-2923691b94ce_FWD_pA_Ad3p";
chr11	3452365	3499012	chr11	3200000	3899999	Y	gene_id "ENSMUSG00000034579.17"; transcript_id "e6650a4e-c06d-4cc6-8c37-7a506eada8be_FWD_pA_Ad3p";
chr11	3452365	3517348	chr11	3200000	3899999	Y	gene_id "ENSMUSG00000075702.9"; transcript_id "83a17800-e9f4-4e5c-ac21-20935981fb20_FWD_pA_Ad3p";
chr11	4902212	4919232	chr11	3900000	6199999	Y	gene_id "ENSMUSG00000034274.11"; transcript_id "5f197fb6-fe93-4b7a-9db4-396334d5b909_REV_pT_Ad5p_TSO3p";
chr11	5714971	5741146	chr11	3900000	6199999	Y	gene_id "ENSMUSG00000049680.17"; transcript_id "191237ea-8b3e-43e8-8c9c-ae82b03268f9_REV_pT_Ad5p_TSO3p";
chr11	5714987	5741146	chr11	3900000	6199999	Y	gene_id "11:5714000"; transcript_id "3fc65e18-f1d8-49aa-b984-48458b62b4b2_REV_pT_Ad5p";
chr11	5896637	5902087	chr11	3900000	6199999	Y	gene_id "ENSMUSG00000020469.8"; transcript_id "9e5f3d76-676e-4bd7-b48d-60afd526f354_REV_pT_Ad5p";
chr11	17051929	17200375	chr11	16800000	17199999	N	gene_id "ENSMUSG00000033953.10"; transcript_id "968504b9-2cbb-4691-ad04-1c0d277381d2_REV_pT_Ad5p-1_TSO3p";
chr11	18846592	19018985	chr11	17200000	19799999	Y	gene_id "ENSMUSG00000020160.18"; transcript_id "ff3ad6bf-adba-4a3d-a4fd-66c20e18a415_FWD_pA_Ad3p";
chr11	23068124	23333682	chr11	22000000	23599999	Y	gene_id "ENSMUSG00000056342.16"; transcript_id "30d9459e-c246-41bb-8cc5-6fd3031c47ea_REV_pT_Ad5p_TSO3p";
chr11	30446135	30649404	chr11	30500000	30699999	N	gene_id "ENSMUSG00000060923.5"; transcript_id "cee1e1bc-9d5e-4387-ad86-2ade73e43c7a_FWD_pA_Ad3p";
chr11	32283675	32297298	chr11	31500000	32599999	Y	gene_id "ENSMUSG00000069917.7"; transcript_id "dcc17cd3-534d-48ae-be10-a3abb1e1b6c1_FWD_pA_Ad3p";
chr11	32283675	32297298	chr11	31500000	32599999	Y	gene_id "ENSMUSG00000069919.7"; transcript_id "f2da3f02-537f-48b9-9008-1cf684802c2c_REV_pT_Ad5p_TSO3p";
chr11	32283922	32297298	chr11	31500000	32599999	Y	gene_id "ENSMUSG00000069917.7"; transcript_id "840f4f4a-1c7a-4b0e-9130-8c752e1b977d_REV_pT_Ad5p_TSO3p";
chr11	49203485	49263027	chr11	49100000	49399999	Y	gene_id "11:49203000"; transcript_id "91a7e60c-0315-4a25-a3d2-ce1726ba97fb_FWD_pA_Ad3p_TSO5p";
chr11	50813882	50841552	chr11	49400000	121699999	Y	gene_id "ENSMUSG00000044807.13"; transcript_id "ce1722f7-b321-43e7-b7b2-b547620c2f93_REV_pT_Ad5p_TSO3p";
chr11	50832529	50883814	chr11	49400000	121699999	Y	gene_id "ENSMUSG00000044296.10"; transcript_id "74e3b39f-0d3e-4dbd-8f0e-c22ea7eade8b_REV_pT_Ad5p_TSO3p";
chr11	59202486	59210048	chr11	49400000	121699999	Y	gene_id "ENSMUSG00000020441.6"; transcript_id "9408aa3a-f4e0-4305-bfa3-eca129458271_FWD_pA_Ad3p";
chr11	59202505	59210048	chr11	49400000	121699999	Y	gene_id "ENSMUSG00000020441.6"; transcript_id "a3c67959-d1b8-447b-9fe5-61a8743f15d2_REV_pT_Ad5p_TSO3p";
chr11	59407144	59472474	chr11	49400000	121699999	Y	gene_id "ENSMUSG00000009894.15"; transcript_id "dfc26710-5ba9-4fb7-afc2-46549bd89564_REV_pT_Ad5p_TSO5p3p";
chr11	69070936	69091011	chr11	49400000	121699999	Y	gene_id "ENSMUSG00000020894.16"; transcript_id "466f9032-2329-4e8a-bed5-62eda7f71af5_FWD_pA_Ad3p";
chr11	69326258	69342641	chr11	49400000	121699999	Y	gene_id "ENSMUSG00000018470.8"; transcript_id "fb5c9828-0f8a-4f1b-b273-fb6c5b8afaf6_REV_pT_Ad5p";
chr11	69364008	69413675	chr11	49400000	121699999	Y	gene_id "ENSMUSG00000018474.18"; transcript_id "408bc739-824b-4f24-af52-5b009048d57a_FWD_pA_Ad3p";
chr11	69364008	69395333	chr11	49400000	121699999	Y	gene_id "ENSMUSG00000044795.12"; transcript_id "ad7390ca-9e37-437c-82ca-6dbdda47b93c_REV_pT_Ad5p_TSO3p";
chr11	69683048	69693642	chr11	49400000	121699999	Y	gene_id "ENSMUSG00000018752.19"; transcript_id "0f3ac8b2-397e-4a42-9659-31f183f5df16_REV_pT_Ad5p_TSO3p";
chr11	69683048	69693642	chr11	49400000	121699999	Y	gene_id "ENSMUSG00000018752.19"; transcript_id "211534c9-966b-4fd4-a382-8d36f0f58050_FWD_pA_Ad3p";
chr11	69683048	69693642	chr11	49400000	121699999	Y	gene_id "ENSMUSG00000018752.19"; transcript_id "57dc35d5-d2fb-43d2-9300-9a4766ac3586_REV_pT_Ad5p_TSO3p";
chr11	70651850	70656493	chr11	49400000	121699999	Y	gene_id "ENSMUSG00000018293.4"; transcript_id "2d159adf-8e0b-4e32-bafa-a0ff3d9da45f_REV_pT_Ad5p_TSO3p";
chr11	70663771	70671616	chr11	49400000	121699999	Y	gene_id "ENSMUSG00000018287.12"; transcript_id "9da9c931-0205-4fbb-85d0-60db8d5abd9a_FWD_pA_Ad3p";
chr11	70663771	70670857	chr11	49400000	121699999	Y	gene_id "ENSMUSG00000018287.12"; transcript_id "e1f3f1dd-d8e9-409d-9955-e107c463de0e_REV_pT_Ad5p_TSO3p";
chr11	70663771	70671616	chr11	49400000	121699999	Y	gene_id "ENSMUSG00000018287.12"; transcript_id "f292aa17-d67c-4761-a074-44aba09e9984_FWD_pA_Ad3p";
chr11	75532138	75599232	chr11	49400000	121699999	Y	gene_id "ENSMUSG00000038178.16"; transcript_id "fb14993a-72ef-4d05-a572-62234150ce69_REV_pT_Ad5p_TSO3p";
chr11	75679311	75765571	chr11	49400000	121699999	Y	gene_id "ENSMUSG00000020849.13"; transcript_id "0041f0e5-b342-47b5-bc79-99e3c845ad19_REV_pT_Ad5p_TSO3p";
chr11	75679311	75765571	chr11	49400000	121699999	Y	gene_id "ENSMUSG00000020849.13"; transcript_id "347a20ec-57fe-4d84-a459-790b2cd4d444_REV_pT_Ad5p_TSO3p";
chr11	75679311	75765571	chr11	49400000	121699999	Y	gene_id "ENSMUSG00000020849.13"; transcript_id "b847776d-c9ca-4ae8-b428-703877ff594f_FWD_pA_Ad3p";
chr11	76179671	76218666	chr11	49400000	121699999	Y	gene_id "ENSMUSG00000069808.13"; transcript_id "5b4fe6ee-c044-4ac1-af44-6d8996d7b520_REV_pT_Ad5p_TSO3p";
chr11	76202015	76218666	chr11	49400000	121699999	Y	gene_id "ENSMUSG00000069808.13"; transcript_id "fa0ab694-14a6-40c8-944e-79301640caac_FWD_pA_Ad3p";
chr11	78343506	78502324	chr11	49400000	121699999	Y	gene_id "ENSMUSG00000017344.4"; transcript_id "2eb93ab4-1134-471b-846f-9cfbca559417_REV_pT_Ad5p_TSO3p";
chr11	80063683	80142175	chr11	49400000	121699999	Y	gene_id "ENSMUSG00000046909.9"; transcript_id "f3956ba8-d400-4a09-823e-08a9bd880dce_FWD_pA_Ad3p_TSO5p";
chr11	93949814	93968521	chr11	49400000	121699999	Y	gene_id "ENSMUSG00000020857.11"; transcript_id "49da11c8-8812-4045-a9de-8dbf3bf6fb33_FWD_pA_Ad3p";
chr11	93949814	93965936	chr11	49400000	121699999	Y	gene_id "ENSMUSG00000020857.11"; transcript_id "66c25f8a-331a-4e1f-b1eb-d5216e6a93ab_REV_pT_Ad5p_TSO3p";
chr11	93949814	93965936	chr11	49400000	121699999	Y	gene_id "ENSMUSG00000091228.1"; transcript_id "821b9420-1fd9-40e8-b794-9df77d3fe566_FWD_pA_Ad3p";
chr11	93949814	93966043	chr11	49400000	121699999	Y	gene_id "ENSMUSG00000037601.11"; transcript_id "8af78dd1-a9b3-4503-b754-e95d0304a7ba_REV_pT_Ad5p_TSO3p";
chr11	93949814	93965936	chr11	49400000	121699999	Y	gene_id "ENSMUSG00000091228.1"; transcript_id "d19f1164-1986-4c32-9a07-24dc9042c25c_FWD_pA_Ad3p";
chr11	95310429	95381872	chr11	49400000	121699999	Y	gene_id "ENSMUSG00000038893.12"; transcript_id "28999206-a996-450a-90d0-643ed69cbc88_FWD_pA_Ad3p";
chr11	96918941	96943779	chr11	49400000	121699999	Y	gene_id "ENSMUSG00000018659.12"; transcript_id "6be51b72-33dc-4c72-be87-99d9dbd2181c_REV_pT_Ad5p_TSO3p";
chr11	96920676	96943779	chr11	49400000	121699999	Y	gene_id "ENSMUSG00000018659.12"; transcript_id "2833110e-8bf7-4976-ad66-dd9517d49a60_FWD_pA_Ad3p";
chr11	96920676	96943779	chr11	49400000	121699999	Y	gene_id "ENSMUSG00000018659.12"; transcript_id "a1859bfe-5a47-426e-8af1-6fffacc9f36b_REV_pT_Ad5p";
chr11	97098071	97138964	chr11	49400000	121699999	Y	gene_id "ENSMUSG00000001444.2"; transcript_id "1774e06e-ede2-4927-a9f9-cd1d643a2c1b_FWD_pA_Ad3p";
chr11	97770660	97782382	chr11	49400000	121699999	Y	gene_id "ENSMUSG00000071415.6"; transcript_id "66f0d962-c431-4809-b3db-e4e21d5f4414_FWD_pA_Ad3p";
chr11	100319986	100336996	chr11	49400000	121699999	Y	gene_id "ENSMUSG00000017165.1"; transcript_id "016768de-3f48-4558-9e8b-af09490c3b0e_FWD_pA_Ad3p";
chr11	101316213	101329702	chr11	49400000	121699999	Y	gene_id "ENSMUSG00000078652.9"; transcript_id "138e28a6-d29b-454b-a7d5-f095a61a9b0e_FWD_pA_Ad3p";
chr11	101316213	101329494	chr11	49400000	121699999	Y	gene_id "ENSMUSG00000078652.9"; transcript_id "7395d15f-433f-4633-8799-60fae8217c2f_REV_pT_Ad5p_TSO3p";
chr11	101999652	102035084	chr11	49400000	121699999	Y	gene_id "ENSMUSG00000052373.14"; transcript_id "0754d39b-59d4-4bd6-b6d4-c53458f4fc93_REV_pT_Ad5p_TSO3p";
chr11	102467033	102508447	chr11	49400000	121699999	Y	gene_id "ENSMUSG00000034621.14"; transcript_id "24c8ee51-69eb-4abd-b3ee-af13936d0b4b_FWD_pA_Ad3p";
chr11	106690454	106779473	chr11	49400000	121699999	Y	gene_id "ENSMUSG00000020718.12"; transcript_id "bd2f0a59-ec3c-46ac-b944-ef542ac2843d_REV_pT_Ad5p_TSO3p";
chr11	106699622	106775950	chr11	49400000	121699999	Y	gene_id "ENSMUSG00000020718.12"; transcript_id "1255e194-55e3-4682-adfc-562d0c3f205c_REV_pT_Ad5p_TSO3p";
chr11	107703218	107742079	chr11	49400000	121699999	Y	gene_id "ENSMUSG00000020722.5"; transcript_id "fae1d367-4e5e-4bd1-aefe-6a50cbaed2df_REV_pT_Ad5p_TSO3p";
chr11	115497353	115536229	chr11	49400000	121699999	Y	gene_id "ENSMUSG00000020737.12"; transcript_id "d291d8d5-3cf2-4789-9934-d5b94264345d_REV_pT_Ad5p_TSO3p";
chr11	115498032	115536229	chr11	49400000	121699999	Y	gene_id "ENSMUSG00000020737.12"; transcript_id "2a57c86b-3038-4361-b324-eb006adddeab_FWD_pA_Ad3p";
chr11	116022853	116132901	chr11	49400000	121699999	Y	gene_id "ENSMUSG00000016559.14"; transcript_id "88063cd4-cd81-4b97-aac0-537dc2643ef6_REV_pT_Ad5p_TSO3p";
chr11	116198898	116220287	chr11	49400000	121699999	Y	gene_id "ENSMUSG00000092300.7"; transcript_id "7cac1294-dddf-45dc-bc4f-64c9f50f533f_FWD_pA_Ad3p";
chr11	116843561	116854256	chr11	49400000	121699999	Y	gene_id "ENSMUSG00000090266.10"; transcript_id "cc84b9d7-9831-49d2-a1e8-bb248049e0ba_FWD_pA_Ad3p";
chr11	117809668	117839050	chr11	49400000	121699999	Y	gene_id "ENSMUSG00000048277.15"; transcript_id "077d5c2a-ba98-475c-a189-c7a56f7d5af8_FWD_pA_Ad3p";
chr11	117809668	117839050	chr11	49400000	121699999	Y	gene_id "ENSMUSG00000017718.15"; transcript_id "23f5a4d1-fa16-4f41-9cd9-4d33cbbfbd1a_FWD_pA_Ad3p";
chr11	117809668	117839904	chr11	49400000	121699999	Y	gene_id "ENSMUSG00000017718.15"; transcript_id "256caa6e-b0ed-4f0d-987a-de2e2c392f53_REV_pT-1_Ad5p";
chr11	117809668	117839050	chr11	49400000	121699999	Y	gene_id "ENSMUSG00000017718.15"; transcript_id "63fc4098-ba0c-4ead-bff5-8be83c60951f_REV_pT_Ad5p_TSO3p";
chr11	117809668	117839050	chr11	49400000	121699999	Y	gene_id "ENSMUSG00000017718.15"; transcript_id "8871fe0f-62bc-4300-aef3-e6b8a5196ce8_REV_pT_Ad5p_TSO3p";
chr11	117809668	117839050	chr11	49400000	121699999	Y	gene_id "ENSMUSG00000017718.15"; transcript_id "bf8ec865-eb85-40c6-be7e-e8af89cbc324_REV_pT_Ad5p_TSO3p";
chr11	117809668	117839050	chr11	49400000	121699999	Y	gene_id "ENSMUSG00000017718.15"; transcript_id "ec258fb8-1780-49be-8b3a-0e187c455c61_FWD_pA_Ad3p";
chr11	120348678	120368168	chr11	49400000	121699999	Y	gene_id "ENSMUSG00000025380.2"; transcript_id "9088a665-7701-41dc-8dc6-2084a76aca64_FWD_pA_Ad3p";
chr11	120725425	120730904	chr11	49400000	121699999	Y	gene_id "ENSMUSG00000039450.11"; transcript_id "7b851662-50b3-4e9f-a369-ab0aa203c866_REV_pT_Ad5p_TSO3p";
chr11	120725425	120730904	chr11	49400000	121699999	Y	gene_id "ENSMUSG00000039450.11"; transcript_id "7e556800-f84b-4b9c-b43c-55a0a6f57463_FWD_pA_Ad3p";
chr12	17786146	17938883	chr12	17900000	18099999	N	gene_id "ENSMUSG00000113536.1"; transcript_id "cc9cd6f3-cdde-4055-9c57-d69c47dfc187_FWD_pA_Ad3p";
chr12	20990459	21045260				N	gene_id "ENSMUSG00000116627.1"; transcript_id "2909ba36-7c40-4021-8316-21daf112866f_FWD_pA_Ad3p";
chr12	21252118	21286185	chr12	21100000	21599999	Y	gene_id "ENSMUSG00000062352.15"; transcript_id "0aaf5e13-afd8-4b09-a8a7-96f20ea76796_REV_pT_Ad5p_TSO3p";
chr12	21252118	21286185	chr12	21100000	21599999	Y	gene_id "ENSMUSG00000062352.15"; transcript_id "44325472-ad73-4d2d-a762-769e5f4e12ab_REV_pT_Ad5p_TSO3p";
chr12	28675231	28867491	chr12	27200000	29099999	Y	gene_id "ENSMUSG00000036613.8"; transcript_id "706ccfe7-79cb-470e-9dfd-1e8e7ec5aadf_REV_pT_Ad5p_TSO3p";
chr12	36014960	36156786	chr12	36100000	36399999	N	gene_id "ENSMUSG00000020577.17"; transcript_id "ab2971e9-2ab2-4105-9d64-3d9edbd4deb9_FWD_pA_Ad3p_TSO5p";
chr12	44269167	44390070	chr12	44100000	44299999	N	gene_id "12:44269000"; transcript_id "0f1cbaf4-5b87-4082-9dcf-4566603fbff1_FWD_pA_Ad3p";
chr12	54673466	54795484	chr12	54700000	54899999	N	gene_id "12:54673000"; transcript_id "68670b0f-c3af-4f0b-8015-50b546a82403_FWD_pA_Ad3p";
chr12	55080526	55188336	chr12	54900000	55099999	N	gene_id "ENSMUSG00000112449.1"; transcript_id "d3f94ed6-8232-484a-a399-2f555abc1fef_FWD_pA_Ad3p";
chr12	55080526	55262603	chr12	54900000	55099999	N	gene_id "ENSMUSG00000079108.6"; transcript_id "fa343036-5f5e-4e73-bc66-5da5c35e2aa1_FWD_pA_Ad3p";
chr12	55155370	55262603	chr12	55100000	55599999	Y	gene_id "ENSMUSG00000079108.6"; transcript_id "8f1ff0d3-ddac-473c-87c3-977f2357e7eb_REV_pT_Ad5p_TSO3p";
chr12	55217176	55298514	chr12	55100000	55599999	Y	gene_id "ENSMUSG00000112690.2"; transcript_id "34f1c760-cf93-4089-a0a7-e7004345e98a_REV_pT_Ad5p_TSO3p";
chr12	55230441	55279325	chr12	55100000	55599999	Y	gene_id "ENSMUSG00000079108.6"; transcript_id "250b95a4-7212-40ff-8295-a0b4ba24f0cf_REV_pT-1_Ad5p";
chr12	55230441	55279325	chr12	55100000	55599999	Y	gene_id "ENSMUSG00000079108.6"; transcript_id "b4d5bba5-ef35-48c2-a430-089042e35c89_REV_pT_Ad5p_TSO3p";
chr12	70347643	70467626	chr12	70300000	72299999	Y	gene_id "ENSMUSG00000021072.12"; transcript_id "8f4f4eb3-4435-435b-ac1c-493b10a3e775_FWD_pA_Ad3p";
chr12	72612573	72664806	chr12	72300000	72799999	Y	gene_id "ENSMUSG00000109482.2"; transcript_id "1bdc033e-8d03-4f7b-ad62-5db776696b92_FWD_pA_Ad3p";
chr12	72612573	72664806	chr12	72300000	72799999	Y	gene_id "ENSMUSG00000021094.10"; transcript_id "600ad822-f9c1-49ff-b824-1ff3c2a0942f_REV_pT_Ad5p_TSO3p";
chr12	76287894	76369602	chr12	75400000	76499999	Y	gene_id "ENSMUSG00000056459.14"; transcript_id "73faeae3-4dd3-47aa-8b3c-5eb1fdcf609a_REV_pT_Ad5p_TSO3p";
chr12	78843002	79089649	chr12	78700000	78899999	N	gene_id "ENSMUSG00000021114.9"; transcript_id "1e316105-2419-42bd-81ba-cd0de1f6fb42_FWD_pA_Ad3p";
chr12	81359026	81532877	chr12	79900000	82099999	Y	gene_id "ENSMUSG00000091803.7"; transcript_id "3b3ac641-ab16-4d2f-a24c-c364aa44784d_REV_pT_Ad5p_TSO3p";
chr12	81359026	81532877	chr12	79900000	82099999	Y	gene_id "ENSMUSG00000091803.7"; transcript_id "428bbb30-e41f-4923-afb2-17a5027f3b19_FWD_pA_Ad3p";
chr12	81472093	81532877	chr12	79900000	82099999	Y	gene_id "ENSMUSG00000091803.7"; transcript_id "40abe79c-5c88-4b49-9000-ba0db433a6ce_FWD_pA_Ad3p_TSO5p";
chr12	84285365	84343723	chr12	84100000	84299999	N	gene_id "ENSMUSG00000042472.11"; transcript_id "3e56a7e2-7cba-43a2-bf70-ae59b31145b0_FWD_pA_Ad3p_TSO5p";
chr12	84285365	84343723	chr12	84100000	84299999	N	gene_id "ENSMUSG00000042472.11"; transcript_id "f969189d-8b65-471f-8ddf-a073281c3f45_FWD_pA_Ad3p_TSO5p";
chr12	84285365	84343723	chr12	84100000	84299999	N	gene_id "ENSMUSG00000042472.11"; transcript_id "fa6a0633-6ec4-43c8-8454-4475b695ea0a_FWD_pA_Ad3p";
chr12	84305984	84321889				N	gene_id "ENSMUSG00000072946.12"; transcript_id "185f9512-689d-4c67-b480-63398a871b23_REV_pT_Ad5p_TSO3p";
chr12	102460110	102497907	chr12	102300000	102499999	Y	gene_id "ENSMUSG00000021192.16"; transcript_id "a22bcf8f-5402-4fa1-a8ea-1401c7d745c0_REV_pT_Ad5p_TSO3p";
chr12	105021359	105040856				N	gene_id "12:105021000"; transcript_id "cda16a6a-8419-44dc-b289-20417508a9e0_FWD_pA_Ad3p";
chr12	110807798	110845216	chr12	110200000	111599999	Y	gene_id "ENSMUSG00000056458.16"; transcript_id "b2b1b8bc-e880-4ca4-a250-68a7c34b2b67_FWD_pA_Ad3p";
chr12	111713261	111794897	chr12	111600000	114399999	Y	gene_id "ENSMUSG00000021288.19"; transcript_id "7b86ddb2-9843-46c4-9cc6-ab78f45ebde1_FWD_pA_Ad3p";
chr12	111713284	111794897	chr12	111600000	114399999	Y	gene_id "ENSMUSG00000021288.19"; transcript_id "4ab0069f-6448-40ab-8631-948c6fd1877f_FWD_pA_Ad3p_TSO5p";
chr12	111713284	111794897	chr12	111600000	114399999	Y	gene_id "ENSMUSG00000021288.19"; transcript_id "52a4e24f-fd0b-41cd-bbba-c0396b2625e0_FWD_pA_Ad3p";
chr12	111713284	111794897	chr12	111600000	114399999	Y	gene_id "ENSMUSG00000021288.19"; transcript_id "6ab1a940-68c4-4fb8-85bd-093ddd857c8c_FWD_pA_Ad3p";
chr12	112413915	112511172	chr12	111600000	114399999	Y	gene_id "ENSMUSG00000054013.6"; transcript_id "b9cb046d-4f0c-40be-b399-0ebaa6e227ec_FWD_pA_Ad3p";
chr12	114611936	114616318	chr12	114600000	114899999	Y	gene_id "12:114611000"; transcript_id "845ad5b0-38ec-427d-8017-89fafc79c8c1_REV_pT_Ad5p_TSO3p";
chr12	117602039	117710854	chr12	117500000	117699999	N	gene_id "ENSMUSG00000041992.9"; transcript_id "4b063811-aec8-42db-9d61-d911647a4dfa_FWD_pA_Ad3p";
chr12	117602039	117757224	chr12	117500000	117699999	N	gene_id "ENSMUSG00000041992.9"; transcript_id "a7b84400-310e-4d1e-803d-87630d444e34_REV_pT_Ad5p_TSO3p";
chr13	4436278	4583862	chr13	4000000	6499999	Y	gene_id "ENSMUSG00000021210.16"; transcript_id "5eed6a87-8396-4087-885d-c8c7938fa076_REV_pT_Ad5p_TSO3p";
chr13	4436278	4583862	chr13	4000000	6499999	Y	gene_id "ENSMUSG00000021210.16"; transcript_id "8a3b3b51-df8e-4788-8138-23fa71393e3b_REV_pT_Ad5p_TSO3p";
chr13	33879924	33931691				N	gene_id "ENSMUSG00000060147.15"; transcript_id "488f2b21-10f4-4893-9c1f-65bf8bb9705a_REV_pT_Ad5p_TSO3p";
chr13	33879924	33931691				N	gene_id "ENSMUSG00000052180.15"; transcript_id "7387c419-be8d-4aa1-8e9f-f3ae86cd5939_REV_pT_Ad5p_TSO3p";
chr13	33879924	33931691				N	gene_id "ENSMUSG00000052180.15"; transcript_id "d439a2c5-fb83-4ea1-82ec-7871fa823940_REV_pT_Ad5p_TSO3p";
chr13	33880058	33931691				N	gene_id "ENSMUSG00000052180.15"; transcript_id "7387c419-be8d-4aa1-8e9f-f3ae86cd5939_REV_pT_Ad5p-1_TSO3p";
chr13	33880058	33931691				N	gene_id "ENSMUSG00000052180.15"; transcript_id "d439a2c5-fb83-4ea1-82ec-7871fa823940_REV_pT_Ad5p-1_TSO3p";
chr13	34074274	34130239	chr13	34100000	38799999	N	gene_id "ENSMUSG00000045136.6"; transcript_id "7567bf93-5aa3-4cb5-8842-da795190c462_FWD_pA_Ad3p_TSO5p";
chr13	34074274	34130239	chr13	34100000	38799999	N	gene_id "ENSMUSG00000058672.7"; transcript_id "bae24420-e297-4fed-951f-33bdb64d3dc1_FWD_pA_Ad3p";
chr13	34074274	34089027				N	gene_id "ENSMUSG00000058672.7"; transcript_id "80489e48-1ae4-43aa-aa7a-ffd9fb87904c_FWD_pA_Ad3p";
chr13	34074274	34089027				N	gene_id "13:34074000"; transcript_id "84022487-527a-4e34-980a-b7f99cfc5aea_REV_pT_Ad5p_TSO3p";
chr13	34075285	34130354	chr13	34100000	38799999	N	gene_id "ENSMUSG00000058672.7"; transcript_id "2c48e57a-7a97-4532-bb98-39632cb1332d_FWD_pA_Ad3p";
chr13	34947016	34993184	chr13	34100000	38799999	Y	gene_id "ENSMUSG00000021416.11"; transcript_id "93ab61dd-694b-489e-8f76-11199dc689ee_REV_pT_Ad5p_TSO3p";
chr13	34948084	34993184	chr13	34100000	38799999	Y	gene_id "ENSMUSG00000021416.11"; transcript_id "71064300-d344-4771-a8a1-e0a882aaacc3_FWD_pA_Ad3p";
chr13	41250164	41370908	chr13	40900000	47399999	Y	gene_id "13:41250000"; transcript_id "b9ecfd41-0926-45d7-a2eb-756724f27207_FWD_pA_Ad3p";
chr13	49202950	49248154	chr13	48600000	49599999	Y	gene_id "ENSMUSG00000037960.11"; transcript_id "60f716ce-e82b-4a74-84c5-397b90544c0d_REV_pT_Ad5p_TSO3p";
chr13	49202950	49248706	chr13	48600000	49599999	Y	gene_id "ENSMUSG00000037960.11"; transcript_id "c9100b19-7522-4854-9d7b-86940a6ab5a2_FWD_pA_Ad3p_TSO5p";
chr13	54575047	54591158	chr13	54200000	54599999	Y	gene_id "ENSMUSG00000025870.10"; transcript_id "e14cb855-55c8-4f3d-b270-84b32bb30336_REV_pT_Ad5p_TSO3p";
chr13	55600065	55632411	chr13	54600000	55899999	Y	gene_id "ENSMUSG00000021501.4"; transcript_id "f1af4257-fa79-45d2-a0e6-6bb94baff9b7_FWD_pA_Ad3p";
chr13	55727368	55808998	chr13	54600000	55899999	Y	gene_id "ENSMUSG00000021499.12"; transcript_id "0a0c0c3b-59de-4f7c-98f6-cc7a5f41ad24_FWD_pA_Ad3p";
chr13	58238649	58402487	chr13	58100000	58699999	Y	gene_id "ENSMUSG00000021546.18"; transcript_id "e3a60773-ddf2-4461-b33c-76834171a279_REV_pT_Ad5p_TSO5p3p";
chr13	62129900	62273287	chr13	62100000	62299999	Y	gene_id "ENSMUSG00000074867.4"; transcript_id "ec6e49b2-1b3a-4001-8344-0b814ffbea9a_REV_pT_Ad5p_TSO3p";
chr13	62454913	62558635	chr13	62300000	62499999	N	gene_id "ENSMUSG00000113450.1"; transcript_id "8546c209-e603-416a-93b2-66cf7e05d3c4_REV_pT_Ad5p_TSO3p";
chr13	62456320	62558635	chr13	62300000	62499999	N	gene_id "ENSMUSG00000074865.11"; transcript_id "4ea7fcbf-9261-4801-93e5-94d1dc15da7b_REV_pT_Ad5p_TSO3p";
chr13	62456320	62558635	chr13	62300000	62499999	N	gene_id "ENSMUSG00000074865.11"; transcript_id "ed410953-a3c0-4537-a308-256cfc1f63a7_FWD_pA_Ad3p";
chr13	62724166	62785784	chr13	62700000	62899999	Y	gene_id "ENSMUSG00000091183.5"; transcript_id "40bbfe4e-b58a-4345-bc80-26b703678224_FWD_pA_Ad3p";
chr13	62738014	62785784	chr13	62700000	62899999	Y	gene_id "ENSMUSG00000091183.5"; transcript_id "c48df7e2-62b9-405a-b83e-02cc1f1d6e3b_REV_pT_Ad5p_TSO3p";
chr13	64275280	64312574	chr13	62900000	64399999	Y	gene_id "ENSMUSG00000021482.10"; transcript_id "5af13475-3f51-4bbf-8662-335539374a2d_FWD_pA_Ad3p";
chr13	64275280	64312574	chr13	62900000	64399999	Y	gene_id "ENSMUSG00000021482.10"; transcript_id "8832350e-7c81-4085-9ccb-3ef31fa4eab9_FWD_pA_Ad3p_TSO5p";
chr13	67257471	67332560	chr13	67000000	67999999	Y	gene_id "ENSMUSG00000055480.7"; transcript_id "5fbd5592-ce04-43b7-bca3-c1555869eac1_REV_pT_Ad5p_TSO3p";
chr13	67521258	67609687	chr13	67000000	67999999	Y	gene_id "13:67521000"; transcript_id "0560b5f6-e417-40b0-892c-d4765f38d380_FWD_pA_Ad3p";
chr13	67596720	67683516	chr13	67000000	67999999	Y	gene_id "13:67596000"; transcript_id "497f1872-f377-4dfd-a139-37f68fe37724_FWD_pA_Ad3p";
chr13	74372736	74462695	chr13	73400000	74499999	Y	gene_id "ENSMUSG00000069184.4"; transcript_id "fdb36e31-ad8e-40bf-9a33-8aa84da92d6a_FWD_pA_Ad3p";
chr13	74447709	74493992	chr13	73400000	74499999	Y	gene_id "ENSMUSG00000112964.1"; transcript_id "f3ea31b0-a961-4a0d-8641-4da5851e4646_FWD_pA_Ad3p";
chr13	74448279	74483933	chr13	73400000	74499999	Y	gene_id "ENSMUSG00000069208.9"; transcript_id "92d6874a-9863-4e99-9594-e4fcf1a1d737_REV_pT_Ad5p_TSO3p";
chr13	74448461	74493992	chr13	73400000	74499999	Y	gene_id "ENSMUSG00000069208.9"; transcript_id "5303c6c4-b422-46ea-a773-85e7a92c1a5c_REV_pT_Ad5p_TSO3p";
chr13	81657792	81750521	chr13	81000000	81899999	Y	gene_id "ENSMUSG00000035840.7"; transcript_id "c66a05d9-a0bc-4f8b-a167-72e0e4d77e1c_FWD_pA_Ad3p";
chr13	92415017	92484015				N	gene_id "ENSMUSG00000034334.8"; transcript_id "2b04fb32-2c66-41b8-8f8c-36a980f28ef8_FWD_pA_Ad3p";
chr13	92415270	92484015				N	gene_id "ENSMUSG00000034334.8"; transcript_id "975bde5d-0628-4a80-b441-484324af047e_REV_pT_Ad5p_TSO3p";
chr13	100109017	100132467	chr13	99500000	100899999	Y	gene_id "ENSMUSG00000021645.16"; transcript_id "97653c18-4cd0-4fce-b3fe-ba85e6fcb979_REV_pT_Ad5p_TSO3p";
chr13	100109023	100132467	chr13	99500000	100899999	Y	gene_id "ENSMUSG00000021645.16"; transcript_id "2b27214a-f5c6-411f-8666-27d2d1920346_FWD_pA_Ad3p";
chr13	100178245	100245756	chr13	99500000	100899999	Y	gene_id "ENSMUSG00000071203.6"; transcript_id "a6c025e0-ee76-42eb-a18b-6088e9274332_FWD_pA_Ad3p";
chr13	107996285	108049172	chr13	107900000	109099999	Y	gene_id "ENSMUSG00000071180.5"; transcript_id "d3193008-6ab3-4dab-8ee1-c67d8273de0d_FWD_pA-1_Ad3p";
chr13	119462768	119610458	chr13	119600000	119899999	N	gene_id "ENSMUSG00000074634.12"; transcript_id "4db99f38-3f69-4dd7-b2d6-8e6082c3ef3a_FWD_pA_Ad3p";
chr14	20694968	20704425	chr14	20500000	21099999	Y	gene_id "ENSMUSG00000039357.2"; transcript_id "da15fc9b-0b6e-441e-bafb-6ebbbdd86b5c_REV_pT_Ad5p_TSO3p";
chr14	25459980	25582158	chr14	24900000	26699999	Y	gene_id "ENSMUSG00000007817.15"; transcript_id "37404ed4-de85-4e14-8a65-5f12026b0b53_REV_pT_Ad5p_TSO3p";
chr14	31578383	31626412	chr14	31300000	33399999	Y	gene_id "ENSMUSG00000115022.1"; transcript_id "0bb9b017-08bb-4e0e-a0f8-1d0d1b643b20_REV_pT_Ad5p_TSO3p";
chr14	46775670	46822156	chr14	46600000	47199999	Y	gene_id "ENSMUSG00000015759.11"; transcript_id "7999cecd-3228-4bcc-96d0-733d4dac8c7a_REV_pT_Ad5p_TSO3p";
chr14	46775670	46822156	chr14	46600000	47199999	Y	gene_id "ENSMUSG00000015759.11"; transcript_id "ed309ea5-9bd0-4a27-87cd-641f65b4f63b_FWD_pA_Ad3p";
chr14	48658171	48673899	chr14	47900000	49799999	Y	gene_id "ENSMUSG00000021848.16"; transcript_id "342c01bf-c046-49db-baab-91f448e1563e_REV_pT_Ad5p_TSO3p";
chr14	55672258	55687861	chr14	54800000	56599999	Y	gene_id "ENSMUSG00000002326.6"; transcript_id "31fc4acd-5589-48f8-b3e5-9711907ff32c_FWD_pA_Ad3p";
chr14	55672258	55687861	chr14	54800000	56599999	Y	gene_id "ENSMUSG00000002326.6"; transcript_id "36b71a31-8e34-430e-b095-5e62f3282524_REV_pT_Ad5p_TSO3p";
chr14	55672258	55687861	chr14	54800000	56599999	Y	gene_id "ENSMUSG00000002326.6"; transcript_id "ccb01470-a877-4d0b-a7e4-b4f112855ccf_REV_pT_Ad5p_TSO3p";
chr14	61221059	61360320	chr14	60000000	67599999	Y	gene_id "ENSMUSG00000035296.14"; transcript_id "2de7d699-3884-4a1f-baf3-c7d8cc399d14_FWD_pA_Ad3p";
chr14	61292712	61360408	chr14	60000000	67599999	Y	gene_id "ENSMUSG00000021928.9"; transcript_id "175ee0ac-e2ad-4260-8127-9f8f9187791a_FWD_pA_Ad3p";
chr14	66865081	67008856	chr14	60000000	67599999	Y	gene_id "ENSMUSG00000022051.15"; transcript_id "6b432fed-8668-49ef-99c7-4330a604aac9_REV_pT_Ad5p_TSO5p3p";
chr14	70647302	70659244	chr14	69800000	71199999	Y	gene_id "ENSMUSG00000047911.6"; transcript_id "9421aa11-ac61-41db-ab96-0c0469dee299_FWD_pA_Ad3p";
chr14	105109165	105141294	chr14	105100000	105299999	Y	gene_id "ENSMUSG00000022119.15"; transcript_id "87c7f341-111f-4ba8-ae18-1473c5b92c95_REV_pT_Ad5p_TSO3p";
chr14	105109390	105150333	chr14	105100000	105299999	Y	gene_id "ENSMUSG00000022119.15"; transcript_id "0d308808-d4a5-4f8f-952f-71186d5b1ad0_REV_pT_Ad5p_TSO3p";
chr14	105109390	105151436	chr14	105100000	105299999	Y	gene_id "ENSMUSG00000022119.15"; transcript_id "52297fd3-2413-4d60-a501-8e0e2446ac1f_FWD_pA_Ad3p";
chr14	120275707	120504222	chr14	120100000	120299999	N	gene_id "ENSMUSG00000022139.17"; transcript_id "d707ac42-c553-4e44-b7e3-8f86f7695389_FWD_pA_Ad3p";
chr14	122365239	122451115	chr14	121200000	122499999	Y	gene_id "ENSMUSG00000115263.1"; transcript_id "0fda27aa-98f1-43fa-ab0c-d7eba5ba01f6_REV_pT_Ad5p_TSO3p";
chr14	122365239	122451115	chr14	121200000	122499999	Y	gene_id "ENSMUSG00000115263.1"; transcript_id "530d8e27-7ec1-4771-80ab-cba39b81f204_REV_pT_Ad5p_TSO3p";
chr15	3965445	3995744	chr15	3900000	4199999	Y	gene_id "ENSMUSG00000022184.8"; transcript_id "3b7b85eb-b2fa-4f47-8641-32dd27c961cf_REV_pT_Ad5p_TSO3p";
chr15	3965445	3995744	chr15	3900000	4199999	Y	gene_id "ENSMUSG00000022184.8"; transcript_id "43417357-d6d1-4af6-971e-ec7e933cb4df_REV_pT_Ad5p_TSO3p";
chr15	3965445	3995744	chr15	3900000	4199999	Y	gene_id "ENSMUSG00000022184.8"; transcript_id "6d9789fc-b37c-435b-b101-6e85cd640a7d_FWD_pA_Ad3p";
chr15	3965445	3995744	chr15	3900000	4199999	Y	gene_id "ENSMUSG00000041935.10"; transcript_id "794aa4b9-1034-4026-ab1f-c8b67a611fa0_FWD_pA_Ad3p_TSO5p";
chr15	3965445	3995744	chr15	3900000	4199999	Y	gene_id "ENSMUSG00000022184.8"; transcript_id "e3a57da6-f3bf-418c-994c-fe2ed4973480_FWD_pA_Ad3p";
chr15	20833295	21237793	chr15	14000000	24199999	Y	gene_id "ENSMUSG00000040452.9"; transcript_id "1ca0ea06-51a2-4e6d-a6ba-6d9072462d0a_REV_pT_Ad5p_TSO5p3p";
chr15	36174033	36183933	chr15	34800000	36999999	Y	gene_id "ENSMUSG00000045996.12"; transcript_id "3e77dba9-d197-4ddb-9d91-0554e25b7a04_FWD_pA_Ad3p";
chr15	51786558	51991747	chr15	51500000	51899999	N	gene_id "ENSMUSG00000022312.11"; transcript_id "2de96a55-2a73-4e61-9163-f9313cd59511_REV_pT_Ad5p_TSO3p";
chr15	58022270	58076214	chr15	58000000	58699999	Y	gene_id "ENSMUSG00000022362.13"; transcript_id "3b21b2f7-72da-40b3-a8b7-2de850decbe4_FWD_pA_Ad3p";
chr15	58022270	58076469	chr15	58000000	58699999	Y	gene_id "ENSMUSG00000101892.1"; transcript_id "577e7dda-4bbd-4981-b992-e995e97b7f46_FWD_pA_Ad3p";
chr15	58022270	58076214	chr15	58000000	58699999	Y	gene_id "ENSMUSG00000022362.13"; transcript_id "8c675cf3-0f9a-4ac3-89d8-ae4e38b71280_REV_pT_Ad5p_TSO3p";
chr15	58022270	58076214	chr15	58000000	58699999	Y	gene_id "ENSMUSG00000022362.13"; transcript_id "b797d77d-8f28-4ecb-83a8-959c0be3b3ec_FWD_pA_Ad3p_TSO5p";
chr15	58022270	58052596	chr15	58000000	58699999	Y	gene_id "ENSMUSG00000101892.1"; transcript_id "b9adf397-77f5-4ecf-b30e-d4c5564f4b02_REV_pT_Ad5p_TSO3p";
chr15	58022270	58076469	chr15	58000000	58699999	Y	gene_id "ENSMUSG00000022361.14"; transcript_id "eab4f2c7-2398-4de8-8dae-a8b23a7d66cb_REV_pT_Ad5p_TSO3p";
chr15	76721465	76723824	chr15	75300000	89399999	Y	gene_id "15:76721000"; transcript_id "acd25180-a470-4407-85bd-99fe3f234962_FWD_pA_Ad3p";
chr15	76879309	76901889	chr15	75300000	89399999	Y	gene_id "ENSMUSG00000116024.1"; transcript_id "46d7f8f3-ba37-4279-a389-d7588c32cd51_FWD_pA_Ad3p";
chr15	76879309	76901305	chr15	75300000	89399999	Y	gene_id "15:76879000"; transcript_id "6119a174-4215-48bd-be8a-6178abf436ba_REV_pT_Ad5p_TSO3p";
chr15	76879309	76901632	chr15	75300000	89399999	Y	gene_id "ENSMUSG00000116024.1"; transcript_id "e2643fc7-68f4-4875-8a44-da9cd905a167_REV_pT_Ad5p_TSO3p";
chr15	76879320	76901305	chr15	75300000	89399999	Y	gene_id "ENSMUSG00000116024.1"; transcript_id "3ff7b900-16ad-478e-8dc9-1e6bf6291666_REV_pT_Ad5p_TSO3p";
chr15	78159463	78204237	chr15	75300000	89399999	Y	gene_id "ENSMUSG00000016637.7"; transcript_id "e74a0cce-8288-4a15-b5c5-d03308c934f5_REV_pT_Ad5p_TSO3p";
chr15	79045599	79062893	chr15	75300000	89399999	Y	gene_id "ENSMUSG00000033055.12"; transcript_id "5f00d651-b2c5-4ac4-8d12-6642068de021_FWD_pA_Ad3p";
chr15	79045599	79062893	chr15	75300000	89399999	Y	gene_id "ENSMUSG00000033055.12"; transcript_id "621f8c3b-013d-4d96-8f03-6973e18789ec_FWD_pA_Ad3p_TSO5p";
chr15	79045599	79062893	chr15	75300000	89399999	Y	gene_id "ENSMUSG00000033055.12"; transcript_id "a2e2c358-752b-4e89-aa53-b6588f62aa49_FWD_pA_Ad3p";
chr15	80091344	80161707	chr15	75300000	89399999	Y	gene_id "ENSMUSG00000022414.8"; transcript_id "0ed69fdc-dfee-4e47-b62d-3f9e4b1daca8_REV_pT_Ad5p_TSO3p";
chr15	84167837	84214303	chr15	75300000	89399999	Y	gene_id "ENSMUSG00000022437.7"; transcript_id "2584642d-d6c5-4f8a-bbf4-88a3bd8de710_REV_pT_Ad5p_TSO3p";
chr15	84167837	84214303	chr15	75300000	89399999	Y	gene_id "ENSMUSG00000022437.7"; transcript_id "2b1069d2-7e1c-4521-9ca1-88d348a66d72_REV_pT_Ad5p_TSO3p";
chr15	84167837	84214303	chr15	75300000	89399999	Y	gene_id "ENSMUSG00000022437.7"; transcript_id "670fde1a-8018-4ae9-b086-8e74749ecc93_FWD_pA_Ad3p";
chr15	84174269	84214303	chr15	75300000	89399999	Y	gene_id "ENSMUSG00000041653.5"; transcript_id "a8959407-2d1d-471a-aff0-e2b010358c82_FWD_pA_Ad3p_TSO3p";
chr15	93284278	93398334	chr15	93000000	93699999	Y	gene_id "ENSMUSG00000022634.9"; transcript_id "e01d447d-3cea-4448-bfba-c0d0afbb8a80_REV_pT_Ad5p_TSO3p";
chr15	98724366	98742773	chr15	98300000	101099999	Y	gene_id "ENSMUSG00000003355.7"; transcript_id "51090af0-f424-4917-879a-7bc0826da67e_FWD_pA_Ad3p";
chr15	98877778	98894540	chr15	98300000	101099999	Y	gene_id "ENSMUSG00000023755.10"; transcript_id "bb9edafe-a937-422a-8085-d943bb614ed4_REV_pT_Ad5p_TSO3p";
chr15	98877778	98908595	chr15	98300000	101099999	Y	gene_id "ENSMUSG00000023755.10"; transcript_id "df3ab3b4-ed21-4f19-b63f-8c752717305f_REV_pT_Ad5p_TSO3p";
chr15	98932363	98953551	chr15	98300000	101099999	Y	gene_id "ENSMUSG00000023004.8"; transcript_id "d97da953-70ae-4460-98e7-31f0bf82b34e_REV_pT_Ad5p_TSO3p";
chr15	101284272	101296316	chr15	101100000	101899999	Y	gene_id "15:101284000"; transcript_id "559d2cdc-e566-4a03-89c0-d0724f3c6f94_FWD_pA_Ad3p";
chr15	101284272	101296316	chr15	101100000	101899999	Y	gene_id "ENSMUSG00000037204.7"; transcript_id "c01b26a8-a631-4100-81c6-04377daab579_FWD_pA_Ad3p_TSO5p";
chr15	102459202	102498881	chr15	101900000	102499999	Y	gene_id "ENSMUSG00000056851.14"; transcript_id "b398a6c4-3b58-4b66-bcad-f16cf7d7d27f_REV_pT_Ad5p_TSO3p";
chr15	102459202	102498881	chr15	101900000	102499999	Y	gene_id "ENSMUSG00000056851.14"; transcript_id "cb14aed1-1e4a-40dc-b233-e79c411c0bfc_REV_pT_Ad5p_TSO3p";
chr15	102459202	102498881	chr15	101900000	102499999	Y	gene_id "ENSMUSG00000056851.14"; transcript_id "db98862b-708f-4062-bca4-36f89d669b76_FWD_pA_Ad3p";
chr15	103308235	103334327	chr15	103300000	103499999	Y	gene_id "ENSMUSG00000000552.10"; transcript_id "1560ab11-e738-4d14-a35b-e0fb25831030_REV_pT_Ad5p_TSO3p";
chr15	103308235	103340093	chr15	103300000	103499999	Y	gene_id "ENSMUSG00000000552.10"; transcript_id "5515f600-913b-4af0-b97e-6a0f4f6f3503_REV_pT_Ad5p_TSO3p";
chr15	103308235	103340093	chr15	103300000	103499999	Y	gene_id "ENSMUSG00000000552.10"; transcript_id "f393c536-2d9e-4651-8f47-04e67d6b56a5_REV_pT_Ad5p_TSO3p";
chr16	4616464	4627698	chr16	3900000	5299999	Y	gene_id "ENSMUSG00000014301.13"; transcript_id "874b8be5-474d-4573-b404-3fa477d2547b_REV_pT_Ad5p_TSO3p";
chr16	8513481	8858201	chr16	8400000	8899999	Y	gene_id "ENSMUSG00000057880.12"; transcript_id "73fbf037-4c2c-495f-8d6e-2e789fce269a_FWD_pA_Ad3p";
chr16	11140715	11235504	chr16	10300000	11999999	Y	gene_id "ENSMUSG00000062203.15"; transcript_id "063920d7-e660-4eb9-abe9-ce483f96d44b_FWD_pA_Ad3p";
chr16	17233572	17278661	chr16	16900000	18899999	Y	gene_id "ENSMUSG00000055692.21"; transcript_id "20ee9667-f0f2-4ed8-8e51-bcb4dbab98ee_REV_pT_Ad5p_TSO3p";
chr16	17233572	17283229	chr16	16900000	18899999	Y	gene_id "ENSMUSG00000055692.21"; transcript_id "950f63a8-7214-4513-8381-b5b5826dbd6e_FWD_pA_Ad3p";
chr16	17233572	17283229	chr16	16900000	18899999	Y	gene_id "ENSMUSG00000055692.21"; transcript_id "b3fcf9e2-6444-4813-ad4e-9b698353f13d_FWD_pA_Ad3p";
chr16	17892575	17911348	chr16	16900000	18899999	Y	gene_id "ENSMUSG00000003527.9"; transcript_id "37a5b2b0-8a5a-4755-bc43-12047367fa84_REV_pT_Ad5p_TSO3p";
chr16	18621811	18629939	chr16	16900000	18899999	Y	gene_id "ENSMUSG00000072214.7"; transcript_id "a64df547-1ab6-4598-bd8e-fbd231b10c8a_REV_pT_Ad5p_TSO3p";
chr16	29349838	29407638	chr16	29400000	29599999	N	gene_id "ENSMUSG00000038094.15"; transcript_id "8c8262d7-07cc-46b9-8eee-12f6595180e4_REV_pT_Ad5p_TSO3p";
chr16	31933943	31958185	chr16	30300000	36099999	Y	gene_id "ENSMUSG00000022774.13"; transcript_id "25a1315c-6866-47fd-9d7b-c3603b098fee_REV_pT_Ad5p_TSO3p";
chr16	31933943	31958185	chr16	30300000	36099999	Y	gene_id "ENSMUSG00000022774.13"; transcript_id "a5c10d6a-27b1-4878-8f17-4ee65102b500_FWD_pA_Ad3p_TSO3p";
chr16	31933943	31958185	chr16	30300000	36099999	Y	gene_id "ENSMUSG00000022774.13"; transcript_id "d31ca455-8fc8-4ec4-8dcb-4a31643667e4_REV_pT_Ad5p_TSO3p";
chr16	31933943	31942623	chr16	30300000	36099999	Y	gene_id "ENSMUSG00000045625.5"; transcript_id "fa0c1842-865c-4e21-9212-41a5ff4456f8_REV_pT_Ad5p";
chr16	31990416	32079342	chr16	30300000	36099999	Y	gene_id "ENSMUSG00000022781.8"; transcript_id "ecaf9b0c-82ca-4c04-bbd1-4892b032e470_FWD_pA_Ad3p_TSO5p";
chr16	36875140	36912393	chr16	36800000	38799999	Y	gene_id "ENSMUSG00000034243.17"; transcript_id "df8d11b1-47ac-46aa-9c26-f0dba298fd0c_REV_pT_Ad5p_TSO3p";
chr16	38346991	38378216	chr16	36800000	38799999	Y	gene_id "ENSMUSG00000022803.12"; transcript_id "ef9a2e27-2de4-414c-a9fd-e2f4b69cd224_REV_pT_Ad5p_TSO3p";
chr16	38346996	38378216	chr16	36800000	38799999	Y	gene_id "ENSMUSG00000022803.12"; transcript_id "0e92e88c-8668-4fc5-bb9b-02c1363d401f_FWD_pA-1_Ad3p";
chr16	62734237	62847040	chr16	62600000	62899999	Y	gene_id "16:62734000"; transcript_id "e1fe444d-ba92-4e4d-a955-9fef5366bdfc_REV_pT_Ad5p_TSO3p";
chr16	62735161	62847040	chr16	62600000	62899999	Y	gene_id "ENSMUSG00000022911.11"; transcript_id "6c48cbec-54c8-484e-a14a-406bda3cc3f7_FWD_pA_Ad3p";
chr16	92478742	92500288	chr16	91500000	94099999	Y	gene_id "16:92478000"; transcript_id "1b60a931-d2f4-4a03-bf49-319f48a0512f_FWD_pA_Ad3p";
chr16	93607889	93630338	chr16	91500000	94099999	Y	gene_id "ENSMUSG00000082815.2"; transcript_id "47412433-0825-4b4b-8800-f5f79df9c56b_REV_pT_Ad5p_TSO3p";
chr16	96151810	96220591	chr16	95700000	96199999	N	gene_id "ENSMUSG00000040666.19"; transcript_id "265c70f4-2bd4-4937-972e-c4af58aa76bf_REV_pT_Ad5p";
chr17	3177201	3258289	chr17	3100000	3599999	Y	gene_id "ENSMUSG00000046201.9"; transcript_id "5744fbaa-352e-4e4f-8fda-4947fb391181_FWD_pA_Ad3p";
chr17	6079837	6137963	chr17	5900000	6099999	N	gene_id "ENSMUSG00000034345.14"; transcript_id "49a18a5d-bb27-4457-be8c-3e497e7632c0_FWD_pA-1_Ad3p";
chr17	6079837	6213608	chr17	5900000	6099999	N	gene_id "ENSMUSG00000034377.10"; transcript_id "520a4e5a-9f72-4213-929a-19bba692e4d4_REV_pT_Ad5p_TSO3p";
chr17	6430112	6607894	chr17	6400000	6599999	N	gene_id "ENSMUSG00000000579.14"; transcript_id "aeca00e2-4cdf-4503-a748-b369e0449a4b_FWD_pA_Ad3p";
chr17	7025277	7228316	chr17	6900000	7099999	N	gene_id "ENSMUSG00000094083.2"; transcript_id "34930d4f-6e5d-42bf-9b42-8bd54f3aaf06_FWD_pA_Ad3p";
chr17	8038510	8147788				N	gene_id "ENSMUSG00000116988.1"; transcript_id "4c9e96fb-4687-474e-b61b-d34a3941849d_FWD_pA_Ad3p";
chr17	12911349	12992192	chr17	12900000	13199999	Y	gene_id "ENSMUSG00000057388.9"; transcript_id "ca1c9170-42b0-448d-bb62-fc176bb219e0_FWD_pA_Ad3p";
chr17	12924258	12960747	chr17	12900000	13199999	Y	gene_id "ENSMUSG00000023832.14"; transcript_id "55d367ff-b720-49c6-ab1a-984a18b76a57_FWD_pA_Ad3p";
chr17	12929547	12960747	chr17	12900000	13199999	Y	gene_id "ENSMUSG00000023832.14"; transcript_id "5d4f79bb-adfe-4b5a-806e-4601ef885f87_REV_pT_Ad5p_TSO5p";
chr17	13489273	13761386	chr17	13600000	13799999	N	gene_id "ENSMUSG00000117042.1"; transcript_id "4266ed38-f971-452d-88a3-58c8ce9363b1_REV_pT_Ad5p-1_TSO3p";
chr17	13489273	13761386	chr17	13600000	13799999	N	gene_id "ENSMUSG00000117042.1"; transcript_id "c67bc812-ea63-4ed6-b807-c06570b8875c_REV_pT_Ad5p_TSO3p";
chr17	13539535	13761386	chr17	13600000	13799999	N	gene_id "ENSMUSG00000117063.1"; transcript_id "8c04ce8c-78da-42ab-a6b6-3e9b95071db4_FWD_pA_Ad3p";
chr17	13539555	13761386	chr17	13600000	13799999	N	gene_id "ENSMUSG00000117042.1"; transcript_id "7de423ff-0a4b-4026-b6bb-8d1dc0cb9be2_FWD_pA-1_Ad3p";
chr17	13539555	13761386	chr17	13600000	13799999	N	gene_id "ENSMUSG00000117042.1"; transcript_id "b7ca7409-5072-4e23-8d89-92bce83e9b40_FWD_pA_Ad3p";
chr17	13539555	13761386	chr17	13600000	13799999	N	gene_id "ENSMUSG00000117042.1"; transcript_id "e17090cc-0b43-4f39-94c2-c71051316a12_REV_pT_Ad5p_TSO3p";
chr17	13539859	13761601	chr17	13600000	13799999	N	gene_id "ENSMUSG00000117042.1"; transcript_id "8106bfd9-50fe-4a41-ad66-84ebaaac8de5_FWD_pA_Ad3p_TSO3p";
chr17	15018963	15054252				N	gene_id "ENSMUSG00000116895.1"; transcript_id "78b35c7b-c2fc-4445-9537-2883f0855b67_REV_pT_Ad5p_TSO3p";
chr17	15041615	15158619				N	gene_id "ENSMUSG00000036552.19"; transcript_id "3dc05a3c-7c3d-4786-9f24-ef4dd0d5d768_FWD_pA_Ad3p";
chr17	15041615	15158619				N	gene_id "ENSMUSG00000036552.19"; transcript_id "6daaf94a-2147-4fd1-af7b-4a4fbaf00a72_FWD_pA_Ad3p";
chr17	15041615	15158619				N	gene_id "ENSMUSG00000036552.19"; transcript_id "f13e07f8-7b0d-49cf-b78b-c4c66472e0bd_FWD_pA_Ad3p";
chr17	16951539	17089932	chr17	16800000	16999999	N	gene_id "ENSMUSG00000096696.1"; transcript_id "727a8112-e16e-4ece-a58d-06d9d51419ed_FWD_pA_Ad3p";
chr17	17064113	17144856	chr17	17100000	17299999	N	gene_id "ENSMUSG00000095990.1"; transcript_id "0fb6e45b-533c-4796-a057-528888413a7c_FWD_pA_Ad3p";
chr17	17064113	17264528	chr17	17100000	17299999	N	gene_id "ENSMUSG00000116802.1"; transcript_id "887e8ae1-c50b-4e05-9572-a5b4016f9894_FWD_pA_Ad3p";
chr17	17121415	17318104	chr17	17100000	17299999	N	gene_id "ENSMUSG00000095990.1"; transcript_id "58159f8f-bc47-4d62-8f51-35b52adb0f8d_REV_pT_Ad5p_TSO3p";
chr17	17121415	17318104	chr17	17100000	17299999	N	gene_id "ENSMUSG00000095990.1"; transcript_id "94235f19-5574-4ea7-8864-d4230562e920_REV_pT_Ad5p_TSO3p";
chr17	17121415	17264870	chr17	17100000	17299999	Y	gene_id "ENSMUSG00000116802.1"; transcript_id "7a849428-8d10-4f07-a7b3-2c23a9816191_FWD_pA_Ad3p";
chr17	17294443	17393968	chr17	17100000	17299999	N	gene_id "ENSMUSG00000116564.1"; transcript_id "ab16bb39-b18b-48d2-bd0c-4d470e9fea53_REV_pT_Ad5p_TSO3p";
chr17	17374572	17457295	chr17	17300000	17799999	Y	gene_id "ENSMUSG00000116564.1"; transcript_id "eac5a085-3986-46ee-8e12-f125076415a4_REV_pT_Ad5p_TSO3p";
chr17	17387445	17444364	chr17	17300000	17799999	Y	gene_id "ENSMUSG00000047786.12"; transcript_id "53ff090e-3287-4a9c-a86e-abd59bbec4e2_REV_pT_Ad5p_TSO3p";
chr17	21488998	21532068	chr17	21300000	21499999	N	gene_id "ENSMUSG00000057409.7"; transcript_id "237a383d-8d45-4baa-b568-b7e40594b1ba_FWD_pA_Ad3p";
chr17	21488998	21528518	chr17	21300000	21499999	N	gene_id "ENSMUSG00000057409.7"; transcript_id "2d42c161-39a0-4d6d-b614-9fde6215ab7b_FWD_pA_Ad3p";
chr17	21488998	21528518	chr17	21300000	21499999	N	gene_id "ENSMUSG00000057409.7"; transcript_id "7986e809-7548-406e-86f8-f6cc0c585b3d_FWD_pA_Ad3p";
chr17	21488998	21531827	chr17	21300000	21499999	N	gene_id "ENSMUSG00000057409.7"; transcript_id "c1d9540d-32af-4141-bb1a-c0c2c21445f2_FWD_pA_Ad3p";
chr17	21488998	21531827	chr17	21300000	21499999	N	gene_id "ENSMUSG00000117037.1"; transcript_id "dff8ffa2-c7e5-4b43-a20e-c1a54028d25d_FWD_pA_Ad3p";
chr17	21488998	21562214	chr17	21300000	21499999	N	gene_id "ENSMUSG00000057409.7"; transcript_id "475527a3-2163-483f-abc3-d1c273aab7a6_REV_pT_Ad5p_TSO3p";
chr17	21488998	21562214	chr17	21300000	21499999	N	gene_id "ENSMUSG00000051341.6"; transcript_id "79b089f7-72c2-4f39-b4de-b6a2c84b1033_REV_pT_Ad5p_TSO3p";
chr17	21488998	21562214	chr17	21300000	21499999	N	gene_id "ENSMUSG00000051341.6"; transcript_id "e506452c-36a5-4f49-b645-75ccef36ab89_REV_pT_Ad5p_TSO3p";
chr17	21881837	21962340				N	gene_id "ENSMUSG00000078546.8"; transcript_id "25e2699d-6160-4670-8741-4d3f990dac9f_REV_pT_Ad5p";
chr17	24163866	24205523	chr17	23700000	36199999	Y	gene_id "ENSMUSG00000024121.13"; transcript_id "16f8db9d-09e6-4198-8ab5-f88d7052380e_REV_pT_Ad5p_TSO3p";
chr17	24163866	24205523	chr17	23700000	36199999	Y	gene_id "ENSMUSG00000036473.16"; transcript_id "a65fad12-69fa-423a-b485-b085c127537b_FWD_pA_Ad3p";
chr17	24163866	24205523	chr17	23700000	36199999	Y	gene_id "ENSMUSG00000024121.13"; transcript_id "b0e32869-bace-4ea8-a91a-4c5c29d19717_REV_pT_Ad5p_TSO3p";
chr17	24163866	24205523	chr17	23700000	36199999	Y	gene_id "ENSMUSG00000024121.13"; transcript_id "2629e365-9b55-4012-bb01-13da8d195266_FWD_pA_Ad3p";
chr17	24163866	24205523	chr17	23700000	36199999	Y	gene_id "ENSMUSG00000024121.13"; transcript_id "342747ac-6da7-48e1-956f-e828e45e842a_REV_pT_Ad5p_TSO3p";
chr17	24163866	24205523	chr17	23700000	36199999	Y	gene_id "ENSMUSG00000024121.13"; transcript_id "46a7721f-3fa5-419a-86aa-a41600aec95b_REV_pT_Ad5p_TSO3p";
chr17	25698691	25719087	chr17	23700000	36199999	Y	gene_id "ENSMUSG00000025739.13"; transcript_id "f2eda531-a2fd-4449-9a08-be3fa1c6dbad_REV_pT_Ad5p";
chr17	25790501	25795659	chr17	23700000	36199999	Y	gene_id "ENSMUSG00000057411.9"; transcript_id "2a55acca-40cf-4b0e-a9aa-0c39242d96d3_REV_pT_Ad5p_TSO3p";
chr17	25790506	25796491	chr17	23700000	36199999	Y	gene_id "ENSMUSG00000118135.1"; transcript_id "30202397-0282-40af-aec0-1c81202c7151_FWD_pA_Ad3p";
chr17	33333687	33394641	chr17	23700000	36199999	Y	gene_id "ENSMUSG00000003929.11"; transcript_id "8469e3ee-3270-4db8-bf2f-1c1db6647ddd_REV_pT_Ad5p_TSO3p";
chr17	33335103	33394641	chr17	23700000	36199999	Y	gene_id "ENSMUSG00000055240.17"; transcript_id "1a315d50-3d78-4cc9-b163-845f320e503b_FWD_pA_Ad3p";
chr17	33629090	33645706	chr17	23700000	36199999	Y	gene_id "ENSMUSG00000073423.10"; transcript_id "32d3a925-97fa-49e4-9adf-fb94cc05a38e_FWD_pA_Ad3p";
chr17	33677391	33718657	chr17	23700000	36199999	Y	gene_id "ENSMUSG00000079557.11"; transcript_id "1b4b2df4-3aba-4e9b-8cba-f8579d4afb5a_REV_pT_Ad5p_TSO3p";
chr17	33677391	33718657	chr17	23700000	36199999	Y	gene_id "ENSMUSG00000079557.11"; transcript_id "fbd5a856-533b-41e4-8f13-c544b6b01303_FWD_pA_Ad3p";
chr17	33843091	33906675	chr17	23700000	36199999	Y	gene_id "ENSMUSG00000092349.1"; transcript_id "8fec45c9-6eef-4589-886c-af7ff63c103e_REV_pT_Ad5p_TSO3p";
chr17	33905622	33915582	chr17	23700000	36199999	Y	gene_id "ENSMUSG00000002307.16"; transcript_id "9f95e6b7-89eb-4fbf-878d-8edd17031842_FWD_pA_Ad3p";
chr17	34120568	34139975	chr17	23700000	36199999	Y	gene_id "ENSMUSG00000037649.10"; transcript_id "92fa4bd6-4090-4bde-9639-571d4735cfef_REV_pT_Ad5p";
chr17	34264832	34315103	chr17	23700000	36199999	Y	gene_id "ENSMUSG00000073421.6"; transcript_id "7fc88440-ef96-41b5-9a67-6bc1f2d17fa4_REV_pT_Ad5p_TSO3p";
chr17	34264832	34334491	chr17	23700000	36199999	Y	gene_id "17:34264000"; transcript_id "d04af895-f660-4d7e-a10c-040990f670b8_REV_pT_Ad5p_TSO3p";
chr17	34309575	34334491	chr17	23700000	36199999	Y	gene_id "17:34309000"; transcript_id "0686eaae-cba8-41b7-abef-a5807f650329_REV_pT_Ad5p_TSO3p";
chr17	34629533	34646324	chr17	23700000	36199999	Y	gene_id "17:34629000"; transcript_id "07b2992f-dabe-420b-af56-9a1c5a2c11d5_FWD_pA_Ad3p";
chr17	35170991	35186985	chr17	23700000	36199999	Y	gene_id "ENSMUSG00000024397.14"; transcript_id "7239b05b-42bd-4b80-8019-769ac6f5114c_FWD_pA_Ad3p";
chr17	35263096	35397342	chr17	23700000	36199999	Y	gene_id "ENSMUSG00000073411.12"; transcript_id "21901b54-75f8-4626-8d9e-324defbb21b8_REV_pT_Ad5p_TSO3p";
chr17	35263096	35397588	chr17	23700000	36199999	Y	gene_id "ENSMUSG00000055413.12"; transcript_id "69d5cdae-68a2-481c-ab31-cad37344c02e_REV_pT_Ad5p_TSO3p";
chr17	35263096	35345255	chr17	23700000	36199999	Y	gene_id "ENSMUSG00000073411.12"; transcript_id "2a9fcfd9-3e68-4d26-b06a-580ee15b43f4_REV_pT_Ad5p";
chr17	35263096	35397342	chr17	23700000	36199999	Y	gene_id "ENSMUSG00000073411.12"; transcript_id "88aacbf1-bf1f-4f8f-b7e9-4b72e5f81ef8_REV_pT_Ad5p_TSO3p";
chr17	35263096	35442542	chr17	23700000	36199999	Y	gene_id "ENSMUSG00000073411.12"; transcript_id "e32aa948-6926-45ca-9cd6-7954d7a2ca03_FWD_pA_Ad3p";
chr17	35263384	35397342	chr17	23700000	36199999	Y	gene_id "ENSMUSG00000055413.12"; transcript_id "d3fa66bb-45d9-43fd-988c-66c4c121c551_FWD_pA_Ad3p";
chr17	35263384	35428139	chr17	23700000	36199999	Y	gene_id "ENSMUSG00000073409.12"; transcript_id "48e403e9-797b-4821-86fa-9162900cc067_FWD_pA_Ad3p";
chr17	35263384	35473360	chr17	23700000	36199999	Y	gene_id "17:35263000"; transcript_id "fb5c83fa-614a-4173-80a0-0a19090aa5fc_FWD_pA_Ad3p";
chr17	35320820	35397342	chr17	23700000	36199999	Y	gene_id "17:35320000"; transcript_id "edbe4735-f9d0-4f4f-bd5e-9a51093cfb73_REV_pT_Ad5p_TSO3p";
chr17	35342597	35383367	chr17	23700000	36199999	Y	gene_id "ENSMUSG00000035929.11"; transcript_id "705bd10c-3dcf-4a1f-aa0a-310150c6ad2b_REV_pT_Ad5p_TSO3p";
chr17	35342599	35473360	chr17	23700000	36199999	Y	gene_id "17:35342000"; transcript_id "0ee48bc3-12e1-4581-9448-15cd66ae4706_FWD_pA_Ad3p";
chr17	35342599	35473360	chr17	23700000	36199999	Y	gene_id "17:35342000"; transcript_id "f0c15c4f-e403-4218-8af0-db6ce0fc8da7_REV_pT_Ad5p_TSO3p";
chr17	35342599	35397588	chr17	23700000	36199999	Y	gene_id "ENSMUSG00000055413.12"; transcript_id "13937116-73e1-442c-afdd-938d02937c3c_REV_pT_Ad5p_TSO3p";
chr17	35342599	35397342	chr17	23700000	36199999	Y	gene_id "ENSMUSG00000091705.8"; transcript_id "504db5f6-94c8-4fcd-ae54-44ab81fc9ad4_FWD_pA_Ad3p";
chr17	35342599	35428139	chr17	23700000	36199999	Y	gene_id "ENSMUSG00000073409.12"; transcript_id "1a05add4-348b-468e-9516-56920a4a88a6_REV_pT_Ad5p_TSO3p";
chr17	35342599	35442542	chr17	23700000	36199999	Y	gene_id "ENSMUSG00000060550.16"; transcript_id "b36b38ef-3adf-46bf-abb6-a4630f803aa7_FWD_pA_Ad3p";
chr17	35342599	35428139	chr17	23700000	36199999	Y	gene_id "17:35342000"; transcript_id "bdd83458-8297-45c3-a04b-65058b927442_REV_pT_Ad5p_TSO3p";
chr17	35394126	35473360	chr17	23700000	36199999	Y	gene_id "ENSMUSG00000055413.12"; transcript_id "384100df-40e0-4dc2-b00b-2a8013a9eecd_REV_pT_Ad5p_TSO3p";
chr17	35394126	35473360	chr17	23700000	36199999	Y	gene_id "ENSMUSG00000055413.12"; transcript_id "9611c770-5c5f-48f6-9aa0-ec404f4bbc48_FWD_pA_Ad3p";
chr17	35394126	35428139	chr17	23700000	36199999	Y	gene_id "ENSMUSG00000073409.12"; transcript_id "a9d3df67-e62d-46e2-840c-518b4485b637_FWD_pA_Ad3p";
chr17	35394126	35428139	chr17	23700000	36199999	Y	gene_id "ENSMUSG00000055413.12"; transcript_id "e6b18801-f1fb-4110-be2f-ebfaab306935_REV_pT_Ad5p_TSO3p";
chr17	35394126	35442542	chr17	23700000	36199999	Y	gene_id "ENSMUSG00000055413.12"; transcript_id "d38d5849-fe3a-416a-8da1-82db489080f7_REV_pT_Ad5p_TSO3p";
chr17	35424850	35443769	chr17	23700000	36199999	Y	gene_id "ENSMUSG00000060550.16"; transcript_id "e9f67f22-c609-440c-9a73-cb046c957077_REV_pT_Ad5p_TSO3p";
chr17	35439469	35473360	chr17	23700000	36199999	Y	gene_id "ENSMUSG00000060550.16"; transcript_id "29a0acf5-f30f-4385-b75f-5c607fbe1838_FWD_pA_Ad3p";
chr17	36014830	36168198	chr17	23700000	36199999	Y	gene_id "ENSMUSG00000073402.11"; transcript_id "5b619f70-21f0-4e8a-b141-fc2be9498f8d_REV_pT_Ad5p_TSO3p";
chr17	36014830	36168198	chr17	23700000	36199999	Y	gene_id "17:36014000"; transcript_id "85bdf4eb-9773-4462-9f79-1b25f49cb63c_FWD_pA_Ad3p_TSO5p";
chr17	36030587	36111410	chr17	23700000	36199999	Y	gene_id "ENSMUSG00000067212.8"; transcript_id "4279fb93-6c93-4b32-bd17-3baa89aac41e_REV_pT_Ad5p_TSO3p";
chr17	36977701	36987961	chr17	36900000	37299999	Y	gene_id "ENSMUSG00000064308.10"; transcript_id "68f41f70-aa26-4192-a23c-e5eecdd88e8f_REV_pT_Ad5p-1_TSO3p";
chr17	46667243	46680904	chr17	45600000	49599999	Y	gene_id "ENSMUSG00000063576.12"; transcript_id "37930ecb-7e90-464b-9f0c-9de2b82874c2_REV_pT_Ad5p-1_TSO5p3p";
chr17	46725664	46752197	chr17	45600000	49599999	Y	gene_id "ENSMUSG00000002769.9"; transcript_id "a1807a4f-d9bd-435f-b750-5075a9814e9a_FWD_pA_Ad3p";
chr17	47686740	47689312	chr17	45600000	49599999	Y	gene_id "ENSMUSG00000033475.15"; transcript_id "145cc51e-7629-402b-84b1-d4326547681e_REV_pT_Ad5p_TSO3p";
chr17	55866592	55945259				N	gene_id "ENSMUSG00000057835.7"; transcript_id "2fe753a5-eed2-4a3e-b8f2-d53c79ac9066_FWD_pA_Ad3p";
chr17	57034041	57059863	chr17	56100000	57499999	Y	gene_id "ENSMUSG00000046329.14"; transcript_id "d7e2e5f8-5a5d-48de-a39b-61fdb4b4d159_FWD_pA_Ad3p_TSO5p";
chr17	65580053	65772640	chr17	65500000	65699999	N	gene_id "ENSMUSG00000024091.9"; transcript_id "0bc16881-66de-4d96-b906-73510631a282_FWD_pA_Ad3p";
chr17	65937308	66077044	chr17	65900000	66099999	Y	gene_id "ENSMUSG00000034647.15"; transcript_id "dac95134-ca90-4b7a-86f5-86a1fffd5efa_FWD_pA_Ad3p";
chr17	70974026	70996823	chr17	70900000	71099999	Y	gene_id "ENSMUSG00000034868.9"; transcript_id "40533caa-aa09-4a2e-86b8-df32f4b86489_REV_pT_Ad5p_TSO5p";
chr17	70974026	71002165	chr17	70900000	71099999	Y	gene_id "17:70974000"; transcript_id "422d3737-d314-456a-b981-bc6a861d0197_FWD_pA_Ad3p_TSO5p";
chr17	80290212	80350104	chr17	80300000	80599999	N	gene_id "ENSMUSG00000054901.7"; transcript_id "e762ed25-727d-4777-a00c-bf0275d8e620_FWD_pA_Ad3p";
chr17	85611918	85621001	chr17	84200000	88099999	Y	gene_id "ENSMUSG00000093460.9"; transcript_id "82d9ad16-0248-4cb8-9827-e85e960f744a_FWD_pA_Ad3p";
chr17	85612738	85621001	chr17	84200000	88099999	Y	gene_id "ENSMUSG00000093460.9"; transcript_id "4d0f4f38-6e2f-453d-b088-4040fdb5173c_FWD_pA_Ad3p";
chr17	85612738	85621001	chr17	84200000	88099999	Y	gene_id "17:85612000"; transcript_id "789a2611-cb30-44e8-9868-f71b91d8a69a_REV_pT_Ad5p_TSO3p";
chr17	85613382	85624116	chr17	84200000	88099999	Y	gene_id "17:85613000"; transcript_id "cf11dc0c-ebab-4c91-9189-41c6476616ef_REV_pT_Ad5p-1_TSO3p";
chr17	86963545	87035810	chr17	84200000	88099999	Y	gene_id "ENSMUSG00000024146.9"; transcript_id "56fb6ec6-0b22-415c-a62a-b59ff0341d7e_REV_pT_Ad5p_TSO3p";
chr18	12219222	12305702	chr18	11900000	13199999	Y	gene_id "ENSMUSG00000057766.14"; transcript_id "132cca0f-e43e-4159-a27f-c9511f4168f8_FWD_pA_Ad3p";
chr18	35562219	35617183	chr18	34500000	36999999	Y	gene_id "ENSMUSG00000037058.16"; transcript_id "673aacc9-725d-42e0-8e58-d1e37588c65b_REV_pT_Ad5p_TSO3p";
chr18	35562219	35617183	chr18	34500000	36999999	Y	gene_id "ENSMUSG00000037058.16"; transcript_id "eb5a672e-1be0-44fa-8b25-0b672cb65054_REV_pT_Ad5p-1_TSO3p";
chr18	35771558	35860917	chr18	34500000	36999999	Y	gene_id "ENSMUSG00000091896.8"; transcript_id "f5447584-93a1-4ede-9800-154b8b36fa0c_REV_pT_Ad5p-1_TSO3p";
chr18	36667246	36675475	chr18	34500000	36999999	Y	gene_id "ENSMUSG00000006050.12"; transcript_id "70b7d442-8329-49f2-8caf-f17cadfa80a7_REV_pT_Ad5p_TSO3p";
chr18	36667246	36679366	chr18	34500000	36999999	Y	gene_id "ENSMUSG00000117679.1"; transcript_id "e47a6868-d7cc-4d01-82e1-1f794cb3c793_FWD_pA_Ad3p";
chr18	41747234	41951242	chr18	41600000	41799999	N	gene_id "18:41747000"; transcript_id "a5bb9393-3d57-4ec6-b3a6-cd4b1a5fde39_REV_pT_Ad5p_TSO3p";
chr18	41873489	41951242	chr18	41800000	41999999	Y	gene_id "ENSMUSG00000056671.7"; transcript_id "332e8316-b522-4a03-901c-401d967829c7_FWD_pA_Ad3p";
chr18	41873712	41951242	chr18	41800000	41999999	Y	gene_id "ENSMUSG00000056671.7"; transcript_id "0ea07a5b-be62-4bd5-9c42-fbbdc1bc779f_FWD_pA_Ad3p_TSO5p";
chr18	46713204	46741557	chr18	46300000	47099999	Y	gene_id "ENSMUSG00000033022.8"; transcript_id "99a4498c-706c-4632-9c3c-c1181472bf60_REV_pT_Ad5p_TSO3p";
chr18	46713204	46741557	chr18	46300000	47099999	Y	gene_id "ENSMUSG00000033022.8"; transcript_id "e7cf867b-c2a5-4cc4-b810-0f6074e53d08_FWD_pA_Ad3p";
chr18	46713419	46741557	chr18	46300000	47099999	Y	gene_id "ENSMUSG00000032905.5"; transcript_id "01d69d74-d7b1-44a8-b207-1ac2e20cb487_FWD_pA_Ad3p";
chr18	54802514	54987930	chr18	54400000	56199999	Y	gene_id "18:54802000"; transcript_id "65536254-11b5-4c27-9d78-5fa13bad16e7_FWD_pA_Ad3p_TSO5p";
chr18	57468516	57731065	chr18	56500000	58299999	Y	gene_id "ENSMUSG00000069372.3"; transcript_id "3accdb18-921b-4bfd-97f3-c6422f073eff_REV_pT_Ad5p_TSO3p";
chr18	57468516	57731065	chr18	56500000	58299999	Y	gene_id "ENSMUSG00000058925.11"; transcript_id "589e9330-8819-4eb2-9014-365d0dc55093_REV_pT_Ad5p_TSO3p";
chr18	57468516	57731065	chr18	56500000	58299999	Y	gene_id "ENSMUSG00000058925.11"; transcript_id "e270b3a2-cb51-4259-8bfe-f48893b643c6_REV_pT_Ad5p_TSO3p";
chr18	61696837	61726323	chr18	60600000	62099999	Y	gene_id "ENSMUSG00000024579.7"; transcript_id "e90f0278-f9d0-45be-89fb-da0161673c54_FWD_pA_Ad3p";
chr18	62592194	62741387				N	gene_id "ENSMUSG00000060201.5"; transcript_id "14c092fc-c571-4eae-adf5-5145ec45df7e_REV_pT_Ad5p-1_TSO3p";
chr18	62592194	62615251				N	gene_id "ENSMUSG00000060201.5"; transcript_id "2ae55bb8-a265-4478-b4ff-04cb7cc67627_REV_pT_Ad5p_TSO3p";
chr18	74268175	74300194	chr18	74100000	74299999	N	gene_id "ENSMUSG00000024561.11"; transcript_id "a48eaced-8652-4c6e-96b2-8c6dafe7b34d_REV_pT_Ad5p_TSO3p";
chr18	74268175	74300194	chr18	74100000	74299999	N	gene_id "ENSMUSG00000024561.11"; transcript_id "e6d6a261-8160-40b2-8b8f-c5fc7b948343_FWD_pA_Ad3p";
chr18	74268290	74300194	chr18	74100000	74299999	N	gene_id "ENSMUSG00000024561.11"; transcript_id "5548ac0d-e061-4385-9aab-c3a895df90f6_REV_pT_Ad5p_TSO3p";
chr18	74268290	74300194	chr18	74100000	74299999	N	gene_id "ENSMUSG00000024561.11"; transcript_id "add99b3b-6196-4f3f-a636-c18a2123b971_FWD_pA_Ad3p";
chr18	75001189	75009593	chr18	74500000	76499999	Y	gene_id "ENSMUSG00000062328.8"; transcript_id "ec3801a5-822f-46dd-8ab7-89304ace6a70_REV_pT_Ad5p_TSO3p";
chr18	80192265	80236833	chr18	80200000	85199999	N	gene_id "ENSMUSG00000024570.7"; transcript_id "5e813bcd-d6d8-4e49-b522-6d38b081c7c1_REV_pT_Ad5p_TSO3p";
chr18	90510154	90592528	chr18	90400000	90599999	Y	gene_id "ENSMUSG00000024614.7"; transcript_id "6ce9be46-de89-4955-98dc-1376bf274eff_FWD_pA_Ad3p";
chr19	4035407	4041719	chr19	3600000	6399999	Y	gene_id "ENSMUSG00000060803.6"; transcript_id "05747a22-8886-4d69-9ea5-224223b581f9_REV_pT_Ad5p_TSO3p";
chr19	4035407	4041719	chr19	3600000	6399999	Y	gene_id "ENSMUSG00000060803.6"; transcript_id "73817321-802c-4f0f-842c-8cc49fcb6985_REV_pT_Ad5p_TSO3p";
chr19	4035407	4041938	chr19	3600000	6399999	Y	gene_id "ENSMUSG00000060803.6"; transcript_id "8c690cb3-3675-4493-b464-dce184c8f975_REV_pT_Ad5p_TSO3p";
chr19	4035407	4159265	chr19	3600000	6399999	Y	gene_id "ENSMUSG00000058216.13"; transcript_id "542f7b92-a66d-4100-9f60-8bfe1a248add_REV_pT_Ad5p";
chr19	4139787	4154033	chr19	3600000	6399999	Y	gene_id "ENSMUSG00000024835.15"; transcript_id "1e388935-87c7-4fc6-8153-7e9be47aa86d_FWD_pA_Ad3p";
chr19	4139787	4154033	chr19	3600000	6399999	Y	gene_id "ENSMUSG00000024835.15"; transcript_id "848d417e-5391-4cd1-8690-7a2d71ab0699_REV_pT_Ad5p_TSO3p";
chr19	4139787	4154033	chr19	3600000	6399999	Y	gene_id "ENSMUSG00000024835.15"; transcript_id "1562cd3c-bb5e-41ac-b318-4699fadd923f_REV_pT_Ad5p_TSO3p";
chr19	4139787	4154033	chr19	3600000	6399999	Y	gene_id "19:4139000"; transcript_id "28ba5130-3025-4e88-8b26-518fec7d0eda_FWD_pA_Ad3p";
chr19	4139787	4154033	chr19	3600000	6399999	Y	gene_id "19:4139000"; transcript_id "4ffc2822-b339-48a5-92ab-8ed87a27583d_REV_pT_Ad5p_TSO3p";
chr19	4139787	4154033	chr19	3600000	6399999	Y	gene_id "19:4139000"; transcript_id "a4214e60-9458-469f-8e43-ebc8e9fe02ad_FWD_pA_Ad3p";
chr19	4692178	4811603	chr19	3600000	6399999	Y	gene_id "ENSMUSG00000096370.8"; transcript_id "cec7e78e-969d-4909-9b40-5483ab130504_FWD_pA_Ad3p";
chr19	4785153	4811603	chr19	3600000	6399999	Y	gene_id "ENSMUSG00000094936.8"; transcript_id "0eba12c6-06ce-472d-962c-034f0a1ad03a_REV_pT_Ad5p_TSO3p";
chr19	4785153	4811603	chr19	3600000	6399999	Y	gene_id "ENSMUSG00000094936.8"; transcript_id "472cd831-bcb9-4b5a-a8d7-58aefb34bbff_FWD_pA_Ad3p";
chr19	4785153	4811603	chr19	3600000	6399999	Y	gene_id "ENSMUSG00000096370.8"; transcript_id "cd9f7135-a9d7-4b25-ad4e-d076f3c9b4ef_FWD_pA_Ad3p";
chr19	4785153	4811603	chr19	3600000	6399999	Y	gene_id "ENSMUSG00000094936.8"; transcript_id "d6bb3b9f-0b3f-47e6-9e3a-e29493d6d316_FWD_pA_Ad3p";
chr19	4907229	4943067	chr19	3600000	6399999	Y	gene_id "ENSMUSG00000063904.4"; transcript_id "14fda29a-f30c-4bb9-a2c4-7cec740a2f29_REV_pT_Ad5p_TSO3p";
chr19	5092868	5106976	chr19	3600000	6399999	Y	gene_id "ENSMUSG00000024873.7"; transcript_id "7b3c473a-9a6f-47c4-81ac-17b4af43814d_REV_pT_Ad5p_TSO3p";
chr19	5092868	5106976	chr19	3600000	6399999	Y	gene_id "ENSMUSG00000024873.7"; transcript_id "a5b49c7b-6870-4ef1-9af5-78bfbd204987_FWD_pA_Ad3p";
chr19	5766248	5802671	chr19	3600000	6399999	Y	gene_id "19:5766000"; transcript_id "9be191c0-0ad0-48db-8515-ae050015e3b9_REV_pT_Ad5p_TSO3p";
chr19	5770391	5802671	chr19	3600000	6399999	Y	gene_id "19:5770000"; transcript_id "315c4c60-bb42-48e8-b0bb-984f9f28739a_REV_pT_Ad5p_TSO3p";
chr19	6066129	6069071	chr19	3600000	6399999	Y	gene_id "ENSMUSG00000024799.16"; transcript_id "e0676e73-1095-4923-ab72-615c5b6fba31_REV_pT_Ad5p_TSO3p";
chr19	6066129	6070614	chr19	3600000	6399999	Y	gene_id "ENSMUSG00000024797.14"; transcript_id "edb46027-394e-471b-9141-da8ffb1f9c24_REV_pT_Ad5p_TSO3p";
chr19	7198846	7217543	chr19	6900000	7599999	Y	gene_id "ENSMUSG00000024767.11"; transcript_id "186ff299-2b81-4553-8c60-041fcf2827a8_FWD_pA_Ad3p";
chr19	8757073	8772475	chr19	8600000	9299999	Y	gene_id "ENSMUSG00000010097.15"; transcript_id "159ad7e9-e021-4a25-a9e7-f73ffb820acf_REV_pT_Ad5p_TSO3p";
chr19	8770996	8890746	chr19	8600000	9299999	Y	gene_id "ENSMUSG00000096740.8"; transcript_id "be43861b-45dc-42a2-8264-1ab0be2daa9e_REV_pT_Ad5p_TSO3p";
chr19	8772526	8786281	chr19	8600000	9299999	Y	gene_id "ENSMUSG00000003680.16"; transcript_id "2f3ca812-2b26-404a-b640-04868000976b_REV_pT_Ad5p";
chr19	8772526	8786281	chr19	8600000	9299999	Y	gene_id "ENSMUSG00000003680.16"; transcript_id "b87b8fc9-2bd3-414e-8dfa-6b58c531c171_FWD_pA_Ad3p";
chr19	8883924	8890746	chr19	8600000	9299999	Y	gene_id "ENSMUSG00000116166.1"; transcript_id "18e5f997-87d0-40cd-abae-ff63524174a3_FWD_pA_Ad3p";
chr19	8883924	8890746	chr19	8600000	9299999	Y	gene_id "19:8883000"; transcript_id "a2c3b513-725f-430d-b334-a69a06ed02f4_REV_pT_Ad5p_TSO3p";
chr19	8883924	8890746	chr19	8600000	9299999	Y	gene_id "ENSMUSG00000071653.9"; transcript_id "8d9ad19b-70d3-4b3c-be2a-a104ddb7e47a_FWD_pA_Ad3p";
chr19	10502344	10555751	chr19	9900000	11099999	Y	gene_id "ENSMUSG00000024667.12"; transcript_id "20a03837-6cdf-4d50-a859-8c09110797fd_REV_pT_Ad5p_TSO3p";
chr19	11469425	11530068	chr19	11300000	11499999	N	gene_id "ENSMUSG00000024677.13"; transcript_id "dea532f3-514c-4443-aa4d-cf4880e8f02c_FWD_pA_Ad3p";
chr19	18670879	18718428				N	gene_id "ENSMUSG00000024726.10"; transcript_id "5aa14b32-f68a-4db1-a899-772d6992115c_REV_pT_Ad5p_TSO3p";
chr19	23134900	23165471	chr19	23000000	23299999	Y	gene_id "19:23134000"; transcript_id "969f1a25-ed6c-4b42-a82a-6efb29fbb2dd_FWD_pA_Ad3p";
chr19	23988106	24193830	chr19	23800000	24699999	Y	gene_id "ENSMUSG00000071604.5"; transcript_id "cd56138b-5e43-4b3a-ad3b-c21432bdfd14_FWD_pA_Ad3p";
chr19	34550694	34588731	chr19	34400000	34699999	Y	gene_id "19:34550000"; transcript_id "75a7984a-5b3c-43e3-a35d-2a655094875a_FWD_pA_Ad3p";
chr19	34583531	34613401	chr19	34400000	34699999	Y	gene_id "19:34583000"; transcript_id "c76b2bb8-4f70-4460-9d7b-37da4770cbe1_REV_pT_Ad5p_TSO3p";
chr19	47855030	47884753	chr19	47200000	47899999	Y	gene_id "ENSMUSG00000025068.8"; transcript_id "08ba8727-1294-403e-bf40-868b0b348b0c_REV_pT_Ad5p_TSO3p";
chr2	4017717	4145035	chr2	3800000	4199999	Y	gene_id "ENSMUSG00000026657.17"; transcript_id "066d550b-dc08-4da7-b8d4-b6092057ee5a_FWD_pA_Ad3p";
chr2	5862081	5895432	chr2	4800000	5899999	Y	gene_id "ENSMUSG00000025816.15"; transcript_id "c435fb26-eab2-4348-b4ef-c9e0333bb512_REV_pT_Ad5p_TSO3p";
chr2	18672423	18685944	chr2	17500000	19699999	Y	gene_id "ENSMUSG00000026739.13"; transcript_id "7aa170ad-6f71-4dc9-bb6a-2c7d62493499_REV_pT_Ad5p_TSO3p";
chr2	25615411	25621963	chr2	24700000	35299999	Y	gene_id "ENSMUSG00000026939.12"; transcript_id "200a53f9-b38d-41f4-a309-958b35e4a957_REV_pT_Ad5p_TSO3p";
chr2	25615411	25621963	chr2	24700000	35299999	Y	gene_id "ENSMUSG00000026939.12"; transcript_id "6bdcbae7-268e-49a0-b88e-fb4833942844_FWD_pA_Ad3p_TSO5p";
chr2	25615411	25621963	chr2	24700000	35299999	Y	gene_id "ENSMUSG00000026939.12"; transcript_id "e2075bcd-f4c0-4b62-9071-f4c4433efc18_FWD_pA_Ad3p";
chr2	26350295	26355468	chr2	24700000	35299999	Y	gene_id "2:26350000"; transcript_id "cf9df222-1903-47c9-87f9-2dd582dd1d99_FWD_pA_Ad3p";
chr2	26899869	26910677	chr2	24700000	35299999	Y	gene_id "ENSMUSG00000015776.12"; transcript_id "55e3a0b0-c518-4338-9495-443d72513521_FWD_pA_Ad3p_TSO5p";
chr2	30261968	30279526	chr2	24700000	35299999	Y	gene_id "ENSMUSG00000079484.12"; transcript_id "014a8096-45af-4e3d-9c30-028e23f2561d_REV_pT_Ad5p_TSO3p";
chr2	32777381	32847202	chr2	24700000	35299999	Y	gene_id "ENSMUSG00000026797.16"; transcript_id "39475554-8441-4d2e-90ba-ef5286e6dae2_FWD_pA_Ad3p";
chr2	32780122	32847202	chr2	24700000	35299999	Y	gene_id "ENSMUSG00000026797.16"; transcript_id "2af940af-e6d7-427b-952d-f6e7df032f0a_FWD_pA_Ad3p";
chr2	71055784	71137998	chr2	70500000	71399999	Y	gene_id "ENSMUSG00000041966.18"; transcript_id "2772590b-31c9-46b4-9439-4b9abf44de15_FWD_pA_Ad3p";
chr2	79332320	79456636	chr2	78800000	79599999	Y	gene_id "ENSMUSG00000075256.9"; transcript_id "3ad24ded-4a7f-44e2-9b48-322b289b9417_FWD_pA_Ad3p";
chr2	79332502	79456751	chr2	78800000	79599999	Y	gene_id "ENSMUSG00000075256.9"; transcript_id "6b89968a-a83b-425d-9cf0-b7cae9508f24_FWD_pA_Ad3p_TSO5p";
chr2	79389019	79456636	chr2	78800000	79599999	Y	gene_id "ENSMUSG00000075256.9"; transcript_id "44c6e4b8-fd90-4eaa-a17d-644db5870187_REV_pT_Ad5p_TSO3p";
chr2	84669221	84678049	chr2	84300000	84999999	Y	gene_id "ENSMUSG00000050043.16"; transcript_id "000fca0b-8252-40e4-8a29-0fe05463dec1_FWD_pA_Ad3p";
chr2	84669695	84678049	chr2	84300000	84999999	Y	gene_id "ENSMUSG00000050043.16"; transcript_id "f99d3574-51ef-4e1d-8703-6f9a9ab2ad14_REV_pT_Ad5p";
chr2	91184061	91202834	chr2	90500000	91599999	Y	gene_id "ENSMUSG00000002108.10"; transcript_id "cb3513b7-af58-4fd7-a975-fbf89fa72f2f_REV_pT_Ad5p_TSO3p";
chr2	92375306	92383603	chr2	92300000	93799999	Y	gene_id "ENSMUSG00000027222.14"; transcript_id "553aebed-ed0c-4c13-8fbc-ff34d7f37b7a_FWD_pA_Ad3p";
chr2	92375493	92383603	chr2	92300000	93799999	Y	gene_id "ENSMUSG00000027222.14"; transcript_id "0c4cf058-0de4-4181-8661-53dc9fb00541_FWD_pA_Ad3p";
chr2	92375493	92383603	chr2	92300000	93799999	Y	gene_id "ENSMUSG00000027222.14"; transcript_id "3b66b7f1-66f8-49cb-81c4-4427d9118c28_FWD_pA_Ad3p_TSO5p";
chr2	92378846	92383603	chr2	92300000	93799999	Y	gene_id "ENSMUSG00000027222.14"; transcript_id "b0fc066f-da76-40ad-bb24-062e599d261d_REV_pT_Ad5p_TSO3p";
chr2	93940161	94010730	chr2	93800000	94299999	Y	gene_id "ENSMUSG00000040174.14"; transcript_id "82196f18-fc05-4ca4-b0ca-5085f0e4c00b_FWD_pA_Ad3p";
chr2	93940161	94010730	chr2	93800000	94299999	Y	gene_id "ENSMUSG00000040174.14"; transcript_id "99b9efde-6565-4b22-a640-0d11f45e706f_REV_pT_Ad5p_TSO3p";
chr2	93940161	94010730	chr2	93800000	94299999	Y	gene_id "ENSMUSG00000040174.14"; transcript_id "c5b902a0-047e-4b22-961c-c19a8e64909d_REV_pT_Ad5p_TSO3p";
chr2	93940161	94010730	chr2	93800000	94299999	Y	gene_id "ENSMUSG00000040174.14"; transcript_id "d0fdb8e5-6071-4456-b0dd-b3c136ca6594_FWD_pA_Ad3p";
chr2	104071010	104115170	chr2	101500000	104699999	Y	gene_id "ENSMUSG00000032679.12"; transcript_id "0983370b-7a81-4030-b8e3-632cff99461c_FWD_pA_Ad3p";
chr2	104078851	104115170	chr2	101500000	104699999	Y	gene_id "ENSMUSG00000032679.12"; transcript_id "925b88ab-5963-48e7-a2c8-7cbd849ce839_FWD_pA_Ad3p";
chr2	104095801	104124749	chr2	101500000	104699999	Y	gene_id "ENSMUSG00000032679.12"; transcript_id "056e3776-593c-41f8-abcd-5ea57377b7ae_REV_pT_Ad5p_TSO3p";
chr2	105904638	106040634				N	gene_id "ENSMUSG00000042670.5"; transcript_id "32ed9f83-4bfe-4b9b-8c27-79be4e8b5911_REV_pT_Ad5p_TSO3p";
chr2	109890853	109991030	chr2	109700000	109899999	N	gene_id "ENSMUSG00000027162.7"; transcript_id "5267375f-3736-4db0-9223-bd35543f6b82_REV_pT_Ad5p_TSO3p";
chr2	109890853	109996770	chr2	109700000	109899999	N	gene_id "ENSMUSG00000027162.7"; transcript_id "83fbd67d-eaec-45b9-b6bb-e915fd42df54_FWD_pA_Ad3p";
chr2	109890853	110000459	chr2	109700000	109899999	N	gene_id "ENSMUSG00000050199.13"; transcript_id "bd872c5a-d7c3-497e-8bbe-890d1f561eae_FWD_pA_Ad3p";
chr2	113776545	113840702	chr2	113700000	113999999	Y	gene_id "ENSMUSG00000023236.7"; transcript_id "f736213e-b067-4db3-a618-19f013653429_FWD_pA_Ad3p";
chr2	119539384	119662798	chr2	118200000	121899999	Y	gene_id "ENSMUSG00000027305.9"; transcript_id "d836fe76-6306-4317-8f5b-c08d052b7988_FWD_pA_Ad3p_TSO5p";
chr2	121460766	121495131	chr2	118200000	121899999	Y	gene_id "2:121460000"; transcript_id "89fa9ce5-beed-473a-a4c7-c98eb319fc81_REV_pT_Ad5p_TSO3p";
chr2	121461468	121506665	chr2	118200000	121899999	Y	gene_id "ENSMUSG00000068479.5"; transcript_id "751d5b36-e382-489d-924f-066e835f167c_FWD_pA_Ad3p";
chr2	121494011	121549017	chr2	118200000	121899999	Y	gene_id "ENSMUSG00000068479.5"; transcript_id "0e4f16c8-55cc-411c-80f7-5b87cfad402f_FWD_pA_Ad3p";
chr2	121494367	121765108	chr2	118200000	121899999	Y	gene_id "ENSMUSG00000027238.17"; transcript_id "7e0e0c0e-6eaf-4346-b2f7-79920f195c50_REV_pT_Ad5p_TSO3p";
chr2	150218073	150267677	chr2	150100000	150299999	Y	gene_id "ENSMUSG00000079008.2"; transcript_id "35c22128-f19e-4dab-834a-fdab5700df22_REV_pT_Ad5p_TSO3p";
chr2	150218073	150266236	chr2	150100000	150299999	Y	gene_id "2:150218000"; transcript_id "ca3b3a07-4968-4030-a3e1-ce6e7c1426e7_FWD_pA_Ad3p";
chr2	150310935	150451486	chr2	150400000	150899999	N	gene_id "ENSMUSG00000068130.11"; transcript_id "d54df3bb-e054-4b0a-8663-c4d01bf2c4eb_FWD_pA_Ad3p";
chr2	150342973	150451486	chr2	150400000	150899999	N	gene_id "ENSMUSG00000063364.10"; transcript_id "00db2404-d4b0-4e0f-9cca-bb1e62c22b22_REV_pT_Ad5p_TSO3p";
chr2	150342973	150451486	chr2	150400000	150899999	N	gene_id "ENSMUSG00000068130.11"; transcript_id "ccf28b12-32ef-446a-bde9-13609cac30d8_FWD_pA_Ad3p";
chr2	150343591	150451486	chr2	150400000	150899999	N	gene_id "ENSMUSG00000068130.11"; transcript_id "d242d1bb-627e-4466-9005-6be000379ba2_FWD_pA_Ad3p";
chr2	151542585	151589672	chr2	151500000	153599999	Y	gene_id "ENSMUSG00000027456.8"; transcript_id "925ecb57-cace-4033-8f0a-e4f77f25e1fe_REV_pT_Ad5p_TSO3p";
chr2	151946979	151980219	chr2	151500000	153599999	Y	gene_id "ENSMUSG00000087004.1"; transcript_id "9af008ae-61d2-4f14-8f3b-bb8579d3c422_FWD_pA-1_Ad3p";
chr2	157543297	157566337	chr2	154200000	158299999	Y	gene_id "2:157543000"; transcript_id "ddf368b7-e78d-4799-9753-716403b340a9_FWD_pA_Ad3p";
chr2	157543312	157566337	chr2	154200000	158299999	Y	gene_id "2:157543000"; transcript_id "a03a8029-b195-4e29-a250-747cc6e13d73_REV_pT_Ad5p_TSO3p";
chr2	174461075	174472891	chr2	172000000	174799999	Y	gene_id "ENSMUSG00000016252.7"; transcript_id "9881a864-ea5c-4586-b351-71dae7b497a3_FWD_pA_Ad3p";
chr2	176226569	176530329				N	gene_id "2:176226000"; transcript_id "12fa4d74-5697-4d29-b6aa-aa0d7ef867e7_REV_pT_Ad5p_TSO3p";
chr2	176226569	176529474				N	gene_id "ENSMUSG00000095199.8"; transcript_id "b29e5f18-fa1b-45a1-a158-d2248a5faba1_FWD_pA_Ad3p";
chr2	176226569	176529474				N	gene_id "2:176226000"; transcript_id "ce21005b-4d93-4537-8015-2be69d4e3f1f_REV_pT_Ad5p_TSO3p";
chr2	176423594	176530882				N	gene_id "ENSMUSG00000095199.8"; transcript_id "066bd1d9-698e-4d44-9f2d-837a9c8b281e_FWD_pA_Ad3p";
chr2	176423594	176530882				N	gene_id "ENSMUSG00000089951.8"; transcript_id "2e22d1ef-5375-468f-b8ea-97cc819b6043_FWD_pA_Ad3p";
chr2	176423594	176534643				N	gene_id "ENSMUSG00000095199.8"; transcript_id "4138efb0-eb7e-49e1-809c-169fcc18b010_FWD_pA_Ad3p";
chr2	176423594	176534901				N	gene_id "ENSMUSG00000095199.8"; transcript_id "563b3d15-1826-4e30-8a52-ce3bbb4e13ab_REV_pT_Ad5p_TSO3p";
chr2	176423594	176530882				N	gene_id "ENSMUSG00000095199.8"; transcript_id "5915d2a7-3b50-4bdb-925a-c865b520f04d_REV_pT_Ad5p_TSO3p";
chr2	176423594	176534643				N	gene_id "ENSMUSG00000095199.8"; transcript_id "5e30c42d-c563-4b68-8cfe-8bf12745c2a7_FWD_pA_Ad3p_TSO5p";
chr2	176423594	176536775				N	gene_id "ENSMUSG00000089951.8"; transcript_id "64d828a8-0f61-4b2d-9073-098d5392f08c_REV_pT_Ad5p_TSO3p";
chr2	176423594	176534643				N	gene_id "ENSMUSG00000095199.8"; transcript_id "b05d782f-957b-4142-8db9-ca19bf04fac2_FWD_pA_Ad3p";
chr2	176423594	176529474				N	gene_id "ENSMUSG00000089951.8"; transcript_id "fda8c92a-9c3a-4f95-adea-93980e2c2fa0_REV_pT_Ad5p_TSO3p";
chr2	176423594	176530882				N	gene_id "ENSMUSG00000089951.8"; transcript_id "ffd7600f-942d-469a-8390-f100aa2a2458_REV_pT_Ad5p_TSO3p";
chr2	176423594	176719654				N	gene_id "2:176423000"; transcript_id "5ea0386b-0788-4b87-ba27-55a2587bca32_REV_pT_Ad5p_TSO3p";
chr2	176423594	176720892				N	gene_id "ENSMUSG00000095199.8"; transcript_id "a7f16823-7f1a-4ab7-b667-c02a2235650e_REV_pT_Ad5p_TSO3p";
chr2	176521000	176721106				N	gene_id "ENSMUSG00000078878.9"; transcript_id "5b5161e1-1abc-49d5-a14d-fccd90622675_FWD_pA_Ad3p";
chr2	176521000	176719654				N	gene_id "ENSMUSG00000095199.8"; transcript_id "a9298073-aa66-4569-b178-ec3495757dee_REV_pT_Ad5p_TSO3p";
chr2	176521000	176679425				N	gene_id "ENSMUSG00000078879.10"; transcript_id "b483c2b6-7a7b-427a-a397-1a8058cce120_REV_pT_Ad5p_TSO3p";
chr2	176521004	176720481				N	gene_id "ENSMUSG00000078878.9"; transcript_id "d2183ac8-5e3c-4ac0-a748-67d6535ae9cc_REV_pT_Ad5p_TSO3p";
chr2	176521004	176679874				N	gene_id "ENSMUSG00000095199.8"; transcript_id "7a5616c8-eca9-4568-b795-6f2e66817717_FWD_pA_Ad3p";
chr2	176528988	176721190				N	gene_id "ENSMUSG00000078878.9"; transcript_id "f18c440e-7c99-4714-9390-5400a8c55ccb_REV_pT_Ad5p_TSO3p";
chr2	177832982	178078455	chr2	177800000	178099999	Y	gene_id "ENSMUSG00000078862.10"; transcript_id "29189d18-d6a7-484b-99b2-ff115d92e5bc_REV_pT_Ad5p_TSO3p";
chr2	177832985	178078455	chr2	177800000	178099999	Y	gene_id "2:177832000"; transcript_id "a67eb8c8-adf7-4c2d-9463-73e977668215_REV_pT_Ad5p_TSO3p";
chr2	177834387	178078455	chr2	177800000	178099999	Y	gene_id "2:177834000"; transcript_id "6c96a13c-28fa-4498-896f-5226fd22a25f_REV_pT_Ad5p_TSO3p";
chr2	177855143	178078455	chr2	177800000	178099999	Y	gene_id "2:177855000"; transcript_id "ee6365b7-3c82-4cf6-8f8d-57b4b9c4d542_REV_pT_Ad5p_TSO3p";
chr2	177921288	178078455	chr2	177800000	178099999	Y	gene_id "ENSMUSG00000078861.8"; transcript_id "0d2dc0eb-a58b-4711-82b6-775c7c788aae_FWD_pA_Ad3p";
chr2	177935993	178078455	chr2	177800000	178099999	Y	gene_id "ENSMUSG00000078862.10"; transcript_id "5a61f19f-c534-422c-b731-61ab88888b17_FWD_pA_Ad3p";
chr2	177935993	178078455	chr2	177800000	178099999	Y	gene_id "ENSMUSG00000078861.8"; transcript_id "760fc003-626b-420e-bcd9-26d573cf32a4_FWD_pA_Ad3p_TSO5p";
chr2	177935993	178078455	chr2	177800000	178099999	Y	gene_id "2:177935000"; transcript_id "ca255d26-da7a-4896-90c7-8d5f615f82b2_FWD_pA_Ad3p";
chr2	177946512	178078455	chr2	177800000	178099999	Y	gene_id "ENSMUSG00000078861.8"; transcript_id "8bab6f1e-4c0a-4277-aad8-b8db64c55ed0_FWD_pA_Ad3p";
chr2	177946701	178078455	chr2	177800000	178099999	Y	gene_id "ENSMUSG00000078861.8"; transcript_id "27035634-f997-4fb7-8fdb-efc8071e51fc_FWD_pA_Ad3p_TSO5p";
chr2	177946844	178078455	chr2	177800000	178099999	Y	gene_id "ENSMUSG00000078861.8"; transcript_id "46d5d794-d625-42c3-b4b2-4e314a6197b2_REV_pT_Ad5p_TSO3p";
chr2	177946899	178078455	chr2	177800000	178099999	Y	gene_id "2:177946000"; transcript_id "0b004d39-ad69-4b87-b46e-5e29bc3b12da_REV_pT_Ad5p_TSO3p";
chr2	177946899	178078455	chr2	177800000	178099999	Y	gene_id "ENSMUSG00000078862.10"; transcript_id "8e0ebacc-cb02-486f-a98f-c0b2f9743abe_REV_pT_Ad5p_TSO3p";
chr2	177946899	178078455	chr2	177800000	178099999	Y	gene_id "ENSMUSG00000078861.8"; transcript_id "9ed172bb-d5a6-4bac-84de-d4436bab0629_REV_pT_Ad5p_TSO3p";
chr2	177946899	178078455	chr2	177800000	178099999	Y	gene_id "ENSMUSG00000078862.10"; transcript_id "cf8083e2-06f2-4831-a770-82b666817485_REV_pT_Ad5p_TSO3p";
chr2	180119335	180176284	chr2	179800000	181399999	Y	gene_id "ENSMUSG00000039050.8"; transcript_id "22998a63-6bce-4b83-a1d6-a7f0d10edb43_FWD_pA_Ad3p";
chr2	180119335	180176284	chr2	179800000	181399999	Y	gene_id "ENSMUSG00000039050.8"; transcript_id "35e1be63-8034-4801-92b0-1126f853f798_REV_pT_Ad5p";
chr2	180119335	180176284	chr2	179800000	181399999	Y	gene_id "ENSMUSG00000039050.8"; transcript_id "8fb6dcc3-7450-4bb1-89ab-a4e19e422879_FWD_pA_Ad3p";
chr2	181569152	181587844	chr2	181400000	181599999	Y	gene_id "ENSMUSG00000089917.7"; transcript_id "219166c4-ef0c-480b-8d28-d24525c6d0c4_REV_pT_Ad5p_TSO3p";
chr2	181579532	181655660	chr2	181600000	181799999	N	gene_id "ENSMUSG00000002455.14"; transcript_id "8ebb0baf-5920-46a6-9c4b-e5d116b187d5_FWD_pA_Ad3p";
chr2	181837854	181868610				N	gene_id "ENSMUSG00000027589.14"; transcript_id "46595869-0e64-43df-a2e0-7641f6c05d9a_REV_pT_Ad5p_TSO3p";
chr2	181837854	181868610				N	gene_id "ENSMUSG00000027589.14"; transcript_id "7bb9ebe9-dd72-4eef-a505-ef3e73e82d1a_REV_pT_Ad5p_TSO3p";
chr2	181837913	181868610				N	gene_id "ENSMUSG00000027589.14"; transcript_id "511d301f-135a-43d4-beae-75895ea6c056_REV_pT_Ad5p_TSO3p";
chr2	181850958	181870169				N	gene_id "ENSMUSG00000038628.8"; transcript_id "53781671-03ce-4c6f-a646-062f8e768737_FWD_pA_Ad3p";
chr2	181850958	181868610				N	gene_id "ENSMUSG00000038628.8"; transcript_id "5a6be21d-c101-49a5-b001-3df7cfab512b_FWD_pA_Ad3p";
chr2	181850958	181869014				N	gene_id "ENSMUSG00000038628.8"; transcript_id "6cd408ac-5e51-4e72-bcac-2ce56b63c6d1_REV_pT_Ad5p-1_TSO3p";
chr2	181850958	181868610				N	gene_id "ENSMUSG00000038628.8"; transcript_id "86710aef-e217-46d6-aa68-068761166a37_FWD_pA_Ad3p";
chr2	181850958	181869651				N	gene_id "ENSMUSG00000038628.8"; transcript_id "9d13d311-63ed-4a31-a86e-1016a5fb3d52_REV_pT_Ad5p_TSO3p";
chr2	181850958	181868610				N	gene_id "ENSMUSG00000038628.8"; transcript_id "b80aed31-4484-480b-a408-55e70827ffc2_REV_pT_Ad5p_TSO3p";
chr2	181850958	181869949				N	gene_id "ENSMUSG00000038628.8"; transcript_id "c4317f2b-eddc-4518-8701-113bbc9696ae_FWD_pA_Ad3p";
chr3	8802146	8964156	chr3	8500000	10499999	Y	gene_id "3:8802000"; transcript_id "1aa17baa-f12f-4b9e-8bcf-4e0765431f15_REV_pT_Ad5p_TSO3p";
chr3	8802146	9004439	chr3	8500000	10499999	Y	gene_id "ENSMUSG00000040269.5"; transcript_id "505eee84-cff1-4999-8d42-b7e2410d2499_FWD_pA_Ad3p";
chr3	8802146	8964048	chr3	8500000	10499999	Y	gene_id "ENSMUSG00000027506.15"; transcript_id "6596038c-89bd-4ac4-9133-db95df32526e_REV_pT_Ad5p_TSO3p";
chr3	8802146	9004439	chr3	8500000	10499999	Y	gene_id "ENSMUSG00000027506.15"; transcript_id "7882db1c-b698-4917-ba46-e51351b16b9a_REV_pT_Ad5p_TSO3p";
chr3	8802146	8964048	chr3	8500000	10499999	Y	gene_id "ENSMUSG00000027506.15"; transcript_id "b54c59d3-ed59-441f-97a7-53713b1ec978_FWD_pA_Ad3p";
chr3	8802146	9004439	chr3	8500000	10499999	Y	gene_id "ENSMUSG00000027506.15"; transcript_id "b7e0bb00-0497-4625-8df4-7144b7373cb9_FWD_pA_Ad3p";
chr3	8802146	9004439	chr3	8500000	10499999	Y	gene_id "ENSMUSG00000027506.15"; transcript_id "e0627dea-1d6f-4459-a7e4-a1c63ef1562e_FWD_pA_Ad3p_TSO3p";
chr3	10204328	10301183	chr3	8500000	10499999	Y	gene_id "ENSMUSG00000062515.3"; transcript_id "10f78bd5-e6ce-47d0-871a-c0089d4396fc_REV_pT_Ad5p_TSO3p";
chr3	10204328	10301183	chr3	8500000	10499999	Y	gene_id "ENSMUSG00000027530.15"; transcript_id "51907368-94d6-4d18-87b0-1891a84fe1d4_REV_pT_Ad5p_TSO3p";
chr3	37308622	37349740	chr3	37200000	37399999	Y	gene_id "ENSMUSG00000045031.18"; transcript_id "0f684237-106f-45b8-9d85-631751c2c1ab_FWD_pA_Ad3p";
chr3	37308622	37349740	chr3	37200000	37399999	Y	gene_id "ENSMUSG00000054779.5"; transcript_id "33c1b729-bf41-4888-acd5-4400d6d10920_REV_pT_Ad5p_TSO3p";
chr3	37308760	37349740	chr3	37200000	37399999	Y	gene_id "ENSMUSG00000045031.18"; transcript_id "b6cddad5-e82e-4108-94e3-4e62fe893cd8_REV_pT_Ad5p-1_TSO3p";
chr3	40818103	40894123	chr3	40400000	41499999	Y	gene_id "ENSMUSG00000025759.11"; transcript_id "cfb701b4-6291-43c2-ab79-7f7637451573_REV_pT_Ad5p_TSO3p";
chr3	40818103	40894123	chr3	40400000	41499999	Y	gene_id "ENSMUSG00000025759.11"; transcript_id "d25de0f0-5da2-42e2-9ac3-a4b04271c975_REV_pT_Ad5p_TSO3p";
chr3	40819115	40894123	chr3	40400000	41499999	Y	gene_id "ENSMUSG00000025759.11"; transcript_id "9f4ebc72-b1d0-4e8b-bb9d-60c110dde9e3_REV_pT_Ad5p_TSO3p";
chr3	51388412	51408964	chr3	51300000	52799999	Y	gene_id "ENSMUSG00000037152.11"; transcript_id "149ec98c-e7e0-43b1-af30-4baa75819b58_FWD_pA_Ad3p_TSO5p";
chr3	65324318	65392623	chr3	64800000	65899999	Y	gene_id "ENSMUSG00000027828.12"; transcript_id "d864c934-5f64-423b-b7db-926c002a091c_REV_pT_Ad5p_TSO3p";
chr3	85660061	85887518	chr3	83900000	86799999	Y	gene_id "ENSMUSG00000051000.17"; transcript_id "b3ddb09c-f45d-459a-95eb-0becd7986534_FWD_pA_Ad3p";
chr3	85660063	85887368	chr3	83900000	86799999	Y	gene_id "ENSMUSG00000051000.17"; transcript_id "26e57b5c-7cee-4100-b6e8-fbd0459e270c_REV_pT_Ad5p-1_TSO3p";
chr3	85660063	85887368	chr3	83900000	86799999	Y	gene_id "ENSMUSG00000051000.17"; transcript_id "215addb2-ba65-4047-868d-62e299b8caf3_REV_pT_Ad5p_TSO3p";
chr3	85674139	85887368	chr3	83900000	86799999	Y	gene_id "ENSMUSG00000051000.17"; transcript_id "323383c5-8256-4f14-af0b-a686324bd855_REV_pT_Ad5p_TSO3p";
chr3	85674139	85887368	chr3	83900000	86799999	Y	gene_id "ENSMUSG00000051000.17"; transcript_id "34e42bb7-ee6f-4540-8b45-ba817d022ff1_FWD_pA_Ad3p";
chr3	85675988	85887518	chr3	83900000	86799999	Y	gene_id "ENSMUSG00000051000.17"; transcript_id "323383c5-8256-4f14-af0b-a686324bd855_REV_pT_Ad5p-1_TSO3p";
chr3	85683420	85887518	chr3	83900000	86799999	Y	gene_id "ENSMUSG00000051000.17"; transcript_id "a02d81ff-5073-4704-a261-9dfbd9644ab4_REV_pT_Ad5p_TSO3p";
chr3	85687671	85887518	chr3	83900000	86799999	Y	gene_id "ENSMUSG00000051000.17"; transcript_id "10fd3f78-9d76-4a4f-9ab2-60a79446c046_FWD_pA_Ad3p";
chr3	85687671	85887368	chr3	83900000	86799999	Y	gene_id "ENSMUSG00000051000.17"; transcript_id "a9c93866-c607-45d0-94a0-4c1ce663777c_FWD_pA-1_Ad3p";
chr3	85687671	85887368	chr3	83900000	86799999	Y	gene_id "ENSMUSG00000051000.17"; transcript_id "73125434-cf76-40ed-851c-8cb6e59c9b87_REV_pT_Ad5p";
chr3	85687671	85887368	chr3	83900000	86799999	Y	gene_id "ENSMUSG00000051000.17"; transcript_id "ada86e3b-56c8-4602-a0f7-e6ea1adfe6f4_FWD_pA-1_Ad3p";
chr3	85688017	85887368	chr3	83900000	86799999	Y	gene_id "ENSMUSG00000051000.17"; transcript_id "23053230-08d3-47bd-92fc-4c2086f17177_FWD_pA_Ad3p";
chr3	85688037	85887368	chr3	83900000	86799999	Y	gene_id "ENSMUSG00000051000.17"; transcript_id "64927239-318c-4130-9e12-83bf3f62b475_FWD_pA_Ad3p";
chr3	85688037	85887518	chr3	83900000	86799999	Y	gene_id "ENSMUSG00000051000.17"; transcript_id "d405c4b4-20af-4e81-b286-4f782379fba5_REV_pT_Ad5p_TSO3p";
chr3	85720355	85887368	chr3	83900000	86799999	Y	gene_id "ENSMUSG00000051000.17"; transcript_id "8d6d76eb-4374-4889-b4a2-eb7c70dce8fa_REV_pT_Ad5p_TSO3p";
chr3	85721410	85887368	chr3	83900000	86799999	Y	gene_id "ENSMUSG00000051000.17"; transcript_id "af919241-7139-4ab8-9d07-09877e79c617_REV_pT_Ad5p_TSO3p";
chr3	87906537	87923662	chr3	87500000	90299999	Y	gene_id "ENSMUSG00000019710.13"; transcript_id "177ce46e-55d7-4c8d-902c-de41f77ddac5_REV_pT_Ad5p_TSO3p";
chr3	87913368	87923451	chr3	87500000	90299999	Y	gene_id "ENSMUSG00000019710.13"; transcript_id "bb2bedb6-1a8e-4101-a8de-75e4cf9a2d55_REV_pT_Ad5p_TSO3p";
chr3	88383695	88399754	chr3	87500000	90299999	Y	gene_id "ENSMUSG00000074483.2"; transcript_id "208653b3-8bb4-41e1-9343-0b9de285206d_FWD_pA_Ad3p_TSO5p";
chr3	88394143	88425112	chr3	87500000	90299999	Y	gene_id "ENSMUSG00000050144.13"; transcript_id "2b3ff59e-ded7-4a72-91b8-a73c3340a862_REV_pT_Ad5p_TSO3p";
chr3	88394143	88425112	chr3	87500000	90299999	Y	gene_id "ENSMUSG00000028066.15"; transcript_id "eb04ee37-3559-499b-9a19-bf7ca725c785_FWD_pA_Ad3p";
chr3	88788336	88854647	chr3	87500000	90299999	Y	gene_id "ENSMUSG00000054199.17"; transcript_id "d644e23c-bc00-4fa4-a346-87325fba9134_REV_pT_Ad5p";
chr3	88820963	88900499	chr3	87500000	90299999	Y	gene_id "ENSMUSG00000054199.17"; transcript_id "1e74c281-8458-4431-990e-6a3e07f03cfa_FWD_pA_Ad3p";
chr3	88821270	88900499	chr3	87500000	90299999	Y	gene_id "ENSMUSG00000054199.17"; transcript_id "854a4248-040a-4dd3-acdf-bcde3c11970e_REV_pT_Ad5p_TSO3p";
chr3	90498956	90514278	chr3	90300000	90499999	N	gene_id "ENSMUSG00000001017.15"; transcript_id "202c8ab0-2094-4986-90c1-b2ee80b089fa_FWD_pA_Ad3p";
chr3	94399240	94426388	chr3	94100000	94699999	Y	gene_id "ENSMUSG00000041912.12"; transcript_id "6bb8d468-40c2-4764-be0c-377dfed12cc0_REV_pT_Ad5p_TSO3p";
chr3	95111042	95129205	chr3	94700000	96099999	Y	gene_id "ENSMUSG00000008958.14"; transcript_id "1714c8de-6ba4-4107-a446-84fbdbcec63d_FWD_pA_Ad3p";
chr3	95871531	95897445	chr3	94700000	96099999	Y	gene_id "ENSMUSG00000015750.15"; transcript_id "1f327a83-1971-4b03-9ee0-1fcfe1470652_REV_pT_Ad5p_TSO3p";
chr3	97901216	97967018	chr3	97400000	98199999	Y	gene_id "3:97901000"; transcript_id "1bff4444-1292-4d41-a4ab-8529c3d6493c_FWD_pA_Ad3p";
chr3	104794836	104864400	chr3	102800000	104899999	Y	gene_id "ENSMUSG00000002227.15"; transcript_id "b10e906d-5461-4063-8eb1-9edeb5bd9c4f_REV_pT_Ad5p_TSO3p";
chr3	104805408	104864400	chr3	102800000	104899999	Y	gene_id "ENSMUSG00000070372.11"; transcript_id "8690c914-e019-4aa1-b5da-f2e44d56fc70_REV_pT_Ad5p_TSO3p";
chr3	106001561	106132120				N	gene_id "ENSMUSG00000062778.12"; transcript_id "20c710e8-09c9-488b-b6c5-4a24b5452e14_FWD_pA_Ad3p";
chr3	106001561	106132120				N	gene_id "ENSMUSG00000062778.12"; transcript_id "7ae827b5-94b5-4816-9ded-f0554af0df26_FWD_pA_Ad3p";
chr3	107211293	107237261	chr3	107000000	108899999	Y	gene_id "ENSMUSG00000046213.9"; transcript_id "135e7266-78d8-42aa-b24e-e911b712507b_FWD_pA_Ad3p";
chr3	107211293	107237261	chr3	107000000	108899999	Y	gene_id "ENSMUSG00000046213.9"; transcript_id "1d96fa52-70c3-425f-ae70-e4f2fd2f4fa9_REV_pT_Ad5p_TSO3p";
chr3	107211293	107237261	chr3	107000000	108899999	Y	gene_id "ENSMUSG00000046213.9"; transcript_id "979fca78-5338-4df5-af16-e40d21f12b1f_REV_pT_Ad5p_TSO3p";
chr3	107906782	108017806	chr3	107000000	108899999	Y	gene_id "ENSMUSG00000040562.12"; transcript_id "00d8fe5d-8e1d-4213-8cd7-145432e994a4_REV_pT_Ad5p_TSO3p";
chr3	107906782	107986421	chr3	107000000	108899999	Y	gene_id "ENSMUSG00000040562.12"; transcript_id "26e0be55-4d9c-4969-88f2-4ac13d39c032_REV_pT_Ad5p_TSO3p";
chr3	107906782	107986421	chr3	107000000	108899999	Y	gene_id "ENSMUSG00000040562.12"; transcript_id "728ffaef-02af-4558-bf9e-ed7c067ac18d_FWD_pA_Ad3p";
chr3	107906782	107986421	chr3	107000000	108899999	Y	gene_id "ENSMUSG00000040562.12"; transcript_id "ed408257-3a02-4536-ad3a-6653e24fd9d4_FWD_pA_Ad3p";
chr3	107906782	107986421	chr3	107000000	108899999	Y	gene_id "ENSMUSG00000040562.12"; transcript_id "f3a65e94-13ca-4a27-ba4d-45e4519efd07_REV_pT_Ad5p_TSO3p";
chr3	107906782	108017806	chr3	107000000	108899999	Y	gene_id "ENSMUSG00000058135.12"; transcript_id "c00de4bd-0284-40a2-b425-92cb2f5a2898_REV_pT_Ad5p_TSO3p";
chr3	107964229	108017806	chr3	107000000	108899999	Y	gene_id "ENSMUSG00000040562.12"; transcript_id "17fce74f-bbfa-4f1b-ac45-8d2931d41fe8_REV_pT_Ad5p_TSO3p";
chr3	107964229	108017806	chr3	107000000	108899999	Y	gene_id "ENSMUSG00000040562.12"; transcript_id "c44c8f45-5f84-4fb8-91d5-1f687d48c1be_FWD_pA_Ad3p";
chr3	107964229	107986421	chr3	107000000	108899999	Y	gene_id "ENSMUSG00000040562.12"; transcript_id "38ae0d19-ade8-4ab7-83b4-85cbf04a93fd_REV_pT_Ad5p";
chr3	107964229	107986421	chr3	107000000	108899999	Y	gene_id "ENSMUSG00000040562.12"; transcript_id "4199c7d6-cc0c-4be8-b355-9b2746def628_REV_pT_Ad5p_TSO3p";
chr3	107964229	108044681	chr3	107000000	108899999	Y	gene_id "ENSMUSG00000040562.12"; transcript_id "53f4925d-4c10-4583-9398-05e6aa4cab5c_REV_pT_Ad5p_TSO3p";
chr3	113555953	113615440	chr3	113400000	113599999	N	gene_id "ENSMUSG00000074264.12"; transcript_id "a6913084-9971-43d0-bafc-2080439920de_FWD_pA_Ad3p_TSO3p";
chr3	113555953	113606699	chr3	113400000	113599999	N	gene_id "ENSMUSG00000074264.12"; transcript_id "bba49238-39c2-4032-a314-be19d11f1d2e_REV_pT_Ad5p";
chr3	113555953	113621965	chr3	113400000	113599999	N	gene_id "ENSMUSG00000027981.14"; transcript_id "ff94206e-05b8-4201-a438-5104e8be8491_REV_pT_Ad5p_TSO3p";
chr3	129878814	129913950				N	gene_id "ENSMUSG00000027997.9"; transcript_id "7ab9f555-8457-44ce-b401-b14a4f4ae44e_FWD_pA_Ad3p";
chr3	132842202	132950160	chr3	132400000	133399999	Y	gene_id "ENSMUSG00000040998.18"; transcript_id "125e6e37-b32a-4525-8d40-9927dd889cb8_FWD_pA_Ad3p_TSO3p";
chr3	132842202	132950160	chr3	132400000	133399999	Y	gene_id "ENSMUSG00000040998.18"; transcript_id "ff25687d-4122-47fa-81ec-6d3e2e8604b8_REV_pT_Ad5p_TSO3p";
chr3	135408236	135438665				N	gene_id "ENSMUSG00000028165.9"; transcript_id "10d0886a-b71c-49b0-9d1f-51e9ae274e4e_FWD_pA_Ad3p";
chr3	137918526	138017323				N	gene_id "ENSMUSG00000091512.5"; transcript_id "565e2076-55de-4663-8150-208ac0aa3d52_FWD_pA_Ad3p";
chr3	146454345	146505547	chr3	145200000	146599999	Y	gene_id "ENSMUSG00000028189.12"; transcript_id "564570ed-d837-48f6-b60e-7decb0ef4e81_REV_pT_Ad5p_TSO3p";
chr3	146454345	146505547	chr3	145200000	146599999	Y	gene_id "ENSMUSG00000028189.12"; transcript_id "67e43267-5b79-41ed-a842-a1e34c5981bd_REV_pT_Ad5p_TSO3p";
chr3	154597144	154696176	chr3	154400000	154599999	N	gene_id "ENSMUSG00000028199.18"; transcript_id "70be094e-9ec6-4359-9543-ed4080f41b0a_FWD_pA_Ad3p";
chr3	154597197	154698656	chr3	154400000	154599999	N	gene_id "ENSMUSG00000028199.18"; transcript_id "409f363c-30ae-41fe-ac5a-99b9ca750568_REV_pT_Ad5p_TSO3p";
chr4	11579665	11615805	chr4	11500000	11999999	Y	gene_id "ENSMUSG00000078773.11"; transcript_id "182cde05-9aa6-4995-a40a-a41de7157b66_REV_pT_Ad5p_TSO3p";
chr4	11579665	11615805	chr4	11500000	11999999	Y	gene_id "ENSMUSG00000078773.11"; transcript_id "64d44e2f-cd79-4db0-96ca-6d31563f5dd3_FWD_pA_Ad3p_TSO5p";
chr4	11579665	11601325	chr4	11500000	11999999	Y	gene_id "ENSMUSG00000078773.11"; transcript_id "7e182efe-5bd4-4b3f-ba3f-9789ed87427a_FWD_pA_Ad3p_TSO5p";
chr4	11579665	11615805	chr4	11500000	11999999	Y	gene_id "ENSMUSG00000078773.11"; transcript_id "8821c332-e2ec-4b03-b240-fb9790e9d895_REV_pT_Ad5p_TSO3p";
chr4	11579665	11615805	chr4	11500000	11999999	Y	gene_id "ENSMUSG00000078773.11"; transcript_id "b193b4ef-1992-48e1-b9bb-a7d07788adbb_FWD_pA_Ad3p_TSO5p";
chr4	11579665	11615805	chr4	11500000	11999999	Y	gene_id "ENSMUSG00000078773.11"; transcript_id "c62a0f57-8429-4c18-b48a-063530d08a2a_REV_pT_Ad5p";
chr4	11579665	11615805	chr4	11500000	11999999	Y	gene_id "ENSMUSG00000078773.11"; transcript_id "cbde1f6c-38bd-4221-8d82-c88113c32932_REV_pT_Ad5p_TSO3p";
chr4	11579665	11601325	chr4	11500000	11999999	Y	gene_id "ENSMUSG00000078773.11"; transcript_id "e174bc38-d76a-460b-9490-543d3f64124d_FWD_pA_Ad3p";
chr4	21727767	21780405	chr4	21600000	21899999	Y	gene_id "ENSMUSG00000028252.20"; transcript_id "7ab15a78-c73e-485e-b946-0cf83a1f78e2_FWD_pA_Ad3p";
chr4	33031528	33095865	chr4	32700000	33499999	Y	gene_id "ENSMUSG00000023267.10"; transcript_id "0c22e8f4-1a12-4775-8449-55edaad9063f_REV_pT_Ad5p_TSO3p";
chr4	33031528	33095865	chr4	32700000	33499999	Y	gene_id "ENSMUSG00000023267.10"; transcript_id "23c1d46f-86b2-457d-89c8-49d699d6accf_REV_pT_Ad5p_TSO3p";
chr4	33031528	33095865	chr4	32700000	33499999	Y	gene_id "ENSMUSG00000023267.10"; transcript_id "b430f829-eb84-4217-ad31-33408915cd6a_REV_pT_Ad5p_TSO3p";
chr4	34768664	34882960	chr4	34500000	34899999	Y	gene_id "ENSMUSG00000028295.14"; transcript_id "9c90bbf1-063e-4b04-b284-233607a81312_REV_pT_Ad5p_TSO3p";
chr4	41349048	41480926	chr4	40600000	41699999	Y	gene_id "ENSMUSG00000028437.14"; transcript_id "01edd99a-609d-4229-b699-a6ec6fc857ea_FWD_pA_Ad3p";
chr4	41756262	41769474				N	gene_id "ENSMUSG00000073889.10"; transcript_id "5a59541d-61db-4c9b-864d-72251343cd3c_REV_pT_Ad5p_TSO3p";
chr4	42153484	42294855	chr4	42000000	42199999	N	gene_id "ENSMUSG00000094695.2"; transcript_id "066d8a23-3989-4a8f-a24c-cc8c244dde04_REV_pT_Ad5p_TSO3p";
chr4	42153484	42294855	chr4	42000000	42199999	N	gene_id "ENSMUSG00000073877.10"; transcript_id "5a7a267a-df5a-43e4-807a-33fbdada601f_FWD_pA_Ad3p";
chr4	43651335	43656443	chr4	42900000	46699999	Y	gene_id "ENSMUSG00000066196.11"; transcript_id "304d1ded-2747-4ae2-b499-7fcc52eeae75_REV_pT_Ad5p_TSO3p";
chr4	94460931	94556796	chr4	94400000	94599999	Y	gene_id "ENSMUSG00000087128.7"; transcript_id "29ecaa9e-cbab-47dd-a0c9-2a99ac3abb3d_REV_pT_Ad5p_TSO3p";
chr4	94460931	94556796	chr4	94400000	94599999	Y	gene_id "ENSMUSG00000028578.8"; transcript_id "9fb7d40a-f0ad-4869-a598-bf5741917fbd_FWD_pA_Ad3p";
chr4	94460931	94556796	chr4	94400000	94599999	Y	gene_id "ENSMUSG00000087128.7"; transcript_id "f4ad33c7-d5ae-478f-af59-25cd193a1e09_FWD_pA_Ad3p";
chr4	101177727	101356353	chr4	100800000	102999999	Y	gene_id "ENSMUSG00000028530.14"; transcript_id "e7a4cf9f-37e9-495e-87ba-e73d15827158_FWD_pA_Ad3p";
chr4	108564870	108619849	chr4	106200000	108999999	Y	gene_id "ENSMUSG00000063800.5"; transcript_id "18e8af1a-b9d7-468a-8eee-710c9e73f858_FWD_pA_Ad3p";
chr4	108564870	108619849	chr4	106200000	108999999	Y	gene_id "ENSMUSG00000063800.5"; transcript_id "cb7ed0b3-6790-42a5-a88f-44ad0236d562_FWD_pA_Ad3p";
chr4	108564873	108619849	chr4	106200000	108999999	Y	gene_id "ENSMUSG00000063800.5"; transcript_id "e1da4dfa-f55e-4c7f-9cf1-f2e0b9a1aef4_REV_pT_Ad5p_TSO3p";
chr4	108834635	108941188	chr4	106200000	108999999	Y	gene_id "ENSMUSG00000028567.8"; transcript_id "2efe5aca-3145-4967-bbff-02a41055eb2f_FWD_pA_Ad3p";
chr4	119205253	119232712				N	gene_id "ENSMUSG00000078584.9"; transcript_id "3ede30eb-6f46-4b15-882c-f1c89c0791be_REV_pT_Ad5p_TSO3p";
chr4	119205253	119232712				N	gene_id "ENSMUSG00000078584.9"; transcript_id "98832ea4-7479-4a21-a0a9-0904c74d7283_FWD_pA_Ad3p";
chr4	119205508	119232712				N	gene_id "ENSMUSG00000078584.9"; transcript_id "b65fd016-205a-4cf0-9f19-5ab35954191e_FWD_pA_Ad3p";
chr4	123905041	123936993	chr4	123700000	124299999	Y	gene_id "ENSMUSG00000028646.16"; transcript_id "2ce1ba11-5a0e-436a-b2f2-d258fa982dbc_FWD_pA_Ad3p";
chr4	126058565	126098581				N	gene_id "ENSMUSG00000042616.8"; transcript_id "86b6d019-8f2f-443b-b4b5-a384d9da3627_FWD_pA_Ad3p";
chr4	126058565	126098581				N	gene_id "ENSMUSG00000042616.8"; transcript_id "be99c728-a3f3-4e1e-bdf4-60800b6a4031_REV_pT_Ad5p_TSO3p";
chr4	129591960	129623528	chr4	128200000	141499999	Y	gene_id "ENSMUSG00000028798.16"; transcript_id "48aac6ca-a763-461c-ac33-6d25e963c866_FWD_pA_Ad3p";
chr4	129608529	129619099	chr4	128200000	141499999	Y	gene_id "ENSMUSG00000078552.10"; transcript_id "313020f3-ddb3-4452-b4f3-fd9bab62adc0_FWD_pA_Ad3p";
chr4	129608529	129619099	chr4	128200000	141499999	Y	gene_id "ENSMUSG00000040795.12"; transcript_id "31e06bd8-6a19-431d-9cbd-f4e96beb7f14_FWD_pA_Ad3p";
chr4	129608529	129619099	chr4	128200000	141499999	Y	gene_id "ENSMUSG00000078552.10"; transcript_id "353e7b47-9a7b-4ed6-8587-3806bff1d90e_REV_pT_Ad5p_TSO3p";
chr4	129608529	129619099	chr4	128200000	141499999	Y	gene_id "ENSMUSG00000078552.10"; transcript_id "6d465c81-3ab5-4179-8422-7595817ee07d_FWD_pA_Ad3p";
chr4	129608529	129619099	chr4	128200000	141499999	Y	gene_id "ENSMUSG00000040795.12"; transcript_id "8881ae0d-a3b8-47e7-951f-a1ae632712dc_FWD_pA_Ad3p";
chr4	129608529	129619099	chr4	128200000	141499999	Y	gene_id "ENSMUSG00000040795.12"; transcript_id "91aa15fa-a22c-45e0-8662-9fa17b2a6fcd_FWD_pA_Ad3p";
chr4	129608529	129619099	chr4	128200000	141499999	Y	gene_id "ENSMUSG00000078552.10"; transcript_id "b55a3e8b-641b-411a-bdfa-78872b22c5aa_REV_pT_Ad5p_TSO3p";
chr4	132331923	132353686	chr4	128200000	141499999	Y	gene_id "ENSMUSG00000028896.13"; transcript_id "4571f503-f00b-4bb3-91a4-9c7f99e8ffd8_FWD_pA_Ad3p";
chr4	132826929	132884509	chr4	128200000	141499999	Y	gene_id "ENSMUSG00000028882.13"; transcript_id "8cb5db70-5d8c-4df4-b033-bc020cca36b5_REV_pT_Ad5p_TSO3p";
chr4	132826929	132884509	chr4	128200000	141499999	Y	gene_id "ENSMUSG00000028879.4"; transcript_id "c503d888-5c36-467b-8ac0-4265c8f4e871_REV_pT_Ad5p-1_TSO3p";
chr4	133574745	133591735	chr4	128200000	141499999	Y	gene_id "ENSMUSG00000028850.2"; transcript_id "49e14a58-75d1-42df-98e5-9f66a9575002_FWD_pA_Ad3p";
chr4	135369271	135433823	chr4	128200000	141499999	Y	gene_id "ENSMUSG00000059713.12"; transcript_id "65fde12a-288e-4206-8a3f-87d028e706d1_FWD_pA_Ad3p";
chr4	135369271	135433823	chr4	128200000	141499999	Y	gene_id "ENSMUSG00000043924.16"; transcript_id "74f8c466-fa4f-43f2-941b-26d72a03b9d6_REV_pT_Ad5p_TSO3p";
chr4	139082284	139130994	chr4	128200000	141499999	Y	gene_id "ENSMUSG00000041120.6"; transcript_id "86b6ba37-be50-45ed-90a2-eede317e2445_FWD_pA_Ad3p";
chr4	147021850	147140096	chr4	147000000	147199999	Y	gene_id "ENSMUSG00000067916.9"; transcript_id "2d352e0c-281d-42b1-ad72-0367bf3a50ee_REV_pT_Ad5p_TSO3p";
chr4	147021850	147178632	chr4	147000000	147199999	Y	gene_id "ENSMUSG00000067916.9"; transcript_id "8cdcb043-ce7f-4356-826a-b66db1fee820_FWD_pA_Ad3p_TSO5p";
chr4	147613718	147702553	chr4	147400000	151899999	Y	gene_id "ENSMUSG00000066000.12"; transcript_id "4db13e8a-424a-4ab5-bd7c-0d8cb684807f_REV_pT_Ad5p_TSO3p";
chr4	147753974	147848366	chr4	147400000	151899999	Y	gene_id "ENSMUSG00000059423.13"; transcript_id "7aec7cb2-d2d2-4311-b33d-25369cecb03f_FWD_pA_Ad3p";
chr4	147753974	147848366	chr4	147400000	151899999	Y	gene_id "ENSMUSG00000078495.10"; transcript_id "7d54f037-8965-4380-9bb2-179d03989a1e_FWD_pA_Ad3p";
chr4	147753974	147848366	chr4	147400000	151899999	Y	gene_id "ENSMUSG00000078495.10"; transcript_id "81f365cc-14ba-4f47-8ef6-f2c385e8ea33_REV_pT_Ad5p_TSO3p";
chr4	147753974	147848366	chr4	147400000	151899999	Y	gene_id "ENSMUSG00000059423.13"; transcript_id "ac567d8c-8313-4f9d-9d4b-b2bd8f5e6b20_FWD_pA_Ad3p_TSO5p3p";
chr4	147753974	147848366	chr4	147400000	151899999	Y	gene_id "ENSMUSG00000078495.10"; transcript_id "d21d3fab-7d12-4eaf-b599-4c551f0539a1_FWD_pA_Ad3p";
chr4	147753974	147848366	chr4	147400000	151899999	Y	gene_id "ENSMUSG00000078495.10"; transcript_id "f6099c60-7afc-45d2-8a22-fda48dbe6aa1_REV_pT_Ad5p_TSO3p";
chr4	147755769	147848366	chr4	147400000	151899999	Y	gene_id "ENSMUSG00000059423.13"; transcript_id "137ddc70-3d26-4434-8fac-2b1490e49a27_REV_pT_Ad5p";
chr4	147755934	147848366	chr4	147400000	151899999	Y	gene_id "ENSMUSG00000078495.10"; transcript_id "375dd813-ee82-48ba-9fb3-77c0a97faaf5_FWD_pA-1_Ad3p";
chr4	147756007	147848366	chr4	147400000	151899999	Y	gene_id "ENSMUSG00000078495.10"; transcript_id "07f0c812-e0d2-48d8-a940-eacd5d969c2c_REV_pT_Ad5p_TSO3p";
chr4	148072997	148088031	chr4	147400000	151899999	Y	gene_id "ENSMUSG00000029007.8"; transcript_id "864bd920-b36f-47d6-a4ad-2945250a7326_FWD_pA_Ad3p";
chr4	148145787	148160083	chr4	147400000	151899999	Y	gene_id "ENSMUSG00000055401.14"; transcript_id "059e9e32-0e19-4e83-b21b-22127621c9f5_FWD_pA_Ad3p";
chr4	148145787	148160083	chr4	147400000	151899999	Y	gene_id "ENSMUSG00000055401.14"; transcript_id "17c1abca-b2be-4548-81ec-6b402d685531_FWD_pA_Ad3p";
chr4	148145787	148159851	chr4	147400000	151899999	Y	gene_id "ENSMUSG00000055401.14"; transcript_id "3377fe6a-9778-4418-90ea-eaa2ec90c909_FWD_pA_Ad3p_TSO3p";
chr4	148145787	148158803	chr4	147400000	151899999	Y	gene_id "ENSMUSG00000055401.14"; transcript_id "429a2c86-080d-40d0-83e9-90886e78875b_FWD_pA_Ad3p";
chr4	148145787	148159851	chr4	147400000	151899999	Y	gene_id "ENSMUSG00000055401.14"; transcript_id "83aafecc-4f47-4d22-bf6e-0df9425a763a_FWD_pA_Ad3p";
chr4	148145787	148159595	chr4	147400000	151899999	Y	gene_id "ENSMUSG00000055401.14"; transcript_id "95edd6de-3e75-47e1-a83e-cf2d20f5e7ba_FWD_pA_Ad3p";
chr4	148145787	148159851	chr4	147400000	151899999	Y	gene_id "ENSMUSG00000055401.14"; transcript_id "a8756a48-3641-4c18-a4fb-367e35f9ed22_FWD_pA_Ad3p";
chr4	148145787	148159851	chr4	147400000	151899999	Y	gene_id "ENSMUSG00000029001.15"; transcript_id "adfec7d6-cbca-4929-bb11-2b749d8a2a77_REV_pT_Ad5p_TSO3p";
chr4	149125191	149137629	chr4	147400000	151899999	Y	gene_id "ENSMUSG00000073705.10"; transcript_id "4f294b93-d762-468c-87a1-85615cd21703_FWD_pA_Ad3p";
chr4	149744472	149780860	chr4	147400000	151899999	Y	gene_id "ENSMUSG00000028982.9"; transcript_id "82567971-da7d-42e5-a3b5-e3e3113fe750_FWD_pA_Ad3p";
chr4	155384980	155421704	chr4	155300000	155699999	Y	gene_id "ENSMUSG00000029054.8"; transcript_id "30cc898d-cb22-4b46-b205-702652669966_REV_pT_Ad5p_TSO3p";
chr4	156331103	156355905				N	gene_id "4:156331000"; transcript_id "f4c45f70-2959-4ebd-8086-26a8fbc538d9_FWD_pA_Ad3p";
chr5	5437827	5514912	chr5	5400000	5799999	Y	gene_id "ENSMUSG00000079666.8"; transcript_id "bc6cedb4-02ee-46cf-88f4-74021d021a50_REV_pT_Ad5p_TSO3p";
chr5	5437832	5514912	chr5	5400000	5799999	Y	gene_id "ENSMUSG00000079666.8"; transcript_id "2523e698-d619-4cef-85ad-2abac9b3621a_REV_pT_Ad5p_TSO3p";
chr5	5437832	5514912	chr5	5400000	5799999	Y	gene_id "ENSMUSG00000079666.8"; transcript_id "647aace8-7a81-4ded-9469-d0dee4df90d9_FWD_pA_Ad3p";
chr5	5437832	5514912	chr5	5400000	5799999	Y	gene_id "ENSMUSG00000079666.8"; transcript_id "7ad40295-91f9-4b29-b98c-b0a3bdbeea40_REV_pT_Ad5p_TSO3p";
chr5	5450608	5514321	chr5	5400000	5799999	Y	gene_id "ENSMUSG00000079666.8"; transcript_id "3e5e8cd1-303a-40f1-9dd1-39536b593a5e_FWD_pA_Ad3p";
chr5	5455770	5514912	chr5	5400000	5799999	Y	gene_id "ENSMUSG00000079666.8"; transcript_id "2b186186-e21c-4b20-ae30-deddf287b934_REV_pT_Ad5p_TSO3p";
chr5	5623930	5682792	chr5	5400000	5799999	Y	gene_id "ENSMUSG00000040473.15"; transcript_id "506131b2-4c19-49ed-b4d0-48e69f65cf3c_REV_pT_Ad5p";
chr5	5646991	5694578	chr5	5400000	5799999	Y	gene_id "ENSMUSG00000015653.13"; transcript_id "d639647b-4aac-4775-94ba-906f3e9c8fec_REV_pT_Ad5p_TSO3p";
chr5	22528321	22550304	chr5	22000000	23399999	Y	gene_id "ENSMUSG00000029012.11"; transcript_id "a3f0f262-5b9c-42fa-9a60-be72a76a9d74_FWD_pA_Ad3p";
chr5	24803248	24908452	chr5	24200000	25399999	Y	gene_id "ENSMUSG00000028945.9"; transcript_id "20a998d3-4512-44af-82bf-9437227534c5_REV_pT_Ad5p_TSO3p";
chr5	31613956	32084962	chr5	30400000	37399999	Y	gene_id "ENSMUSG00000052139.18"; transcript_id "cbc48f28-1cea-4229-afab-8627dcc9e5e2_FWD_pA_Ad3p";
chr5	31613972	32084962	chr5	30400000	37399999	Y	gene_id "ENSMUSG00000052139.18"; transcript_id "0223ff02-a861-4c0c-b5d3-e92a51b664b2_REV_pT_Ad5p_TSO3p";
chr5	31613972	32084962	chr5	30400000	37399999	Y	gene_id "ENSMUSG00000052139.18"; transcript_id "92b48a29-ff92-438a-b085-2f85cec77361_REV_pT_Ad5p_TSO5p3p";
chr5	31655281	32084962	chr5	30400000	37399999	Y	gene_id "ENSMUSG00000052139.18"; transcript_id "69edf511-e0ba-4daa-8a33-243c500a38e7_REV_pT_Ad5p_TSO3p";
chr5	31655295	32084962	chr5	30400000	37399999	Y	gene_id "ENSMUSG00000052139.18"; transcript_id "d9cd94d5-1260-4f99-8d12-f966f99882e2_REV_pT_Ad5p_TSO3p";
chr5	31655302	32084962	chr5	30400000	37399999	Y	gene_id "ENSMUSG00000052139.18"; transcript_id "ab449154-af40-4f2d-82d5-94c969e3c6ce_REV_pT_Ad5p_TSO3p";
chr5	31655302	32084962	chr5	30400000	37399999	Y	gene_id "ENSMUSG00000052139.18"; transcript_id "d5ca5f6f-35b7-4376-ae1d-fc3708d0198d_REV_pT_Ad5p_TSO3p";
chr5	44067099	44101681	chr5	44000000	44699999	Y	gene_id "ENSMUSG00000029086.15"; transcript_id "4d26ce0b-0233-4b80-af96-9122f9ba7c0d_REV_pT_Ad5p_TSO3p";
chr5	45493374	45525605	chr5	44700000	45799999	Y	gene_id "ENSMUSG00000039682.12"; transcript_id "3dd33528-1f45-450a-bc77-c5dfc9f2b784_REV_pT_Ad5p_TSO3p";
chr5	45493374	45525605	chr5	44700000	45799999	Y	gene_id "ENSMUSG00000039682.12"; transcript_id "de7a9879-980a-4d61-ae95-e47aacc4c918_FWD_pA_Ad3p";
chr5	106500894	106696546	chr5	96400000	152299999	Y	gene_id "ENSMUSG00000099061.1"; transcript_id "1cb7e366-12cb-45a1-8abf-cd3160fa1e0f_REV_pT_Ad5p";
chr5	106557739	106696546	chr5	96400000	152299999	Y	gene_id "5:106557000"; transcript_id "f0834aa5-1bf2-4a58-b404-7babc02edc51_FWD_pA_Ad3p";
chr5	107359613	107430035	chr5	96400000	152299999	Y	gene_id "ENSMUSG00000033805.12"; transcript_id "236425b0-4a1f-4789-bbfc-93ffd9356318_FWD_pA_Ad3p";
chr5	107359613	107430035	chr5	96400000	152299999	Y	gene_id "ENSMUSG00000033805.12"; transcript_id "82e405de-a7ca-4c0b-8df3-2d633196b28b_REV_pT_Ad5p_TSO3p";
chr5	107359613	107430035	chr5	96400000	152299999	Y	gene_id "ENSMUSG00000029279.15"; transcript_id "ba655ee7-2fbf-41eb-afc4-ade0170e86e0_FWD_pA_Ad3p";
chr5	109940246	110009325	chr5	96400000	152299999	Y	gene_id "ENSMUSG00000066613.14"; transcript_id "3b533c94-c849-4eaa-a778-34aad66c9f85_REV_pT_Ad5p_TSO3p";
chr5	115359097	115455698	chr5	96400000	152299999	Y	gene_id "ENSMUSG00000054256.11"; transcript_id "95978a32-4dea-4b97-b1cf-a2a87c6fcc35_REV_pT_Ad5p_TSO3p";
chr5	115359097	115455698	chr5	96400000	152299999	Y	gene_id "ENSMUSG00000054256.11"; transcript_id "d84a14af-014e-4521-8eb1-1021ae5955c8_REV_pT_Ad5p_TSO3p";
chr5	116390678	116422864	chr5	96400000	152299999	Y	gene_id "ENSMUSG00000041548.4"; transcript_id "bd310a92-f2d6-42c8-949a-84796a7f183c_REV_pT_Ad5p_TSO3p";
chr5	120479842	120499033	chr5	96400000	152299999	Y	gene_id "ENSMUSG00000029598.12"; transcript_id "eb4e1744-6104-4adc-91d1-555e56fa0678_REV_pT_Ad5p_TSO3p";
chr5	123907269	123939274	chr5	96400000	152299999	Y	gene_id "ENSMUSG00000023106.15"; transcript_id "0b8c3499-ca90-436a-891a-aa53d6ded255_FWD_pA_Ad3p";
chr5	123907269	123938065	chr5	96400000	152299999	Y	gene_id "ENSMUSG00000023106.15"; transcript_id "c0b50fd0-91c0-4d1d-99df-c5944922b852_FWD_pA_Ad3p";
chr5	123907275	123939274	chr5	96400000	152299999	Y	gene_id "ENSMUSG00000023106.15"; transcript_id "e163136a-84aa-4158-b608-949180ecbeee_REV_pT_Ad5p_TSO3p";
chr5	136908150	136933685	chr5	96400000	152299999	Y	gene_id "ENSMUSG00000007987.12"; transcript_id "38d006cb-f845-4c80-9ac2-396a01f5a953_REV_pT_Ad5p";
chr5	136953275	136975844	chr5	96400000	152299999	Y	gene_id "ENSMUSG00000001739.14"; transcript_id "72b1bed9-c463-4aa9-891d-99b33a80999d_REV_pT_Ad5p_TSO3p";
chr5	137629178	137642902	chr5	96400000	152299999	Y	gene_id "ENSMUSG00000029720.9"; transcript_id "58a62c1d-3923-44ed-b43b-dd8e4a1a4619_FWD_pA_Ad3p_TSO5p";
chr5	142542889	142608800	chr5	96400000	152299999	Y	gene_id "5:142542000"; transcript_id "21624666-a87e-4feb-989b-40b13a706944_REV_pT_Ad5p_TSO3p";
chr5	143909562	143942798	chr5	96400000	152299999	Y	gene_id "ENSMUSG00000079109.11"; transcript_id "2d225234-c20c-4e9c-9297-a12e79e4e7ca_FWD_pA_Ad3p";
chr5	143909990	143942798	chr5	96400000	152299999	Y	gene_id "ENSMUSG00000079109.11"; transcript_id "11c8e4bc-1b28-48b6-b156-65f4d25ed19a_FWD_pA_Ad3p";
chr5	143909990	143937115	chr5	96400000	152299999	Y	gene_id "ENSMUSG00000079109.11"; transcript_id "27471468-c382-4582-9567-32500d50c915_FWD_pA_Ad3p";
chr5	143909990	143942798	chr5	96400000	152299999	Y	gene_id "ENSMUSG00000079109.11"; transcript_id "ce9aa78a-f893-43b7-96f6-fa1242ae2b09_FWD_pA_Ad3p";
chr5	143910025	143937115	chr5	96400000	152299999	Y	gene_id "ENSMUSG00000079109.11"; transcript_id "15bef196-2ea1-4fe7-9ef1-5bb36cab0070_REV_pT_Ad5p_TSO3p";
chr5	143910025	143937115	chr5	96400000	152299999	Y	gene_id "ENSMUSG00000079109.11"; transcript_id "4e61a507-d498-4cf1-8974-5ba4d71fe70c_REV_pT_Ad5p_TSO3p";
chr5	148874335	148995215	chr5	96400000	152299999	Y	gene_id "ENSMUSG00000041298.15"; transcript_id "f0c73936-80c9-4207-8c46-bb46ee8ff72c_REV_pT_Ad5p_TSO3p";
chr6	6455935	6578658	chr6	5800000	6899999	Y	gene_id "6:6455000"; transcript_id "505647ca-ad97-4d5b-98d2-2356faf71dc8_REV_pT_Ad5p_TSO3p";
chr6	24505405	24527526				N	gene_id "ENSMUSG00000023089.12"; transcript_id "fbe2f063-15bf-4fbd-b8c1-0eb1ddf364ed_FWD_pA_Ad3p";
chr6	24518666	24664988				N	gene_id "ENSMUSG00000029684.14"; transcript_id "d338f27a-aaf9-4cdb-bc84-ff5e978b5edf_FWD_pA_Ad3p";
chr6	38533502	38593397	chr6	37800000	39799999	Y	gene_id "ENSMUSG00000029823.16"; transcript_id "f5fdacda-94f1-4ca1-b8dc-e4b39a5d8238_REV_pT_Ad5p";
chr6	38534823	38591355	chr6	37800000	39799999	Y	gene_id "ENSMUSG00000029823.16"; transcript_id "73bb7392-4c9a-4bfc-ad1a-59adc46abb1f_REV_pT_Ad5p_TSO3p";
chr6	49319307	49372634	chr6	48000000	54499999	Y	gene_id "ENSMUSG00000050786.8"; transcript_id "140b96e0-7aa6-4af4-a3f0-c64788bbb3fc_FWD_pA_Ad3p";
chr6	54464723	54566674	chr6	54500000	55499999	N	gene_id "ENSMUSG00000019124.10"; transcript_id "be821d6f-41ea-452e-b6d2-bbd6d9c57d1f_REV_pT_Ad5p-1_TSO3p";
chr6	57689037	57825154	chr6	57600000	57799999	N	gene_id "ENSMUSG00000037788.14"; transcript_id "584b3483-2f26-4196-9397-377ff4e17759_FWD_pA_Ad3p";
chr6	57689037	57825154	chr6	57600000	57799999	N	gene_id "ENSMUSG00000037788.14"; transcript_id "79ca30fb-7b0a-4387-aef1-33355ae3e2d2_FWD_pA_Ad3p";
chr6	81984321	82093099	chr6	81900000	82599999	Y	gene_id "ENSMUSG00000035104.14"; transcript_id "ed92efaa-490c-435a-b207-5dec80127461_FWD_pA_Ad3p";
chr6	83109120	83117473	chr6	82600000	83799999	Y	gene_id "ENSMUSG00000030037.9"; transcript_id "88545fe5-856b-48f8-8365-49e94086088d_REV_pT_Ad5p_TSO3p";
chr6	83761756	83775758	chr6	82600000	83799999	Y	gene_id "ENSMUSG00000014748.13"; transcript_id "062f6bed-c785-4f67-8939-be3565c32bc3_FWD_pA_Ad3p";
chr6	83761756	83775758	chr6	82600000	83799999	Y	gene_id "ENSMUSG00000014748.13"; transcript_id "b20a3ed4-cff8-4cf2-b943-74cb038c677b_REV_pT_Ad5p_TSO3p";
chr6	83761756	83775758	chr6	82600000	83799999	Y	gene_id "ENSMUSG00000014748.13"; transcript_id "ff49a60e-9353-4375-96fa-e09784e42438_FWD_pA_Ad3p";
chr6	85651183	85726814				N	gene_id "ENSMUSG00000063810.7"; transcript_id "d3a318f2-3c68-453e-a9b1-89ad689b5051_FWD_pA_Ad3p_TSO5p";
chr6	85701589	85756641				N	gene_id "6:85701000"; transcript_id "311fbe19-bdce-4330-afa0-895df42d355a_REV_pT_Ad5p_TSO3p";
chr6	87728486	87811779	chr6	87000000	89599999	Y	gene_id "ENSMUSG00000108079.1"; transcript_id "f148b23c-0338-446e-ac27-0c2c777255ea_REV_pT_Ad5p";
chr6	108783099	108855764	chr6	108000000	108899999	Y	gene_id "ENSMUSG00000030104.9"; transcript_id "7a73ac24-2971-48e9-be0e-a88170530dfd_FWD_pA_Ad3p";
chr6	124834247	124857394	chr6	124400000	125299999	Y	gene_id "ENSMUSG00000023439.11"; transcript_id "9c2104fa-a3e2-480d-a09b-298a030679b8_FWD_pA_Ad3p";
chr6	124834247	124870272	chr6	124400000	125299999	Y	gene_id "ENSMUSG00000023439.11"; transcript_id "fad05db7-55d0-45c7-923b-83dfecd8fe4c_FWD_pA_Ad3p";
chr6	128895369	129006647	chr6	129000000	129599999	N	gene_id "6:128895000"; transcript_id "9cbccaf4-1842-44a4-8144-4a12301c9712_FWD_pA_Ad3p_TSO5p";
chr6	146642579	146665012	chr6	144900000	146699999	Y	gene_id "ENSMUSG00000030291.12"; transcript_id "dac81350-46c3-4c14-8844-528461f75d42_FWD_pA_Ad3p";
chr6	146642591	146665012	chr6	144900000	146699999	Y	gene_id "ENSMUSG00000030291.12"; transcript_id "f399bd11-253b-43cb-87e6-ecd9c34a66a8_FWD_pA_Ad3p";
chr6	149409069	149583656	chr6	149400000	149599999	Y	gene_id "ENSMUSG00000003452.15"; transcript_id "60f7ff4c-9ed9-4d6d-b968-0a788987af98_FWD_pA_Ad3p";
chr6	149513084	149583491	chr6	149400000	149599999	Y	gene_id "ENSMUSG00000003452.15"; transcript_id "ff4c233d-696b-47e4-8f3f-88823883d2db_REV_pT_Ad5p_TSO3p";
chr7	3620324	3644577	chr7	3300000	3699999	Y	gene_id "ENSMUSG00000006335.16"; transcript_id "232aed56-eb56-4017-bc5c-9c2ebf5bb252_FWD_pA_Ad3p";
chr7	3620324	3644000	chr7	3300000	3699999	Y	gene_id "ENSMUSG00000006335.16"; transcript_id "bb8dd84a-b04f-4454-b1b5-52a0ce15d929_REV_pT_Ad5p_TSO3p";
chr7	3659501	3701024	chr7	3300000	3699999	N	gene_id "ENSMUSG00000035585.16"; transcript_id "b5f04c85-a749-46a5-90d6-cbe302ddfc95_FWD_pA_Ad3p";
chr7	4009007	4119760	chr7	3900000	4399999	Y	gene_id "ENSMUSG00000055541.17"; transcript_id "8d127e92-a4d8-47d6-91d9-e6086952fccc_FWD_pA_Ad3p";
chr7	4692745	4794562	chr7	4400000	4999999	Y	gene_id "ENSMUSG00000030432.12"; transcript_id "d9d27adf-6bfd-4379-91c5-19f2c87dbccd_FWD_pA_Ad3p_TSO3p";
chr7	6415175	6441691	chr7	5800000	7199999	Y	gene_id "ENSMUSG00000045929.8"; transcript_id "5053d730-a5d4-4d5a-a67f-efb340b6b66e_FWD_pA-1_Ad3p";
chr7	6415175	6441691	chr7	5800000	7199999	Y	gene_id "ENSMUSG00000093536.7"; transcript_id "61ebfa16-c115-4797-b772-350829ce00c3_REV_pT_Ad5p_TSO3p";
chr7	7202117	7234505				N	gene_id "ENSMUSG00000066838.7"; transcript_id "adc1b1cb-07c6-4535-af2b-1edf169cbc85_REV_pT_Ad5p_TSO5p3p";
chr7	7203013	7278267				N	gene_id "ENSMUSG00000110105.1"; transcript_id "190719b0-4668-48bb-a21c-2337113da29b_FWD_pA_Ad3p";
chr7	7240640	7278267				N	gene_id "ENSMUSG00000098900.2"; transcript_id "c8d5bf32-f8f6-42a8-a5b3-4ca774f91d86_FWD_pA_Ad3p";
chr7	7242861	7278267				N	gene_id "ENSMUSG00000110105.1"; transcript_id "0c222042-8285-4272-81c5-37009756405d_REV_pT_Ad5p_TSO3p";
chr7	7243725	7278267				N	gene_id "ENSMUSG00000098900.2"; transcript_id "c1879886-d47b-4855-a4ef-b1fbe319c996_FWD_pA_Ad3p";
chr7	7243728	7269708				N	gene_id "ENSMUSG00000098900.2"; transcript_id "e6a940e3-1b1a-4313-a2d0-20b7d0518add_REV_pT_Ad5p_TSO3p";
chr7	12897841	12926686	chr7	12600000	12899999	N	gene_id "ENSMUSG00000012848.15"; transcript_id "4fdbc4f5-9454-4880-89ca-115c62158037_FWD_pA_Ad3p";
chr7	12897841	12926686	chr7	12600000	12899999	N	gene_id "ENSMUSG00000012848.15"; transcript_id "7684eb7c-8c8a-47ca-bf71-5c85512fda78_REV_pT_Ad5p_TSO3p";
chr7	12922318	12929983	chr7	12900000	13099999	Y	gene_id "ENSMUSG00000012848.15"; transcript_id "19cc846a-6905-4233-b196-794953d31239_FWD_pA_Ad3p_TSO5p3p";
chr7	13032014	13037746	chr7	12900000	13099999	Y	gene_id "ENSMUSG00000033916.5"; transcript_id "4606a13a-d741-41d9-9d87-3151915c35aa_REV_pT_Ad5p_TSO3p";
chr7	13032014	13037627	chr7	12900000	13099999	Y	gene_id "ENSMUSG00000033916.5"; transcript_id "5494130b-dba0-45b0-a1d8-94629207d633_FWD_pA_Ad3p";
chr7	13398132	13473449	chr7	13300000	13699999	Y	gene_id "ENSMUSG00000005649.17"; transcript_id "0842873d-5695-4208-9826-293158c937a9_REV_pT_Ad5p_TSO3p";
chr7	13398132	13473449	chr7	13300000	13699999	Y	gene_id "ENSMUSG00000005649.17"; transcript_id "36103b23-ae9a-481d-83f0-b660ec388da0_REV_pT_Ad5p_TSO3p";
chr7	15833241	15879872	chr7	15800000	15999999	Y	gene_id "ENSMUSG00000041583.8"; transcript_id "4e2a8179-8881-4898-8bb2-76dd68a7e357_FWD_pA_Ad3p";
chr7	16564561	16619832	chr7	16400000	17599999	Y	gene_id "7:16564000"; transcript_id "f51c93c2-6d7a-468d-9106-4fff1e501073_REV_pT_Ad5p_TSO3p";
chr7	24081924	24118357	chr7	23900000	24099999	N	gene_id "ENSMUSG00000057101.8"; transcript_id "5dae5e21-ca74-4cbd-8ae4-262992810cf2_REV_pT_Ad5p_TSO3p";
chr7	24081924	24124969	chr7	23900000	24099999	N	gene_id "ENSMUSG00000057101.8"; transcript_id "de3d40f4-3212-4065-999b-437077dcd8e9_REV_pT_Ad5p_TSO3p";
chr7	25630262	25670601	chr7	24900000	26599999	Y	gene_id "ENSMUSG00000060376.7"; transcript_id "575468c9-d0dd-4614-a599-0b9f052c1a71_FWD_pA_Ad3p";
chr7	25630262	25673473	chr7	24900000	26599999	Y	gene_id "ENSMUSG00000060376.7"; transcript_id "f1e796ce-bd46-4b2f-941d-9bb2e4916036_REV_pT_Ad5p_TSO3p";
chr7	27158658	27178896	chr7	27000000	27199999	Y	gene_id "ENSMUSG00000053291.15"; transcript_id "25891a8d-caec-4e84-93cd-c5fe2380fa6b_REV_pT_Ad5p_TSO3p";
chr7	27731389	27771933	chr7	27600000	27799999	Y	gene_id "ENSMUSG00000037640.15"; transcript_id "7ecd6d83-dd04-45dc-9516-1660b2ecb7f4_FWD_pA_Ad3p";
chr7	27731389	27770630	chr7	27600000	27799999	Y	gene_id "ENSMUSG00000037640.15"; transcript_id "7f43176e-10b7-41c4-931b-35b3479f4e64_FWD_pA_Ad3p";
chr7	27911996	27973842				N	gene_id "ENSMUSG00000063047.9"; transcript_id "58b636fa-732a-4d50-a889-c205933191a1_FWD_pA_Ad3p";
chr7	28825217	28841708	chr7	28000000	31499999	Y	gene_id "ENSMUSG00000053964.17"; transcript_id "06c3876c-ebd9-4c25-969e-d895a083f898_REV_pT_Ad5p_TSO3p";
chr7	28825349	28841708	chr7	28000000	31499999	Y	gene_id "ENSMUSG00000053898.12"; transcript_id "2d053c30-1716-41e1-86dc-df6a2b53fd62_FWD_pA_Ad3p";
chr7	29247572	29281586	chr7	28000000	31499999	Y	gene_id "ENSMUSG00000074227.12"; transcript_id "316972ac-f457-4646-99a9-19684f648baf_REV_pT_Ad5p";
chr7	29247572	29281910	chr7	28000000	31499999	Y	gene_id "ENSMUSG00000074227.12"; transcript_id "4ea31009-5373-4c1d-829c-e5ba30907404_FWD_pA_Ad3p";
chr7	29247572	29281910	chr7	28000000	31499999	Y	gene_id "ENSMUSG00000074227.12"; transcript_id "6b6b5d4e-7953-47c0-89b1-2cf4921fa526_REV_pT_Ad5p_TSO3p";
chr7	30308777	30319046	chr7	28000000	31499999	Y	gene_id "ENSMUSG00000019737.14"; transcript_id "0e07974a-bb03-45f9-98a6-feaa3f6242b5_FWD_pA_Ad3p";
chr7	30308777	30319046	chr7	28000000	31499999	Y	gene_id "ENSMUSG00000042831.13"; transcript_id "b69a68ca-1d9c-4a2f-8826-7b4f07d0fff6_REV_pT_Ad5p_TSO3p";
chr7	30308809	30319046	chr7	28000000	31499999	Y	gene_id "ENSMUSG00000042831.13"; transcript_id "c028b68d-3e8a-4408-9e05-7c780d27427e_REV_pT_Ad5p_TSO3p";
chr7	30555445	30562931	chr7	28000000	31499999	Y	gene_id "ENSMUSG00000036845.12"; transcript_id "218af35b-c8fd-4862-aa29-f34024742ce7_FWD_pA_Ad3p_TSO5p";
chr7	30641001	30654201	chr7	28000000	31499999	Y	gene_id "ENSMUSG00000036733.16"; transcript_id "b2fe5b72-b3d7-441e-aca9-aecaf0e042c7_REV_pT_Ad5p_TSO3p";
chr7	30729579	30756134	chr7	28000000	31499999	Y	gene_id "ENSMUSG00000109224.1"; transcript_id "1124bb75-cd28-44f8-b1d1-60422e13916c_FWD_pA_Ad3p";
chr7	30729579	30756134	chr7	28000000	31499999	Y	gene_id "ENSMUSG00000097320.8"; transcript_id "8e34a86d-ba2b-491a-bd4e-3190f02a8af5_REV_pT_Ad5p_TSO3p";
chr7	30729579	30756134	chr7	28000000	31499999	Y	gene_id "ENSMUSG00000109224.1"; transcript_id "aa2e67db-e943-4939-8b62-08c609d5b4dd_REV_pT_Ad5p_TSO3p";
chr7	30922389	30942915	chr7	28000000	31499999	Y	gene_id "7:30922000"; transcript_id "5d59428a-0ee6-4347-88f7-6f5a83732cba_REV_pT_Ad5p";
chr7	31032730	31051403	chr7	28000000	31499999	Y	gene_id "ENSMUSG00000009687.14"; transcript_id "b745654e-113e-4aa9-834a-bc5361b4c2db_FWD_pA_Ad3p";
chr7	31042513	31054788	chr7	28000000	31499999	Y	gene_id "ENSMUSG00000036578.7"; transcript_id "29b95726-164b-47e0-9ffb-28809690fcca_REV_pT_Ad5p_TSO3p";
chr7	31042513	31054788	chr7	28000000	31499999	Y	gene_id "ENSMUSG00000036570.14"; transcript_id "9ea0603a-1291-441f-b454-65834ca2090f_FWD_pA_Ad3p";
chr7	31042513	31055667	chr7	28000000	31499999	Y	gene_id "ENSMUSG00000036570.14"; transcript_id "c9071420-90d4-4dc5-a3e7-e356bb9b0e61_REV_pT_Ad5p_TSO3p";
chr7	31042513	31052193	chr7	28000000	31499999	Y	gene_id "ENSMUSG00000036578.7"; transcript_id "cd9eda25-612d-4934-b769-c1f97c051bb7_FWD_pA_Ad3p";
chr7	31042513	31055667	chr7	28000000	31499999	Y	gene_id "ENSMUSG00000036570.14"; transcript_id "d307413e-aa66-4a50-933c-ffb90b93e600_FWD_pA_Ad3p";
chr7	43177623	43225887				N	gene_id "ENSMUSG00000074887.4"; transcript_id "9f1508e2-ac9f-4895-9545-6345c472f655_REV_pT_Ad5p_TSO3p";
chr7	43562256	43591537				N	gene_id "ENSMUSG00000056592.14"; transcript_id "02800ce8-8fc6-479a-98ee-8412e7c547fd_REV_pT_Ad5p_TSO5p";
chr7	44863068	44883022				N	gene_id "ENSMUSG00000038502.17"; transcript_id "45eaceb0-c389-458c-bcf1-35146c3cd956_REV_pT_Ad5p_TSO5p3p";
chr7	44863068	44883022				N	gene_id "ENSMUSG00000038502.17"; transcript_id "52bb582d-5b41-43c1-bc28-3edfac54ff15_FWD_pA_Ad3p";
chr7	44863068	44882817				N	gene_id "ENSMUSG00000038502.17"; transcript_id "5f1130e7-a918-4390-8b7d-6eb854950c5d_REV_pT_Ad5p_TSO3p";
chr7	44863068	44884139				N	gene_id "ENSMUSG00000038502.17"; transcript_id "716b2550-456e-4a8e-bdb8-391e78800974_REV_pT_Ad5p_TSO3p";
chr7	45125558	45132281				N	gene_id "ENSMUSG00000074129.14"; transcript_id "07d603f8-fce4-4d44-8253-50ebf6745e97_FWD_pA_Ad3p_TSO3p";
chr7	45125922	45133909				N	gene_id "ENSMUSG00000089989.10"; transcript_id "343bd596-f270-4200-99e7-dd197e3ecead_FWD_pA_Ad3p";
chr7	45125922	45177176				N	gene_id "ENSMUSG00000089989.10"; transcript_id "9290b4f6-f744-4f30-9314-f119d303dea3_REV_pT_Ad5p_TSO3p";
chr7	45125922	45144567				N	gene_id "ENSMUSG00000089989.10"; transcript_id "96b09732-d7da-4d19-8f51-71c651f702e8_FWD_pA_Ad3p";
chr7	45570350	45599569				N	gene_id "ENSMUSG00000030826.19"; transcript_id "1caec0ff-e596-41cd-855c-3219b15a440a_FWD_pA_Ad3p";
chr7	45702432	45710028				N	gene_id "ENSMUSG00000003273.14"; transcript_id "05c05243-c944-45b4-9bdc-71e0bcaa8575_REV_pT_Ad5p";
chr7	45807609	45824782				N	gene_id "ENSMUSG00000003269.17"; transcript_id "978630e7-9757-4ec2-8358-5f05c05b0dab_FWD_pA_Ad3p";
chr7	59969577	60005064	chr7	59900000	60099999	Y	gene_id "ENSMUSG00000102627.1"; transcript_id "1ede3695-eed7-4d88-8374-f4b0166d09f4_FWD_pA_Ad3p";
chr7	65326382	65635913	chr7	65300000	65499999	N	gene_id "ENSMUSG00000030516.14"; transcript_id "5050d9b6-7a1d-4fec-9b7d-619f8ba444f9_FWD_pA_Ad3p";
chr7	70272500	70366200	chr7	70200000	70399999	Y	gene_id "ENSMUSG00000109097.1"; transcript_id "0b49d610-3fbd-42da-acee-4c35613599cf_FWD_pA_Ad3p";
chr7	78775341	78847263	chr7	76000000	79399999	Y	gene_id "ENSMUSG00000030612.6"; transcript_id "e198316e-f152-439a-b4f0-8a69ec211631_FWD_pA_Ad3p";
chr7	78895951	78920396	chr7	76000000	79399999	Y	gene_id "ENSMUSG00000039236.18"; transcript_id "168ef004-fcb4-4209-a0bc-77fbee8f3620_REV_pT_Ad5p";
chr7	78895951	78920396	chr7	76000000	79399999	Y	gene_id "ENSMUSG00000030609.18"; transcript_id "e99e8bcd-b56f-44ff-8f15-812f79885ab6_FWD_pA_Ad3p";
chr7	80902227	80947545	chr7	80800000	80999999	Y	gene_id "ENSMUSG00000025724.12"; transcript_id "0e9af04e-1a47-45e4-9ce4-5cae7b585d45_REV_pT_Ad5p_TSO3p";
chr7	80902227	80947545	chr7	80800000	80999999	Y	gene_id "ENSMUSG00000025724.12"; transcript_id "2dc6a8ec-6200-43e7-955c-e42ad9bab226_REV_pT_Ad5p_TSO3p";
chr7	80902234	80947545	chr7	80800000	80999999	Y	gene_id "ENSMUSG00000025724.12"; transcript_id "060933bf-45a3-4f02-8b0a-69898cbfc3c4_FWD_pA_Ad3p";
chr7	80902234	80947545	chr7	80800000	80999999	Y	gene_id "ENSMUSG00000025724.12"; transcript_id "106e4195-e7c0-464a-a2f0-17158f670ea2_REV_pT_Ad5p_TSO3p";
chr7	81763050	81884071	chr7	81800000	81999999	N	gene_id "ENSMUSG00000038623.9"; transcript_id "d762c762-c20a-4e96-9b62-4c96d3a7b740_FWD_pA_Ad3p_TSO5p";
chr7	89866148	89941163	chr7	89700000	90999999	Y	gene_id "ENSMUSG00000039391.11"; transcript_id "57369a86-2bba-4c59-a9b0-d9c34e7935fc_REV_pT_Ad5p_TSO3p";
chr7	89892767	89941163	chr7	89700000	90999999	Y	gene_id "ENSMUSG00000062797.14"; transcript_id "796ae129-a8a7-43d5-8481-476b4c0b4c26_REV_pT_Ad5p_TSO3p";
chr7	102014508	102065117	chr7	102000000	102199999	Y	gene_id "7:102014000"; transcript_id "0a392bbe-16d3-4902-8997-f6d285c4bd8f_REV_pT_Ad5p_TSO5p3p";
chr7	102210372	102238560	chr7	102200000	102399999	Y	gene_id "7:102210000"; transcript_id "63920a00-6c8e-48bc-a281-ccaabe385205_REV_pT_Ad5p_TSO3p";
chr7	103812524	103827928	chr7	103600000	103899999	Y	gene_id "ENSMUSG00000052305.6"; transcript_id "48c1e94a-9f7b-4c0a-9584-148f3f23079f_REV_pT_Ad5p_TSO3p";
chr7	103812524	103827928	chr7	103600000	103899999	Y	gene_id "ENSMUSG00000073940.3"; transcript_id "c547bf4d-6ac3-4f41-8f73-91c30240add7_FWD_pA_Ad3p";
chr7	103826534	103852805	chr7	103600000	103899999	Y	gene_id "7:103826000"; transcript_id "4658ca51-320b-416f-8b97-f0d301ba64b3_FWD_pA_Ad3p_TSO5p";
chr7	105591613	105611657	chr7	105200000	109299999	Y	gene_id "ENSMUSG00000030895.9"; transcript_id "726f39f3-819a-4ceb-8d0c-42d4ab6999ac_FWD_pA_Ad3p";
chr7	105640567	105669514	chr7	105200000	109299999	Y	gene_id "ENSMUSG00000110234.2"; transcript_id "9cbbfba9-5015-4c65-9930-383c11b331ef_FWD_pA-1_Ad3p";
chr7	105732207	105743943	chr7	105200000	109299999	Y	gene_id "ENSMUSG00000030888.14"; transcript_id "ef056f45-b4fd-4587-b5c4-10db0167d7b7_REV_pT_Ad5p_TSO3p";
chr7	118120300	118141419	chr7	116700000	120799999	Y	gene_id "ENSMUSG00000030654.9"; transcript_id "f5fec7af-372a-4c9d-af43-f016884bda63_REV_pT_Ad5p_TSO3p";
chr7	123031374	123170904	chr7	123000000	123199999	Y	gene_id "ENSMUSG00000052707.8"; transcript_id "23e6ee3d-20be-4859-b040-6c29bc2f9942_FWD_pA_Ad3p";
chr7	123031374	123170904	chr7	123000000	123199999	Y	gene_id "ENSMUSG00000052707.8"; transcript_id "e61d1b3b-a604-478f-932f-d0718bf9dc74_REV_pT_Ad5p_TSO3p";
chr7	126795234	126809108	chr7	126600000	126799999	N	gene_id "ENSMUSG00000030695.16"; transcript_id "2b922b8e-5c25-4f98-b80e-1158cb33853d_REV_pT_Ad5p";
chr7	126795234	126809108	chr7	126600000	126799999	N	gene_id "ENSMUSG00000030695.16"; transcript_id "d5a6f93e-d49e-4754-80d2-aa2e8f236f7d_REV_pT_Ad5p_TSO3p";
chr7	126879407	126897236	chr7	126800000	127399999	Y	gene_id "ENSMUSG00000060538.14"; transcript_id "0140983c-c400-435d-87e7-021088826fff_REV_pT_Ad5p_TSO3p";
chr7	126880534	126897236	chr7	126800000	127399999	Y	gene_id "ENSMUSG00000060538.14"; transcript_id "d0a4a441-acd9-46b9-ba62-82c9d295d671_FWD_pA_Ad3p";
chr7	127015065	127021137	chr7	126800000	127399999	Y	gene_id "ENSMUSG00000107068.1"; transcript_id "98a86c33-eefa-4f51-a382-5374c2c4cf36_REV_pT_Ad5p_TSO3p";
chr7	127015065	127021137	chr7	126800000	127399999	Y	gene_id "ENSMUSG00000107068.1"; transcript_id "fd4d4244-0f0d-4521-bd14-2d3fbcc15794_FWD_pA_Ad3p";
chr7	127560326	127565270				N	gene_id "ENSMUSG00000107023.2"; transcript_id "3afb058d-dbad-4c6c-9a89-1d60018b28e2_REV_pT_Ad5p_TSO3p";
chr7	131343186	131410495	chr7	131200000	131399999	N	gene_id "ENSMUSG00000040177.10"; transcript_id "68caa91b-2ef9-44cf-aa2a-07fe8b83c95a_FWD_pA-1_Ad3p";
chr7	131371156	131444763	chr7	131200000	131399999	N	gene_id "ENSMUSG00000030861.15"; transcript_id "17790845-97be-43bb-b2aa-e0473efa76a9_FWD_pA_Ad3p";
chr7	131371156	131445152	chr7	131200000	131399999	N	gene_id "ENSMUSG00000030861.15"; transcript_id "c239be7f-b306-4123-adfa-ca2ed6ae94d5_REV_pT_Ad5p_TSO3p";
chr7	138835823	138909506	chr7	138600000	145999999	Y	gene_id "ENSMUSG00000078566.8"; transcript_id "a19f65cd-82cb-4ffd-bd27-b969eebb55d1_REV_pT_Ad5p_TSO3p";
chr7	140069880	140102344	chr7	138600000	145999999	Y	gene_id "ENSMUSG00000025468.15"; transcript_id "812b19b5-7593-42dc-9432-a9eb7dcd02bf_FWD_pA_Ad3p";
chr7	140069880	140102344	chr7	138600000	145999999	Y	gene_id "ENSMUSG00000025468.15"; transcript_id "c8c78590-9196-44e9-840a-192f8be98cd4_REV_pT_Ad5p_TSO3p";
chr7	140069887	140102344	chr7	138600000	145999999	Y	gene_id "ENSMUSG00000025468.15"; transcript_id "51f6a037-0746-4d67-b1a0-46a1ae80b3b5_REV_pT_Ad5p_TSO3p";
chr7	140069887	140102344	chr7	138600000	145999999	Y	gene_id "ENSMUSG00000025468.15"; transcript_id "72ba076d-d2af-40ed-b377-7ed21df9c828_FWD_pA_Ad3p";
chr7	140069887	140102344	chr7	138600000	145999999	Y	gene_id "ENSMUSG00000025468.15"; transcript_id "793ee44b-7004-438b-a003-e0f02356aef8_REV_pT_Ad5p_TSO3p";
chr7	140069887	140102344	chr7	138600000	145999999	Y	gene_id "ENSMUSG00000025468.15"; transcript_id "b178c39e-53cf-448b-8959-ecc377b0033d_FWD_pA_Ad3p";
chr7	140099470	140116422	chr7	138600000	145999999	Y	gene_id "ENSMUSG00000025465.13"; transcript_id "78ba46d4-047d-42a9-b991-c464b880d00e_FWD_pA_Ad3p";
chr7	140099470	140116422	chr7	138600000	145999999	Y	gene_id "ENSMUSG00000025466.19"; transcript_id "dc5400a8-ba03-4ecf-995c-bd50afff9c88_FWD_pA_Ad3p";
chr7	140099470	140116422	chr7	138600000	145999999	Y	gene_id "ENSMUSG00000025465.13"; transcript_id "ef359831-86fd-4463-8ec9-4da88b9c710e_FWD_pA_Ad3p";
chr7	142505522	142540737	chr7	138600000	145999999	Y	gene_id "ENSMUSG00000037772.13"; transcript_id "11afb265-eeaf-4aac-bebf-125c87cd4edd_FWD_pA_Ad3p";
chr8	3641044	3659817	chr8	3100000	3699999	Y	gene_id "ENSMUSG00000012705.16"; transcript_id "6057a692-b898-42eb-9d4b-bd4cd540df26_REV_pT_Ad5p_TSO3p";
chr8	3641044	3659817	chr8	3100000	3699999	Y	gene_id "ENSMUSG00000012705.16"; transcript_id "887c85a7-5bd2-49c0-9d94-32ccf4c54407_FWD_pA_Ad3p";
chr8	3641044	3659817	chr8	3100000	3699999	Y	gene_id "ENSMUSG00000012705.16"; transcript_id "cd42993f-5f31-4ad3-a4e0-076bd9e34f7f_REV_pT_Ad5p_TSO3p";
chr8	3641402	3659817	chr8	3100000	3699999	Y	gene_id "ENSMUSG00000012705.16"; transcript_id "0f99c598-8f5a-4c1d-aa1e-8c980650f570_FWD_pA_Ad3p";
chr8	3641402	3658234	chr8	3100000	3699999	Y	gene_id "ENSMUSG00000012705.16"; transcript_id "2a059cac-320a-413e-9868-a4c8c81e7104_FWD_pA_Ad3p";
chr8	3641404	3659817	chr8	3100000	3699999	Y	gene_id "ENSMUSG00000012705.16"; transcript_id "c9b48695-9e00-461b-bdbc-1152dbb8dac5_REV_pT_Ad5p_TSO3p";
chr8	3671188	3677318	chr8	3100000	3699999	Y	gene_id "8:3671000"; transcript_id "65fd8c1d-7192-45d5-81d9-fb31e464e151_REV_pT_Ad5p_TSO3p";
chr8	4238829	4251423	chr8	4100000	4699999	Y	gene_id "ENSMUSG00000089736.2"; transcript_id "985e9251-d974-4b58-bdd1-eb67c1dc901a_REV_pT_Ad5p_TSO3p";
chr8	4238829	4251423	chr8	4100000	4699999	Y	gene_id "ENSMUSG00000089736.2"; transcript_id "f37e70f8-9671-480e-aa8f-5d744346bd28_FWD_pA_Ad3p";
chr8	4238829	4251423	chr8	4100000	4699999	Y	gene_id "ENSMUSG00000002948.19"; transcript_id "f67b8217-5a4f-41ce-bc41-24b90fb248b1_FWD_pA_Ad3p";
chr8	4257660	4267340	chr8	4100000	4699999	Y	gene_id "ENSMUSG00000002949.15"; transcript_id "14f41351-5a06-4fb8-9e39-7c2b1d6f0a64_REV_pT_Ad5p";
chr8	4257660	4266864	chr8	4100000	4699999	Y	gene_id "ENSMUSG00000002949.15"; transcript_id "5aa47d7d-a100-4bca-b48b-eab27bd8a4c2_FWD_pA_Ad3p";
chr8	13405081	13469408	chr8	12700000	13899999	Y	gene_id "ENSMUSG00000038457.17"; transcript_id "efbf9fc9-3047-4c53-a88b-383ee89e694f_FWD_pA_Ad3p";
chr8	22577086	22653418	chr8	22500000	22699999	Y	gene_id "ENSMUSG00000008892.12"; transcript_id "1c43bc39-6231-4502-bc57-3c6547be9a96_FWD_pA_Ad3p";
chr8	25745493	25785198	chr8	25600000	25799999	Y	gene_id "ENSMUSG00000061313.8"; transcript_id "5a3a6fd1-c691-4488-b797-e2d9d27ecb50_REV_pT_Ad5p_TSO3p";
chr8	46152610	46170542	chr8	46000000	46199999	Y	gene_id "ENSMUSG00000086279.1"; transcript_id "09e1405f-8ac7-4315-a6aa-8dd43a9d513b_FWD_pA_Ad3p";
chr8	69562911	69625548	chr8	69500000	69699999	Y	gene_id "ENSMUSG00000060427.15"; transcript_id "e3528edb-d8e7-4771-bdb3-95ca4fa9f017_REV_pT_Ad5p_TSO3p";
chr8	69570203	69625548	chr8	69500000	69699999	Y	gene_id "ENSMUSG00000060427.15"; transcript_id "a1f9d835-de89-46de-ae84-bd1297ddc85c_FWD_pA_Ad3p";
chr8	69705137	69774911	chr8	69700000	69899999	Y	gene_id "ENSMUSG00000054648.8"; transcript_id "ef8b408b-69c6-445f-aa28-816a0a0eebf9_FWD_pA_Ad3p";
chr8	69887788	69901657	chr8	69700000	69899999	N	gene_id "ENSMUSG00000048967.16"; transcript_id "27bc7ee7-e622-43f6-adf8-21bf7f50bbae_FWD_pA_Ad3p_TSO5p";
chr8	69887788	69901657	chr8	69700000	69899999	N	gene_id "ENSMUSG00000048967.16"; transcript_id "ab670e6c-9e5a-453f-957b-bfca1f136724_REV_pT_Ad5p_TSO3p";
chr8	71592184	71607924	chr8	71600000	71799999	N	gene_id "ENSMUSG00000043243.15"; transcript_id "2b06631e-6e59-4f19-95a4-0d8f93fade07_FWD_pA_Ad3p";
chr8	71592184	71607924	chr8	71600000	71799999	N	gene_id "ENSMUSG00000043243.15"; transcript_id "fde49418-bfe4-49b4-a06d-019fc06c717e_FWD_pA_Ad3p";
chr8	84815404	84840641	chr8	79200000	96599999	Y	gene_id "ENSMUSG00000003813.15"; transcript_id "5e3ec73d-8a0e-442f-bd17-18ecd52de868_FWD_pA_Ad3p";
chr8	84815404	84840641	chr8	79200000	96599999	Y	gene_id "ENSMUSG00000003813.15"; transcript_id "995a7766-51b8-4523-bf93-6ffacecdbf9c_FWD_pA_Ad3p";
chr8	84815404	84840641	chr8	79200000	96599999	Y	gene_id "ENSMUSG00000003813.15"; transcript_id "a30f8292-c190-428b-b739-1e2783e40cab_REV_pT_Ad5p";
chr8	84815404	84840641	chr8	79200000	96599999	Y	gene_id "ENSMUSG00000003813.15"; transcript_id "bce28811-a3ef-46a8-9c27-68f775b9acf0_FWD_pA_Ad3p";
chr8	84815404	84840641	chr8	79200000	96599999	Y	gene_id "ENSMUSG00000003813.15"; transcript_id "cdf8d25c-28c9-430b-ae73-15a7584c93ae_FWD_pA_Ad3p";
chr8	84816005	84840641	chr8	79200000	96599999	Y	gene_id "ENSMUSG00000003813.15"; transcript_id "ea9a8b4e-ede1-453e-b56b-1eb1bfeb6802_FWD_pA_Ad3p";
chr8	85071757	85082028	chr8	79200000	96599999	Y	gene_id "ENSMUSG00000060038.14"; transcript_id "7528e80b-0091-4ef4-a4e8-5fd99a33974a_FWD_pA_Ad3p";
chr8	93513707	93627784	chr8	79200000	96599999	Y	gene_id "ENSMUSG00000058019.13"; transcript_id "0753e11d-42dd-4246-95b6-eeebf6bfe88b_FWD_pA_Ad3p";
chr8	93513707	93627784	chr8	79200000	96599999	Y	gene_id "ENSMUSG00000058019.13"; transcript_id "113d7a1f-7f14-4439-9e9d-b7da145206da_REV_pT_Ad5p_TSO3p";
chr8	93513707	93627784	chr8	79200000	96599999	Y	gene_id "ENSMUSG00000058019.13"; transcript_id "c1ed1b89-6095-41c1-8add-771dab8877c4_FWD_pA_Ad3p";
chr8	93513707	93627784	chr8	79200000	96599999	Y	gene_id "ENSMUSG00000058019.13"; transcript_id "e80d583c-f19f-42ee-ba79-f5d346dd82c4_REV_pT_Ad5p";
chr8	94772204	94812036	chr8	79200000	96599999	Y	gene_id "ENSMUSG00000031780.2"; transcript_id "bfa69527-8fda-4b8f-9efb-ba430f93832b_REV_pT_Ad5p_TSO3p";
chr8	94772204	94812036	chr8	79200000	96599999	Y	gene_id "ENSMUSG00000031780.2"; transcript_id "c4f5ad2c-b7ef-4bf1-af1f-bf1e8e0310d1_FWD_pA_Ad3p";
chr8	104628070	104641701				N	gene_id "ENSMUSG00000031880.7"; transcript_id "0274c55e-b73e-4bf1-a38e-29fe5ea7fbc0_FWD_pA_Ad3p";
chr8	104628070	104641701				N	gene_id "ENSMUSG00000031879.14"; transcript_id "94afa474-5955-4ddd-937b-e3a71568ff24_FWD_pA_Ad3p";
chr8	105467493	105473510				N	gene_id "ENSMUSG00000014846.12"; transcript_id "c650c79b-1df2-4e9a-a224-839c3c571cc0_REV_pT_Ad5p_TSO3p";
chr8	105482565	105566047				N	gene_id "ENSMUSG00000039199.6"; transcript_id "254acc51-4a5a-4f24-8a64-b96e584e389c_FWD_pA_Ad3p";
chr8	105482565	105566047				N	gene_id "ENSMUSG00000013160.7"; transcript_id "5173faf3-573a-4902-9dde-8a2fe72defff_FWD_pA_Ad3p_TSO5p";
chr8	105524465	105567216				N	gene_id "ENSMUSG00000013160.7"; transcript_id "177985cd-9083-4ad1-bfa3-a1adace2bb9a_REV_pT_Ad5p_TSO3p";
chr8	105524465	105637485	chr8	105600000	105799999	N	gene_id "ENSMUSG00000013160.7"; transcript_id "699e5b5f-e17c-4e69-a03e-7f52be3ea656_FWD_pA_Ad3p";
chr8	110980473	111021097	chr8	110300000	111999999	Y	gene_id "ENSMUSG00000015023.7"; transcript_id "198dfe68-fac8-47ee-9fad-a9d2f8640d72_FWD_pA_Ad3p";
chr8	111768491	111876750	chr8	110300000	111999999	Y	gene_id "ENSMUSG00000031954.6"; transcript_id "bc919dbe-4a8c-4880-9852-aed7699b7e9d_REV_pT_Ad5p_TSO3p";
chr8	123224842	123242640	chr8	123200000	124099999	Y	gene_id "ENSMUSG00000033862.7"; transcript_id "02532bd0-70c6-4cd0-8e2e-feafab9de576_FWD_pA-1_Ad3p";
chr8	123224842	123242359	chr8	123200000	124099999	Y	gene_id "ENSMUSG00000033862.7"; transcript_id "246821a5-2243-451b-ab23-888750307190_FWD_pA_Ad3p";
chr8	123224842	123242359	chr8	123200000	124099999	Y	gene_id "ENSMUSG00000033862.7"; transcript_id "3faf89e2-f078-4cbc-805b-d310b6329e5b_FWD_pA_Ad3p";
chr8	123224842	123242359	chr8	123200000	124099999	Y	gene_id "ENSMUSG00000033862.7"; transcript_id "a4dc9137-58bb-4826-bc47-69d30334fead_FWD_pA_Ad3p";
chr8	123224854	123242640	chr8	123200000	124099999	Y	gene_id "ENSMUSG00000033862.7"; transcript_id "5b399525-5712-4bf8-9390-20e840dc86ed_FWD_pA_Ad3p_TSO5p";
chr8	123226346	123242359	chr8	123200000	124099999	Y	gene_id "ENSMUSG00000033862.7"; transcript_id "9008020c-c5b8-4d78-ac54-8d4833bda967_FWD_pA_Ad3p";
chr9	4309559	4386870	chr9	4300000	4499999	Y	gene_id "ENSMUSG00000041124.11"; transcript_id "e9e4c6d6-ca75-4d36-97da-f50523c3c790_REV_pT_Ad5p_TSO3p";
chr9	4309835	4386870	chr9	4300000	4499999	Y	gene_id "ENSMUSG00000041124.11"; transcript_id "31f1fa7e-9ea0-4837-86e3-1b1699afb1ad_FWD_pA_Ad3p";
chr9	20873808	20937189	chr9	20300000	22199999	Y	gene_id "ENSMUSG00000038742.7"; transcript_id "67d55af2-d3f2-40fa-8462-38a1d9e53b4d_REV_pT_Ad5p_TSO3p";
chr9	21989871	22052023	chr9	20300000	22199999	Y	gene_id "ENSMUSG00000039632.13"; transcript_id "dc2b70b5-51c1-4813-baf8-9dade7cf7b08_REV_pT_Ad5p_TSO3p";
chr9	35559466	35612251	chr9	35400000	35599999	N	gene_id "ENSMUSG00000032103.10"; transcript_id "08f24383-5c6a-4919-9d2b-c674c3e8dae2_FWD_pA_Ad3p";
chr9	44799397	44809783	chr9	41800000	72999999	Y	gene_id "ENSMUSG00000039438.7"; transcript_id "8fe85676-42db-4b52-ad6b-ab5765e7b2d4_FWD_pA_Ad3p";
chr9	44847876	44920707	chr9	41800000	72999999	Y	gene_id "ENSMUSG00000002028.13"; transcript_id "1173edc4-c161-4e8d-927c-20a84cf9a737_REV_pT_Ad5p_TSO3p";
chr9	48468512	48495294	chr9	41800000	72999999	Y	gene_id "ENSMUSG00000032026.7"; transcript_id "3a034c64-2d8a-4f77-8114-aecd3d3ec56f_FWD_pA_Ad3p";
chr9	48468512	48495294	chr9	41800000	72999999	Y	gene_id "ENSMUSG00000032026.7"; transcript_id "8ac555fd-96bc-4019-a6d8-4c90ed9aa232_FWD_pA-1_Ad3p";
chr9	48468512	48495294	chr9	41800000	72999999	Y	gene_id "ENSMUSG00000032026.7"; transcript_id "f2f17b28-f7e8-4be9-85d3-bc0bf36a6e13_FWD_pA_Ad3p";
chr9	48468716	48495294	chr9	41800000	72999999	Y	gene_id "ENSMUSG00000042396.10"; transcript_id "a45edc84-dc58-4244-9044-ee46adb77845_REV_pT_Ad5p_TSO3p";
chr9	50739691	50752354	chr9	41800000	72999999	Y	gene_id "ENSMUSG00000032062.3"; transcript_id "e8d76036-21bc-4603-9c53-04a128082876_FWD_pA_Ad3p";
chr9	55938252	56059077	chr9	41800000	72999999	Y	gene_id "ENSMUSG00000032320.7"; transcript_id "1c84b14a-5feb-4585-aefa-ae9c3e308925_REV_pT_Ad5p-1_TSO3p";
chr9	55938252	56059077	chr9	41800000	72999999	Y	gene_id "ENSMUSG00000032320.7"; transcript_id "e51d1bb4-e6d6-4441-8c99-bb3860dfb8e6_FWD_pA-1_Ad3p";
chr9	57412653	57467996	chr9	41800000	72999999	Y	gene_id "ENSMUSG00000063849.6"; transcript_id "5c9eee4f-b021-466d-89c6-c487e3993bb9_REV_pT_Ad5p_TSO3p";
chr9	57413961	57467996	chr9	41800000	72999999	Y	gene_id "ENSMUSG00000063849.6"; transcript_id "a074fdea-3da1-4f65-b428-1443108c70ce_FWD_pA_Ad3p";
chr9	57601378	57609286	chr9	41800000	72999999	Y	gene_id "9:57601000"; transcript_id "212a4fc4-b76b-4392-9552-f42abb75335d_REV_pT_Ad5p_TSO3p";
chr9	59656576	59717757	chr9	41800000	72999999	Y	gene_id "ENSMUSG00000074259.10"; transcript_id "fb846e97-1765-4e8d-ad9e-c3ea5d4f2948_REV_pT_Ad5p_TSO3p";
chr9	59657052	59679375	chr9	41800000	72999999	Y	gene_id "ENSMUSG00000032294.17"; transcript_id "6c3f1f15-8366-46d5-bb68-bdae7d423cc5_REV_pT_Ad5p_TSO3p";
chr9	59657090	59679375	chr9	41800000	72999999	Y	gene_id "ENSMUSG00000032294.17"; transcript_id "5884e37f-ac1c-4352-bc64-5d1c3bed0ee2_REV_pT_Ad5p-1_TSO3p";
chr9	59657240	59679375	chr9	41800000	72999999	Y	gene_id "ENSMUSG00000032294.17"; transcript_id "87fb859e-d5ae-4559-af8b-c040a36168f7_REV_pT_Ad5p_TSO3p";
chr9	59657240	59679375	chr9	41800000	72999999	Y	gene_id "ENSMUSG00000032294.17"; transcript_id "b3deb938-b5d9-4823-9346-34d0980f5c98_FWD_pA_Ad3p_TSO3p";
chr9	59657240	59679375	chr9	41800000	72999999	Y	gene_id "ENSMUSG00000032294.17"; transcript_id "d1b88ba7-ad21-4c5d-8301-5a6e5f34547c_REV_pT_Ad5p_TSO5p3p";
chr9	59657544	59679375	chr9	41800000	72999999	Y	gene_id "ENSMUSG00000032294.17"; transcript_id "571c7c82-b0ab-4018-9957-61e56807e945_FWD_pA_Ad3p";
chr9	59845649	59950034	chr9	41800000	72999999	Y	gene_id "ENSMUSG00000032292.8"; transcript_id "421c7f0e-ec56-40ad-ab48-b0e9ff9c2c60_FWD_pA_Ad3p";
chr9	60393741	60522046	chr9	41800000	72999999	Y	gene_id "ENSMUSG00000032289.15"; transcript_id "0be6f456-1f53-4ad6-995d-4f81186b1505_REV_pT_Ad5p_TSO3p";
chr9	72925645	72973064	chr9	41800000	72999999	Y	gene_id "ENSMUSG00000092192.7"; transcript_id "126e25a6-3632-431c-b6a7-9fa207735a22_REV_pT_Ad5p_TSO3p";
chr9	72925645	72973064	chr9	41800000	72999999	Y	gene_id "ENSMUSG00000092192.7"; transcript_id "17d74b1a-3c13-4c7f-b6bc-0600c592d3ab_REV_pT_Ad5p";
chr9	72925645	72973064	chr9	41800000	72999999	Y	gene_id "ENSMUSG00000092192.7"; transcript_id "f4ee252e-e09d-4a32-bb9a-cb3fa53d4b79_FWD_pA_Ad3p";
chr9	83548327	83693223	chr9	83200000	83799999	Y	gene_id "ENSMUSG00000032261.16"; transcript_id "64b81e9e-a9e9-4bd5-bce0-cd74b92490e4_REV_pT_Ad5p-1_TSO3p";
chr9	87015537	87077381				N	gene_id "ENSMUSG00000032872.16"; transcript_id "5d3ac6e7-2a6d-4edc-9f58-782474c8321c_FWD_pA_Ad3p_TSO5p";
chr9	87015537	87030812				N	gene_id "ENSMUSG00000047897.10"; transcript_id "7dd466e5-1b62-40a7-a39a-fbbf4b9d3f54_FWD_pA_Ad3p";
chr9	87015636	87077381				N	gene_id "ENSMUSG00000032872.16"; transcript_id "47570612-b74a-4f1e-a180-cb5195860fbf_REV_pT_Ad5p_TSO3p";
chr9	87015636	87077381				N	gene_id "ENSMUSG00000032872.16"; transcript_id "4a05742b-3676-416f-ba90-65cb781649f4_FWD_pA_Ad3p";
chr9	87015636	87077381				N	gene_id "ENSMUSG00000032872.16"; transcript_id "dc08c942-d5f4-46fe-bb23-65adf7a33b8d_FWD_pA_Ad3p";
chr9	87015636	87032674				N	gene_id "ENSMUSG00000032872.16"; transcript_id "ecdfe3df-3ead-4b46-8d03-c2f03c752958_FWD_pA_Ad3p";
chr9	103209025	103282672	chr9	102500000	104099999	Y	gene_id "ENSMUSG00000032554.15"; transcript_id "3d959206-ebf0-47ef-80a6-641a87cc3630_REV_pT_Ad5p_TSO3p";
chr9	103209025	103282672	chr9	102500000	104099999	Y	gene_id "ENSMUSG00000032554.15"; transcript_id "4202fd05-d7cd-4499-ab9f-999cbcf4107b_REV_pT_Ad5p_TSO3p";
chr9	103210568	103263187	chr9	102500000	104099999	Y	gene_id "ENSMUSG00000033688.10"; transcript_id "450c4055-cad9-45b3-86a0-945c3256e0dd_FWD_pA_Ad3p";
chr9	106695213	106891979	chr9	106000000	109099999	Y	gene_id "ENSMUSG00000032575.16"; transcript_id "71c34291-39dc-4dc2-afc4-4b0661c55b4c_REV_pT_Ad5p_TSO3p";
chr9	106888753	106900748	chr9	106000000	109099999	Y	gene_id "ENSMUSG00000032575.16"; transcript_id "85787425-8163-44e0-964a-468ba96c542f_REV_pT_Ad5p_TSO3p";
chr9	108517599	108560163	chr9	106000000	109099999	Y	gene_id "ENSMUSG00000006673.14"; transcript_id "b612cb71-78e6-4649-a3c8-8fe49e8e7831_REV_pT_Ad5p_TSO3p";
chr9	108517599	108560163	chr9	106000000	109099999	Y	gene_id "ENSMUSG00000006673.14"; transcript_id "d1b63b4c-0ba2-4602-a60d-07b3a49813b1_REV_pT_Ad5p_TSO3p";
chr9	108517623	108560163	chr9	106000000	109099999	Y	gene_id "ENSMUSG00000006673.14"; transcript_id "5e570bdd-9ea2-44c2-8947-77a7bb4925ad_REV_pT_Ad5p_TSO3p";
chr9	108517623	108560163	chr9	106000000	109099999	Y	gene_id "ENSMUSG00000006673.14"; transcript_id "dd4254de-b001-4c1e-931f-3609229a533b_REV_pT_Ad5p_TSO3p";
chr9	109072622	109082378	chr9	106000000	109099999	Y	gene_id "ENSMUSG00000091537.2"; transcript_id "5f190454-04d7-4ec9-86a3-97b756eda0a2_REV_pT_Ad5p_TSO3p";
chr9	114756836	114844152	chr9	114300000	115599999	Y	gene_id "ENSMUSG00000032436.17"; transcript_id "ae7064a1-4ec9-4d60-9ae3-d235323e109c_FWD_pA_Ad3p";
chr9	122351730	122423376	chr9	119800000	123499999	Y	gene_id "ENSMUSG00000032540.16"; transcript_id "64b20263-5d35-4dbd-b451-2958f75b0e4d_FWD_pA_Ad3p";
chr9	122853804	122903146	chr9	119800000	123499999	Y	gene_id "ENSMUSG00000047036.8"; transcript_id "f441b663-8e9f-4aa7-a8f4-c6f7600e70fe_REV_pT_Ad5p_TSO3p";
chr9	122861378	122903146	chr9	119800000	123499999	Y	gene_id "ENSMUSG00000097322.8"; transcript_id "9e8a5610-924b-4343-8e0b-0e49998d131e_FWD_pA_Ad3p_TSO5p";
chr9	123021326	123049542	chr9	119800000	123499999	Y	gene_id "ENSMUSG00000025787.6"; transcript_id "a82a8c01-22a4-4872-9974-3c3570168874_FWD_pA_Ad3p_TSO5p";
chr9	123113242	123157432	chr9	119800000	123499999	Y	gene_id "ENSMUSG00000025785.5"; transcript_id "1236cd35-d74b-46f9-9919-5fbfae38d087_REV_pT_Ad5p_TSO3p";
chr9	123113242	123157432	chr9	119800000	123499999	Y	gene_id "ENSMUSG00000025785.5"; transcript_id "1a1bbf06-8d7f-41c7-a580-f51e6d6e0ba2_REV_pT_Ad5p_TSO3p";
chrX	7867679	7881795	chrX	7700000	7899999	Y	gene_id "ENSMUSG00000031154.15"; transcript_id "dffbf4ae-a6c8-47d0-a3c7-dd2a3e276f6e_FWD_pA_Ad3p";
chrX	7884328	7906865	chrX	7700000	7899999	N	gene_id "ENSMUSG00000031158.11"; transcript_id "5cd231c7-5216-427f-835d-af673f104dcf_FWD_pA_Ad3p";
chrX	20364559	20480327	chrX	20200000	20399999	N	gene_id "ENSMUSG00000037315.15"; transcript_id "c89e68e0-4477-4a31-88f1-8970fa2f39f6_FWD_pA_Ad3p";
chrX	37265338	37395621	chrX	37100000	37299999	N	gene_id "ENSMUSG00000094945.3"; transcript_id "89f8d4a9-3b68-41f2-a1a3-93e02b077abb_REV_pT_Ad5p_TSO3p";
chrX	37432494	37519176	chrX	37300000	37499999	N	gene_id "ENSMUSG00000079633.3"; transcript_id "a3638e53-67d5-4fd5-92c8-153fd3b9682f_REV_pT_Ad5p_TSO3p";
chrX	52912266	53021659	chrX	52700000	52999999	N	gene_id "ENSMUSG00000025630.8"; transcript_id "b7b3b9ea-790d-400c-b6e4-058680db05f6_FWD_pA_Ad3p";
chrX	52912295	53021659	chrX	52700000	52999999	N	gene_id "ENSMUSG00000025630.8"; transcript_id "c1bb4b26-c8d8-4a1a-a7c5-6bd1a85fcf5f_FWD_pA_Ad3p";
chrX	73093729	73265390	chrX	73000000	73199999	N	gene_id "ENSMUSG00000058147.1"; transcript_id "648bd47f-972a-4f05-9cca-524ba122100b_FWD_pA_Ad3p";
chrX	135839056	135891078				N	gene_id "ENSMUSG00000072964.14"; transcript_id "d7657e3e-d62c-4298-b568-ae80808c5cf2_REV_pT_Ad5p_TSO3p";
chrX	135839056	135890864				N	gene_id "ENSMUSG00000072964.14"; transcript_id "e9a9947b-5313-4ecd-9866-c0a7f697db00_FWD_pA_Ad3p_TSO5p";
chrX	135839056	135891078				N	gene_id "ENSMUSG00000072964.14"; transcript_id "f69afc0a-10f7-4b99-aeca-1af955f306e5_REV_pT_Ad5p_TSO3p";
chrX	136732942	136774381	chrX	136300000	137499999	Y	gene_id "ENSMUSG00000031422.16"; transcript_id "d8daa8c0-7b6f-4a29-b78c-13b3c7f702a7_REV_pT_Ad5p";
chrX	136955265	136993032	chrX	136300000	137499999	Y	gene_id "ENSMUSG00000089996.6"; transcript_id "96689819-5f8e-4a40-8cee-aef75060a4cf_FWD_pA_Ad3p";
chrX	166413313	166479646	chrX	166200000	166499999	Y	gene_id "ENSMUSG00000040586.8"; transcript_id "17ef2b45-2a9f-4ade-a46a-78f3683a8ac7_REV_pT_Ad5p_TSO3p";
chrX	166457253	166510478	chrX	166200000	166499999	N	gene_id "ENSMUSG00000051224.13"; transcript_id "7fdd2a74-96d7-4e05-b1d3-492db440b376_FWD_pA_Ad3p_TSO5p";
