# Supplementary material for: Integrating short-read and long-read single-cell RNA sequencing for comprehensive transcriptome profiling in mouse retina
Source: HighWire-hosted journal article supplement (doi:10.1101/gr.279167.124), 2025-03-06
Supplement: Supplemental_Table_S7.xlsx [file Supplemental_Table_S7.xlsx]

## Sheet: gffcompare_ray2020
Supplemental Table S7 Comparison of Isoforms with Ray et al. (2020)
Gene ID Ray_2020	Transcript ID Ray_2020	Gene ID before abundance filtering	Transcript ID before abundance filtering	Gene ID after abundance filtering	Transcript ID after abundance filtering
PB.442	PB.442.10	ENSMUSG00000037995.15	ENSMUST00000052629.12	ENSMUSG00000037995.15	ENSMUST00000052629.12
PB.442	PB.442.23	ENSMUSG00000037995.15	4bae4275-7219-4658-80be-dcb560088e85_REV_pT_Ad5p_TSO3p	-
PB.442	PB.442.30	ENSMUSG00000037995.15	68acaed4-5d0a-43f9-b07d-944369fa383e_FWD_pA_Ad3p	ENSMUSG00000037995.15	68acaed4-5d0a-43f9-b07d-944369fa383e_FWD_pA_Ad3p
PB.442	PB.442.195	ENSMUSG00000037995.15	dede7f49-f9c5-4103-8c41-58a4672c6cda_FWD_pA_Ad3p	-
PB.442	PB.442.323	ENSMUSG00000037995.15	379ae14e-4337-4366-b747-466212863f91_REV_pT_Ad5p_TSO3p	-
PB.442	PB.442.616	ENSMUSG00000037995.15	ecaacd05-8271-43cb-99fa-2c363d228f87_FWD_pA_Ad3p	-
PB.442	PB.442.621	ENSMUSG00000037995.15	a76c8566-a048-4ab2-b309-9c83e491b5b9_REV_pT_Ad5p_TSO3p	-
PB.442	PB.442.633	ENSMUSG00000026547.15	ENSMUST00000111230.7	ENSMUSG00000026547.15	ENSMUST00000111230.7
PB.338	PB.338.150	ENSMUSG00000063681.14	82b05463-edc9-4886-aa36-be83b12242fb_REV_pT_Ad5p	-
PB.338	PB.338.339	ENSMUSG00000063681.14	ENSMUST00000196402.4	ENSMUSG00000063681.14	ENSMUST00000196402.4
PB.564	PB.564.1	ENSMUSG00000019889.10	5ca7e689-3016-45f1-9953-7e478b82dbb5_FWD_pA_Ad3p	ENSMUSG00000019889.10	5ca7e689-3016-45f1-9953-7e478b82dbb5_FWD_pA_Ad3p
PB.564	PB.564.12	ENSMUSG00000019889.10	0efa00b9-e936-4e61-8bba-3bc33b3df951_FWD_pA_Ad3p	ENSMUSG00000019889.10	0efa00b9-e936-4e61-8bba-3bc33b3df951_FWD_pA_Ad3p
PB.1599	PB.1599.72	ENSMUSG00000020598.16	da963292-7771-4481-9b99-6371d1f142a5_FWD_pA_Ad3p	-
PB.1599	PB.1599.116	ENSMUSG00000020598.16	15f000bc-12a1-415a-af43-6e9f65d10a9a_FWD_pA_Ad3p	ENSMUSG00000020598.16	15f000bc-12a1-415a-af43-6e9f65d10a9a_FWD_pA_Ad3p
PB.1599	PB.1599.135	ENSMUSG00000020598.16	ENSMUST00000110748.3	-
PB.1599	PB.1599.186	ENSMUSG00000020598.16	8603d507-c74c-4c78-a509-4766e853c10a_FWD_pA_Ad3p	-
PB.1599	PB.1599.1172	ENSMUSG00000020598.16	fe09ef74-8228-4c12-88e3-643c5e357097_FWD_pA_Ad3p_TSO5p	-
PB.1599	PB.1599.1182	ENSMUSG00000020598.16	dd0aa82f-722a-4525-8c01-70247d610f02_REV_pT_Ad5p_TSO3p	-
PB.1599	PB.1599.1193	ENSMUSG00000020598.16	c3a3dd20-1dd4-463b-814c-89d2abe1da1a_FWD_pA_Ad3p	-
PB.1599	PB.1599.1208	ENSMUSG00000020598.16	a820d8e6-123d-49ad-b494-283a99ae6b53_REV_pT_Ad5p_TSO3p	-
PB.1841	PB.1841.11	ENSMUSG00000002799.6	376a89bb-53ce-4e8d-ba2d-42cd971d3b88_REV_pT_Ad5p_TSO3p	ENSMUSG00000002799.6	376a89bb-53ce-4e8d-ba2d-42cd971d3b88_REV_pT_Ad5p_TSO3p
PB.1841	PB.1841.37	ENSMUSG00000002804.4	ENSMUST00000221397.1	ENSMUSG00000002804.4	ENSMUST00000221397.1
PB.1976	PB.1976.40	ENSMUSG00000021451.16	ENSMUST00000110039.1	-
PB.1976	PB.1976.41	ENSMUSG00000021451.16	ENSMUST00000021900.13	ENSMUSG00000021451.16	ENSMUST00000021900.13
PB.1976	PB.1976.58	ENSMUSG00000021451.16	e1fe7436-62f0-4cdd-82d8-23172f0d85d6_REV_pT_Ad5p_TSO3p	-
PB.1976	PB.1976.55	ENSMUSG00000021451.16	ENSMUST00000110040.8	-
PB.2509	PB.2509.10	ENSMUSG00000042961.13	ENSMUST00000096494.4-1	ENSMUSG00000042961.13	ENSMUST00000096494.4-1
PB.3104	PB.3104.155	ENSMUSG00000050272.10	a78eb128-bd59-4107-be2d-40cbcf506d84_REV_pT_Ad5p_TSO3p	ENSMUSG00000050272.10	a78eb128-bd59-4107-be2d-40cbcf506d84_REV_pT_Ad5p_TSO3p
PB.3380	PB.3380.11	ENSMUSG00000013236.17	94ec99a7-6ce3-428b-9ed5-2487fa98514f_FWD_pA_Ad3p	-
PB.3489	PB.3489.3	ENSMUSG00000024109.18	ENSMUST00000159778.7-2	ENSMUSG00000024109.18	ENSMUST00000159778.7-2
PB.3489	PB.3489.216	ENSMUSG00000024109.18	63f996b2-d69e-44af-8880-a57155e83c7e_FWD_pA_Ad3p	-
PB.3489	PB.3489.218	ENSMUSG00000024109.18	14042fea-d65f-4323-be37-3840144ff274_FWD_pA_Ad3p_TSO5p	ENSMUSG00000024109.18	14042fea-d65f-4323-be37-3840144ff274_FWD_pA_Ad3p_TSO5p
PB.3631	PB.3631.127	ENSMUSG00000024593.15	646f6a04-5379-417f-b565-4219074e2e7f_REV_pT_Ad5p_TSO3p	-
PB.3631	PB.3631.170	ENSMUSG00000024593.15	b6a5c7e5-967d-4b96-8b46-7269c269c6e1_REV_pT_Ad5p_TSO3p	ENSMUSG00000024593.15	b6a5c7e5-967d-4b96-8b46-7269c269c6e1_REV_pT_Ad5p_TSO3p
PB.3858	PB.3858.13	ENSMUSG00000024924.14	9ee7e5ae-9adf-45a4-af9e-5a5f4c151b0e_FWD_pA_Ad3p	-
PB.3858	PB.3858.23	ENSMUSG00000024924.14	ENSMUST00000172302.7	ENSMUSG00000024924.14	ENSMUST00000172302.7
PB.3858	PB.3858.48	ENSMUSG00000024924.14	ENSMUST00000025866.13	ENSMUSG00000024924.14	ENSMUST00000025866.13
PB.3858	PB.3858.53	ENSMUSG00000024924.14	ENSMUST00000047645.12-1	ENSMUSG00000024924.14	ENSMUST00000047645.12-1
PB.3858	PB.3858.61	ENSMUSG00000024924.14	ENSMUST00000167487.7	ENSMUSG00000024924.14	ENSMUST00000167487.7
PB.3923	PB.3923.2	ENSMUSG00000025207.16	bd964d36-ca96-44ec-ba3b-64d8ce464b2b_FWD_pA_Ad3p	ENSMUSG00000025207.16	bd964d36-ca96-44ec-ba3b-64d8ce464b2b_FWD_pA_Ad3p
PB.5078	PB.5078.7	ENSMUSG00000028184.12	befd5228-982d-4558-a06f-a4c3ebdfaf54_REV_pT_Ad5p_TSO3p	-
PB.5078	PB.5078.836	ENSMUSG00000028184.12	7393aad1-b7b6-4f6a-8975-d9acda1a8cad_FWD_pA_Ad3p	ENSMUSG00000028184.12	7393aad1-b7b6-4f6a-8975-d9acda1a8cad_FWD_pA_Ad3p
PB.5397	PB.5397.317	ENSMUSG00000033295.14	77c34af0-a35e-4bcc-bea0-dbf0b78691d0_FWD_pA_Ad3p	ENSMUSG00000033295.14	77c34af0-a35e-4bcc-bea0-dbf0b78691d0_FWD_pA_Ad3p
PB.5696	PB.5696.35	ENSMUSG00000028883.17	ENSMUST00000030714.7	ENSMUSG00000028883.17	ENSMUST00000030714.7
PB.5890	PB.5890.105	ENSMUSG00000037605.16	aac0311c-4982-4eb2-b69a-ef7f1a49557b_FWD_pA_Ad3p	ENSMUSG00000037605.16	aac0311c-4982-4eb2-b69a-ef7f1a49557b_FWD_pA_Ad3p
PB.5890	PB.5890.101	ENSMUSG00000037605.16	ENSMUST00000140356.7	-
PB.5890	PB.5890.434	ENSMUSG00000037605.16	760f1d7c-e73c-42a7-89c3-bbe161c1ee7a_REV_pT_Ad5p_TSO3p	-
PB.5890	PB.5890.458	ENSMUSG00000037605.16	d182a0ca-aa3c-477e-ae0a-bf10d179b68c_FWD_pA_Ad3p	-
PB.5890	PB.5890.613	ENSMUSG00000037605.16	6ca600fe-08f6-4a4d-ac76-ac5affe2643a_REV_pT_Ad5p_TSO3p	-
PB.5890	PB.5890.698	ENSMUSG00000037605.16	121a5a77-dd9d-4ad7-a5bc-06c7e68e416f_FWD_pA_Ad3p	-
PB.6485	PB.6485.1	ENSMUSG00000030092.14	b97ce8a4-b216-46b9-996c-74eda6ed5462_REV_pT_Ad5p-1_TSO3p	ENSMUSG00000030092.14	b97ce8a4-b216-46b9-996c-74eda6ed5462_REV_pT_Ad5p-1_TSO3p
PB.6485	PB.6485.2	ENSMUSG00000030092.14	b4a54778-6531-4f5c-a969-bceaa7f4343f_REV_pT_Ad5p	ENSMUSG00000030092.14	b4a54778-6531-4f5c-a969-bceaa7f4343f_REV_pT_Ad5p
PB.6485	PB.6485.7	ENSMUSG00000030092.14	e3153e06-5f93-4150-8eae-022111784363_FWD_pA_Ad3p	ENSMUSG00000030092.14	e3153e06-5f93-4150-8eae-022111784363_FWD_pA_Ad3p
PB.6486	PB.6486.8	ENSMUSG00000064293.14	21a65aee-eac0-4977-bdb5-ea10bd4e744d_REV_pT_Ad5p_TSO3p	ENSMUSG00000064293.14	21a65aee-eac0-4977-bdb5-ea10bd4e744d_REV_pT_Ad5p_TSO3p
PB.6486	PB.6486.45	ENSMUSG00000064293.14	7890c888-1438-4922-a2bd-4944ad1eb714_FWD_pA_Ad3p	ENSMUSG00000064293.14	7890c888-1438-4922-a2bd-4944ad1eb714_FWD_pA_Ad3p
PB.6486	PB.6486.126	ENSMUSG00000064293.14	63d87ce1-feb5-4419-856f-b17d4e7610b7_FWD_pA_Ad3p	-
PB.6486	PB.6486.127	ENSMUSG00000064293.14	0ecc9c44-1df0-4e8e-8c6a-b21dd50d9214_REV_pT_Ad5p_TSO3p	-
PB.7444	PB.7444.144	ENSMUSG00000013033.16	b597d9b4-40c6-4149-a00c-f1d79fceef1c_REV_pT_Ad5p	-
PB.7735	PB.7735.98	ENSMUSG00000038119.15	aa4b6a16-69f6-445f-949e-de1b39043c09_REV_pT_Ad5p_TSO3p	-
PB.7790	PB.7790.20	ENSMUSG00000032076.20	ENSMUST00000152459.7	ENSMUSG00000032076.20	ENSMUST00000152459.7
PB.7883	PB.7883.6	ENSMUSG00000036466.17	83f3aef3-c1d5-472d-94f6-0600df67aa81_REV_pT_Ad5p_TSO3p	ENSMUSG00000036466.17	83f3aef3-c1d5-472d-94f6-0600df67aa81_REV_pT_Ad5p_TSO3p
PB.7883	PB.7883.9	ENSMUSG00000036466.17	85986d9c-4552-48db-9a87-612738a0fe47_FWD_pA_Ad3p	-
PB.7883	PB.7883.42	ENSMUSG00000036466.17	a4b95237-c3f2-498b-98cd-3f5b9ad1a2e4_REV_pT_Ad5p_TSO3p	-
PB.7883	PB.7883.132	ENSMUSG00000036466.17	68bc9506-406e-4106-b593-31408a43e50d_FWD_pA_Ad3p	-
PB.7883	PB.7883.258	ENSMUSG00000036466.17	8c0ea009-f298-43fa-8d5f-615676d69b12_REV_pT_Ad5p_TSO3p	ENSMUSG00000036466.17	8c0ea009-f298-43fa-8d5f-615676d69b12_REV_pT_Ad5p_TSO3p
PB.7859	PB.7859.229	ENSMUSG00000032340.8	dcde8704-87c4-40ea-9c8d-e1de91171b43_FWD_pA_Ad3p	ENSMUSG00000032340.8	dcde8704-87c4-40ea-9c8d-e1de91171b43_FWD_pA_Ad3p
PB.7859	PB.7859.230	ENSMUSG00000032340.8	cdde6cd9-59ed-4b4a-accc-3e907bf291d6_REV_pT_Ad5p_TSO3p	ENSMUSG00000032340.8	cdde6cd9-59ed-4b4a-accc-3e907bf291d6_REV_pT_Ad5p_TSO3p
