# Supplementary material for: Integrating short-read and long-read single-cell RNA sequencing for comprehensive transcriptome profiling in mouse retina
Source: HighWire-hosted journal article supplement (doi:10.1101/gr.279167.124), 2025-03-06
Supplement: Supplemental_Table_S8.xlsx [file Supplemental_Table_S8.xlsx]

## Sheet: gene_UMI_count
Supplemental Table S8 Comparison of isoform counts for 30 genes in Ray et al. (2020) with supported UMI counts in LR scRNA-seq data
Gene	Isoform Count in Ray 2020	UMI count_beforefiltering	Isoform count_beforefiltering	UMI count_afterfiltering	Isoform Count_afterfiltering
Cadm1	51	1161	8	1148	6
Cdon	125	18	2	18	2
Cntn3	7	35	2	35	2
Cntn4	43	3234	18	2911	5
Cntn5	58	4719	3	4673	1
Cntn6	15	803	8	787	6
Crb1	15	763	13	704	6
Crb2	9	16	2	16	2
Dscam	49	168	11	168	11
Egflam	11	347	7	335	5
Igsf9	418	145	6	145	6
Jag2	25	22	3	22	3
Lphn1/Adgrl1	97	42	3	42	3
Lphn2/Adgrl2	506	451	14	415	9
Lphn3/Adgrl3	422	1260	30	988	11
Lrp8	50	77	5	77	5
Megf10	41	61	2	61	2
Megf11	73	52	3	52	3
Neo1	52	226	12	226	12
Nrcam	408	1866	14	1690	2
Nrxn1	107	335	13	335	13
Nrxn3	892	1625	17	1464	5
Ptprd	235	9871	15	9347	5
Ptprf	120	158	8	158	8
Ptprk	44	1871	17	1672	6
Ptprs	40	157	8	157	8
Sema3a	7	108	7	108	7
Sema4d	37	75	6	75	6
Sema4g	14	54	3	54	3
Vldlr	145	716	11	682	7
