# Supplementary figures and images for: Integrating short-read and long-read single-cell RNA sequencing for comprehensive transcriptome profiling in mouse retina
Source: HighWire-hosted journal article supplement (doi:10.1101/gr.279167.124), 2025-03-06

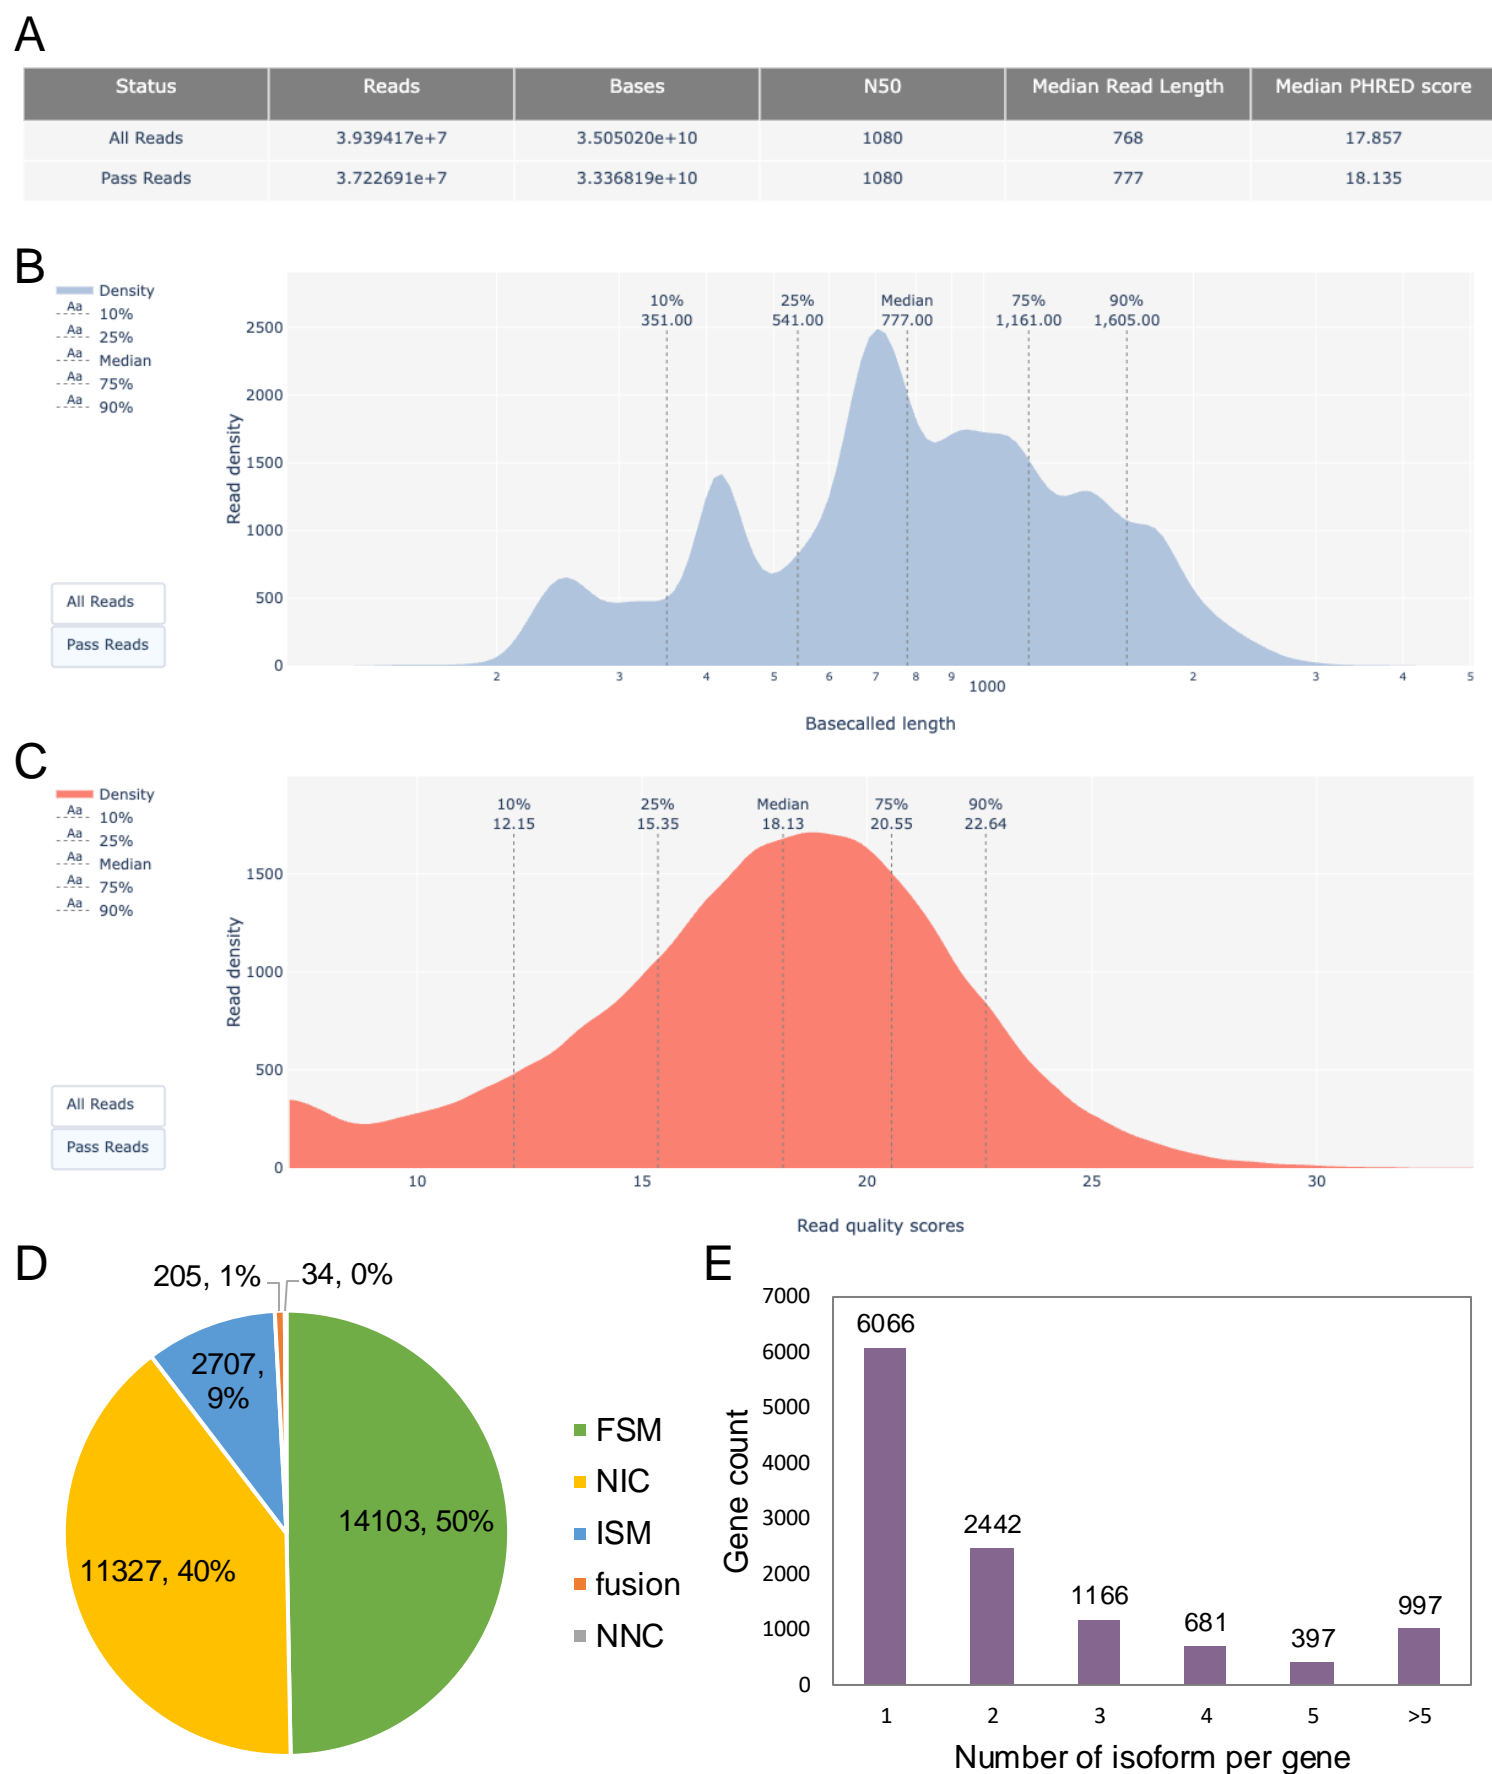

Supplement: Supplemental_Fig_S4.pdf [file Supplemental_Fig_S4.pdf]
